# Supplementary material for: (+)- and (−)-ganodilactone, a pair of meroterpenoid dimers with pancreatic lipase inhibitory activities from the macromycete Ganoderma leucocontextum
Source: Royal Society of Chemistry journal article supplement (doi:10.1039/c6ra10638b), 2016-01-01
Supplement: c6ra10638b1.pdf [file c6ra10638b1.pdf]

**Electronic Supplementary Information for**  
**(+)- and (-)-Ganodilactone, a Pair of Meroterpenoid Dimers with**  
**Pancreatic Lipase Inhibitory Activities from the Macromycete**  
***Ganoderma leucocontextum***

He-Ping Chen,<sup>ac</sup> Zhen-Zhu Zhao,<sup>ac</sup> Yu Zhang,<sup>a</sup> Xue Bai,<sup>a</sup> Ling Zhang<sup>\*a</sup> and Ji-Kai Liu<sup>\*ab</sup>

<sup>a</sup> State Key Laboratory of Phytochemistry and Plant Resources in West China, Kunming Institute of Botany, Chinese Academy of Sciences, Kunming 650201, P. R. China

<sup>b</sup> School of Pharmaceutical Sciences, South-Central University for Nationalities, Wuhan 430074, P. R. China

<sup>c</sup> University of Chinese Academy of Sciences, Beijing 100049, P. R. China

Corresponding authors:

zhangling@mail.kib.ac.cn (L. Zhang);

jkliu@mail.kib.ac.cn (J. K. Liu)

# Contents

|                                                                                                                               |    |
|-------------------------------------------------------------------------------------------------------------------------------|----|
| <b>Table 1S</b> Results of inhibitory activities of compounds ( $\pm$ )- <b>1</b> and <b>2</b> against pancreatic lipase..... | 3  |
| <b>Table 2S</b> Results of inhibitory activities of compounds (+)- <b>1</b> , (-)- <b>1</b> against pancreatic lipase.....    | 4  |
| <b>Fig. 1S</b> $^1\text{H}$ NMR spectrum of <b>1</b> (800 MHz, $\text{DMSO-}d_6$ ).....                                       | 5  |
| <b>Fig. 2S</b> Enlarged $^1\text{H}$ NMR spectra of <b>1</b> (800 MHz, $\text{DMSO-}d_6$ ).....                               | 6  |
| <b>Fig. 3S</b> $^{13}\text{C}$ NMR and DEPT spectra of <b>1</b> (200 MHz, $\text{DMSO-}d_6$ ).....                            | 7  |
| <b>Fig. 4S</b> Enlarged $^{13}\text{C}$ NMR spectra of <b>1</b> (200 MHz, $\text{DMSO-}d_6$ ).....                            | 8  |
| <b>Fig. 5S</b> HSQC spectrum of <b>1</b> ( $\text{DMSO-}d_6$ ).....                                                           | 9  |
| <b>Fig. 6S</b> Enlarged HSQC spectra of <b>1</b> ( $\text{DMSO-}d_6$ ).....                                                   | 10 |
| <b>Fig. 7S</b> $^1\text{H-}^1\text{H}$ COSY spectrum of <b>1</b> ( $\text{DMSO-}d_6$ ).....                                   | 11 |
| <b>Fig. 8S</b> Enlarged $^1\text{H-}^1\text{H}$ COSY spectra of <b>1</b> ( $\text{DMSO-}d_6$ ).....                           | 12 |
| <b>Fig. 9S</b> HMBC spectrum of <b>1</b> ( $\text{DMSO-}d_6$ ).....                                                           | 13 |
| <b>Fig. 10S</b> Enlarged HMBC spectra of <b>1</b> ( $\text{DMSO-}d_6$ ) (a).....                                              | 14 |
| <b>Fig. 11S</b> Enlarged HMBC spectrum of <b>1</b> ( $\text{DMSO-}d_6$ ) (b).....                                             | 15 |
| <b>Fig. 12S</b> Enlarged HMBC spectrum of <b>1</b> ( $\text{DMSO-}d_6$ ) (c).....                                             | 16 |
| <b>Fig. 13S</b> ROESY spectrum of <b>1</b> ( $\text{DMSO-}d_6$ ).....                                                         | 17 |
| <b>Fig. 14S</b> Enlarged ROESY spectra of <b>1</b> ( $\text{DMSO-}d_6$ ).....                                                 | 18 |
| <b>Fig. 15S</b> $^1\text{H}$ NMR spectrum of <b>1</b> ( $\text{CDCl}_3$ ).....                                                | 19 |
| <b>Fig. 16S</b> $^{13}\text{C}$ NMR and DEPT spectra of <b>1</b> ( $\text{CDCl}_3$ ).....                                     | 20 |
| <b>Fig. 17S</b> HSQC spectrum of <b>1</b> ( $\text{CDCl}_3$ ).....                                                            | 21 |
| <b>Fig. 18S</b> $^1\text{H-}^1\text{H}$ COSY spectrum of <b>1</b> ( $\text{CDCl}_3$ ).....                                    | 22 |
| <b>Fig. 19S</b> HMBC spectrum of <b>1</b> ( $\text{CDCl}_3$ ).....                                                            | 23 |
| <b>Fig. 20S</b> ROESY spectrum of <b>1</b> ( $\text{CDCl}_3$ ).....                                                           | 24 |
| <b>Fig. 21S</b> Chiral phase HPLC chromatograph of <b>1</b> .....                                                             | 25 |
| <b>Fig. 22S</b> The CD spectrum of ( $\pm$ )- <b>1</b> .....                                                                  | 26 |
| <b>Fig. 23S</b> The CD spectrum of (+)- <b>1</b> .....                                                                        | 27 |
| <b>Fig. 24S</b> The CD spectrum of (-)- <b>1</b> .....                                                                        | 28 |
| Computational details of the simplified model compound <b>1a</b> .....                                                        | 29 |
| <b>Table 3S</b> Standard orientation of ( <i>7R,9R</i> )- <b>1a</b> at B3LYP/6-31G(d,p) level.....                            | 30 |
| <b>Table 4S</b> Standard orientation of ( <i>7S,9S</i> )- <b>1a</b> at B3LYP/6-31G(d,p) level.....                            | 33 |
| <b>Fig. 25S</b> ESIMS (–) report of <b>1</b> .....                                                                            | 37 |
| <b>Fig. 26S</b> HRESIMS (–) report of <b>1</b> .....                                                                          | 38 |
| <b>Fig. 27S</b> IR spectrum of <b>1</b> .....                                                                                 | 39 |
| <b>Fig. 28S</b> Optical rotatory data of ( $\pm$ )- <b>1</b> .....                                                            | 40 |
| <b>Fig. 29S</b> Optical rotatory data of (+)- <b>1</b> .....                                                                  | 41 |
| <b>Fig. 30S</b> Optical rotatory data of (-)- <b>1</b> .....                                                                  | 42 |
| <b>Fig. 31S</b> UV spectrum of <b>1</b> .....                                                                                 | 43 |

**Table 1S** Results of inhibitory activities of compounds ( $\pm$ )-**1** and **2** against pancreatic lipase.<sup>a</sup>

| Compound            | Concentration ( $\mu$ M) | PPL inhibitory rate (%) | IC <sub>50</sub> ( $\mu$ M) | Concentration ( $\mu$ M) <sup>b</sup> | PPL inhibitory rate (%) <sup>b</sup> | IC <sub>50</sub> ( $\mu$ M) <sup>b</sup> |
|---------------------|--------------------------|-------------------------|-----------------------------|---------------------------------------|--------------------------------------|------------------------------------------|
| Orlistat            | 0.010                    | 80.570                  | 0.003604                    | 0.005                                 | 86.024                               | 0.0018                                   |
|                     | 0.005                    | 63.444                  |                             | 0.002                                 | 51.526                               |                                          |
|                     | 0.0025                   | 34.988                  |                             | 0.001                                 | 28.284                               |                                          |
|                     | 0.00125                  | 2.637                   |                             |                                       |                                      |                                          |
|                     | 0.000625                 | -10.594                 |                             |                                       |                                      |                                          |
|                     | 0.0003125                | -16.698                 |                             |                                       |                                      |                                          |
| Vibralactone        |                          |                         |                             | 10000                                 | 91.800                               | 48.668                                   |
|                     |                          |                         |                             | 1000                                  | 87.038                               |                                          |
|                     |                          |                         |                             | 100                                   | 57.678                               |                                          |
|                     |                          |                         |                             | 10                                    | 33.130                               |                                          |
| ( $\pm$ )- <b>1</b> | 50                       | 64.917                  | 27.269                      |                                       |                                      |                                          |
|                     | 25                       | 47.862                  |                             |                                       |                                      |                                          |
|                     | 12.5                     | 37.007                  |                             |                                       |                                      |                                          |
|                     | 6.25                     | 30.879                  |                             |                                       |                                      |                                          |
|                     | 3.125                    | 24.228                  |                             |                                       |                                      |                                          |
| <b>2</b>            | 50                       | 42.090                  | >50                         |                                       |                                      |                                          |
|                     | 25                       | 26.152                  |                             |                                       |                                      |                                          |
|                     | 12.5                     | 7.767                   |                             |                                       |                                      |                                          |
|                     | 6.25                     | -5.321                  |                             |                                       |                                      |                                          |
|                     | 3.125                    | -18.670                 |                             |                                       |                                      |                                          |

<sup>a</sup> Orlistat used as positive control <sup>b</sup> Data reported in the literature: Chen, H. P.; Zhao, Z. Z.; Li, Z. H.; Dong, Z. J.; Wei, K.; Bai, X.; Zhang, L.; Wen, C. N.; Feng, T.; Liu, J. K. *ChemistryOpen* **2016**. DOI: 10.1002/open.201500198.

**Table 2S** Results of inhibitory activities of compounds (+)-**1**, (-)-**1** against pancreatic lipase.<sup>a</sup>

| Compound     | Concentration (μM) | PPL inhibitory rate (%) | IC <sub>50</sub> (μM) | Compound     | Concentration (μM) | PPL inhibitory rate (%) | IC <sub>50</sub> (μM) |
|--------------|--------------------|-------------------------|-----------------------|--------------|--------------------|-------------------------|-----------------------|
| Orlistat     | 0.005              | 78.985                  | 0.002434              | (+) <b>1</b> | 12.5               | 65.715                  | 3.956                 |
|              | 0.0025             | 51.003                  |                       |              | 3.125              | 46.778                  |                       |
|              | 0.00125            | 25.057                  |                       |              | 0.78125            | 4.494                   |                       |
|              | 0.000625           | 11.066                  |                       |              | 0.1953125          | -21.311                 |                       |
|              | 0.0003125          | 1.908                   |                       |              |                    |                         |                       |
| Vibralactone | 50                 | 41.601                  | >50                   | (-) <b>1</b> | 12.5               | 73.036                  | 2.518                 |
|              | 25                 | 21.472                  |                       |              | 3.125              | 56.868                  |                       |
|              | 12.5               | 7.304                   |                       |              | 0.78125            | 12.761                  |                       |
|              | 6.25               | 0.643                   |                       |              | 0.1953125          | -13.228                 |                       |
|              | 3.125              | -1.461                  |                       |              |                    |                         |                       |

<sup>a</sup> Orlistat and vibralactone used as positive control.

**Fig. 1S**  $^1\text{H}$  NMR spectrum of 1 (800 MHz,  $\text{DMSO-}d_6$ )

1z1x11b.1.1.1r — 1z1x11b

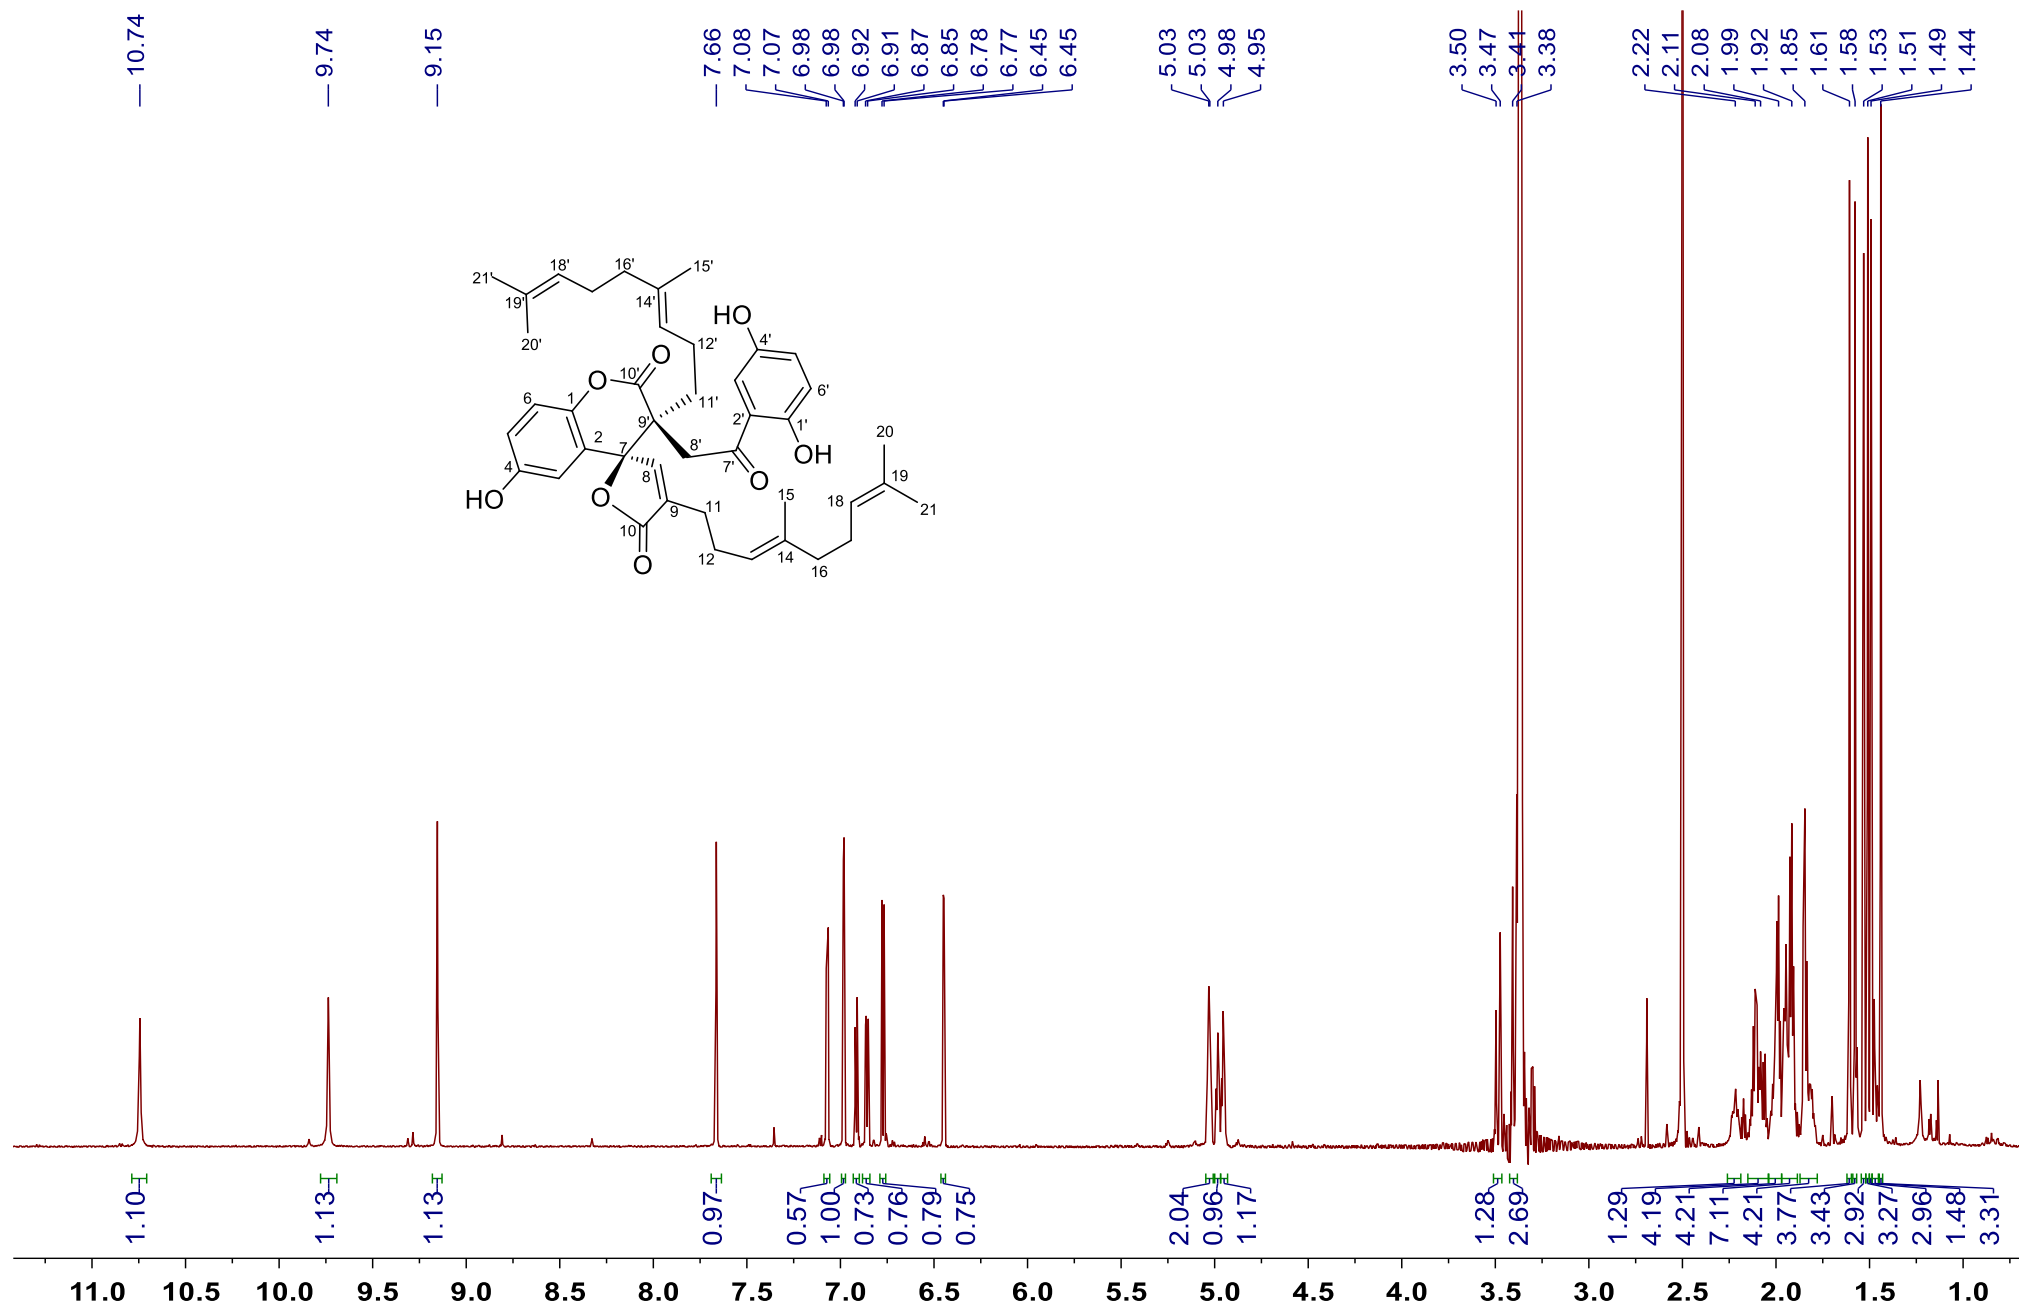

**Fig. 2S** Enlarged  $^1\text{H}$  NMR spectra of **1** (800 MHz,  $\text{DMSO-}d_6$ )

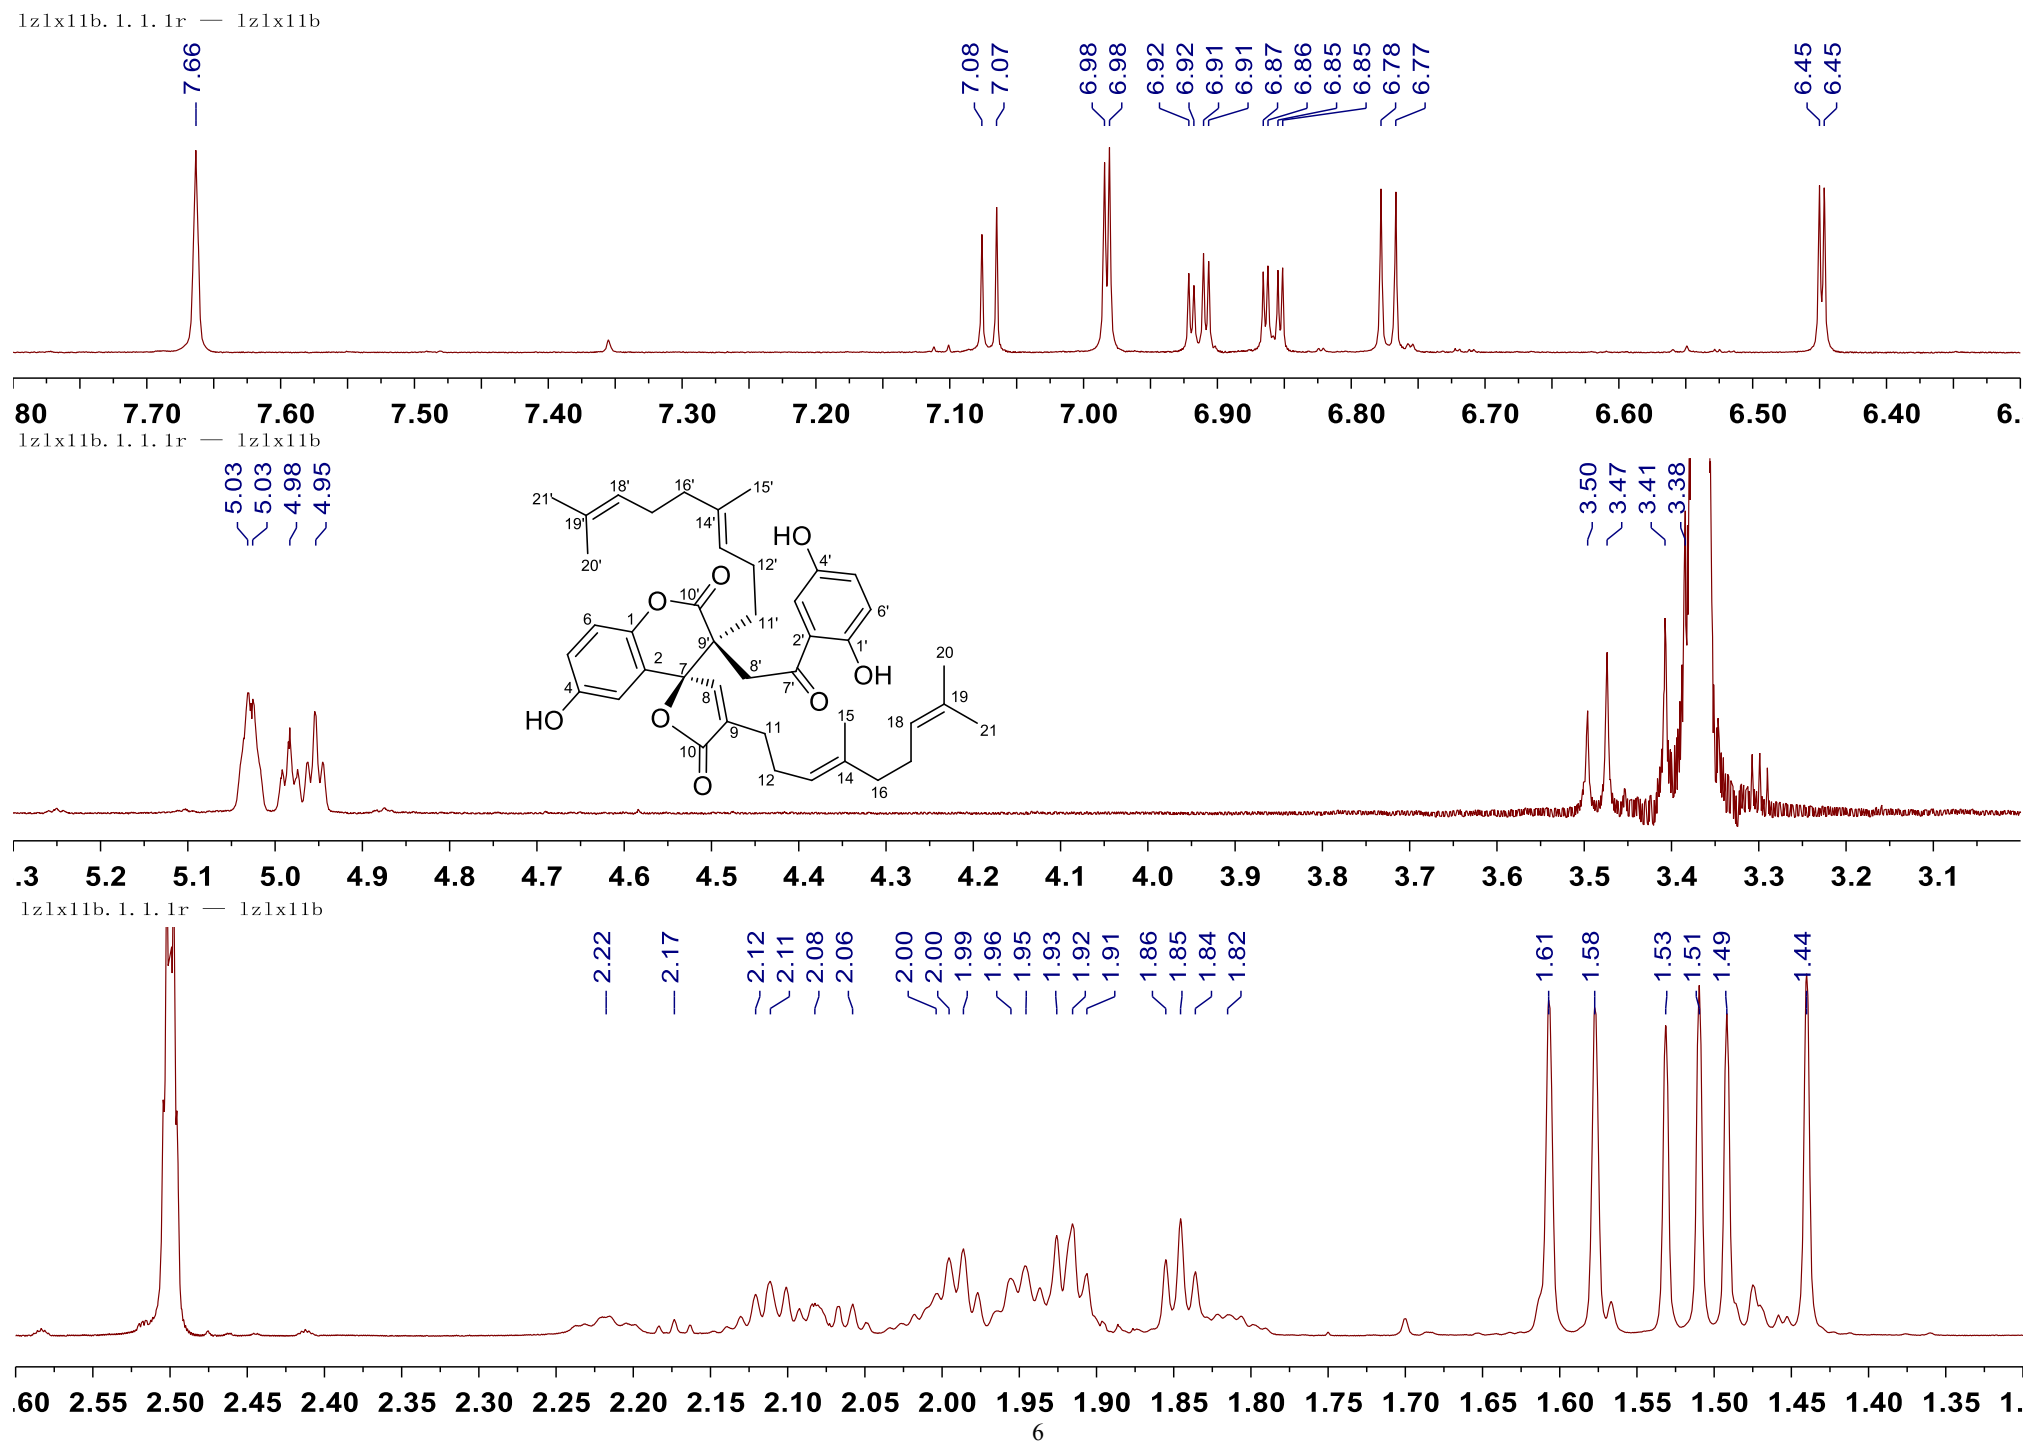

**Fig. 3S**  $^{13}\text{C}$  NMR and DEPT spectra of **1** (200 MHz,  $\text{DMSO-}d_6$ )

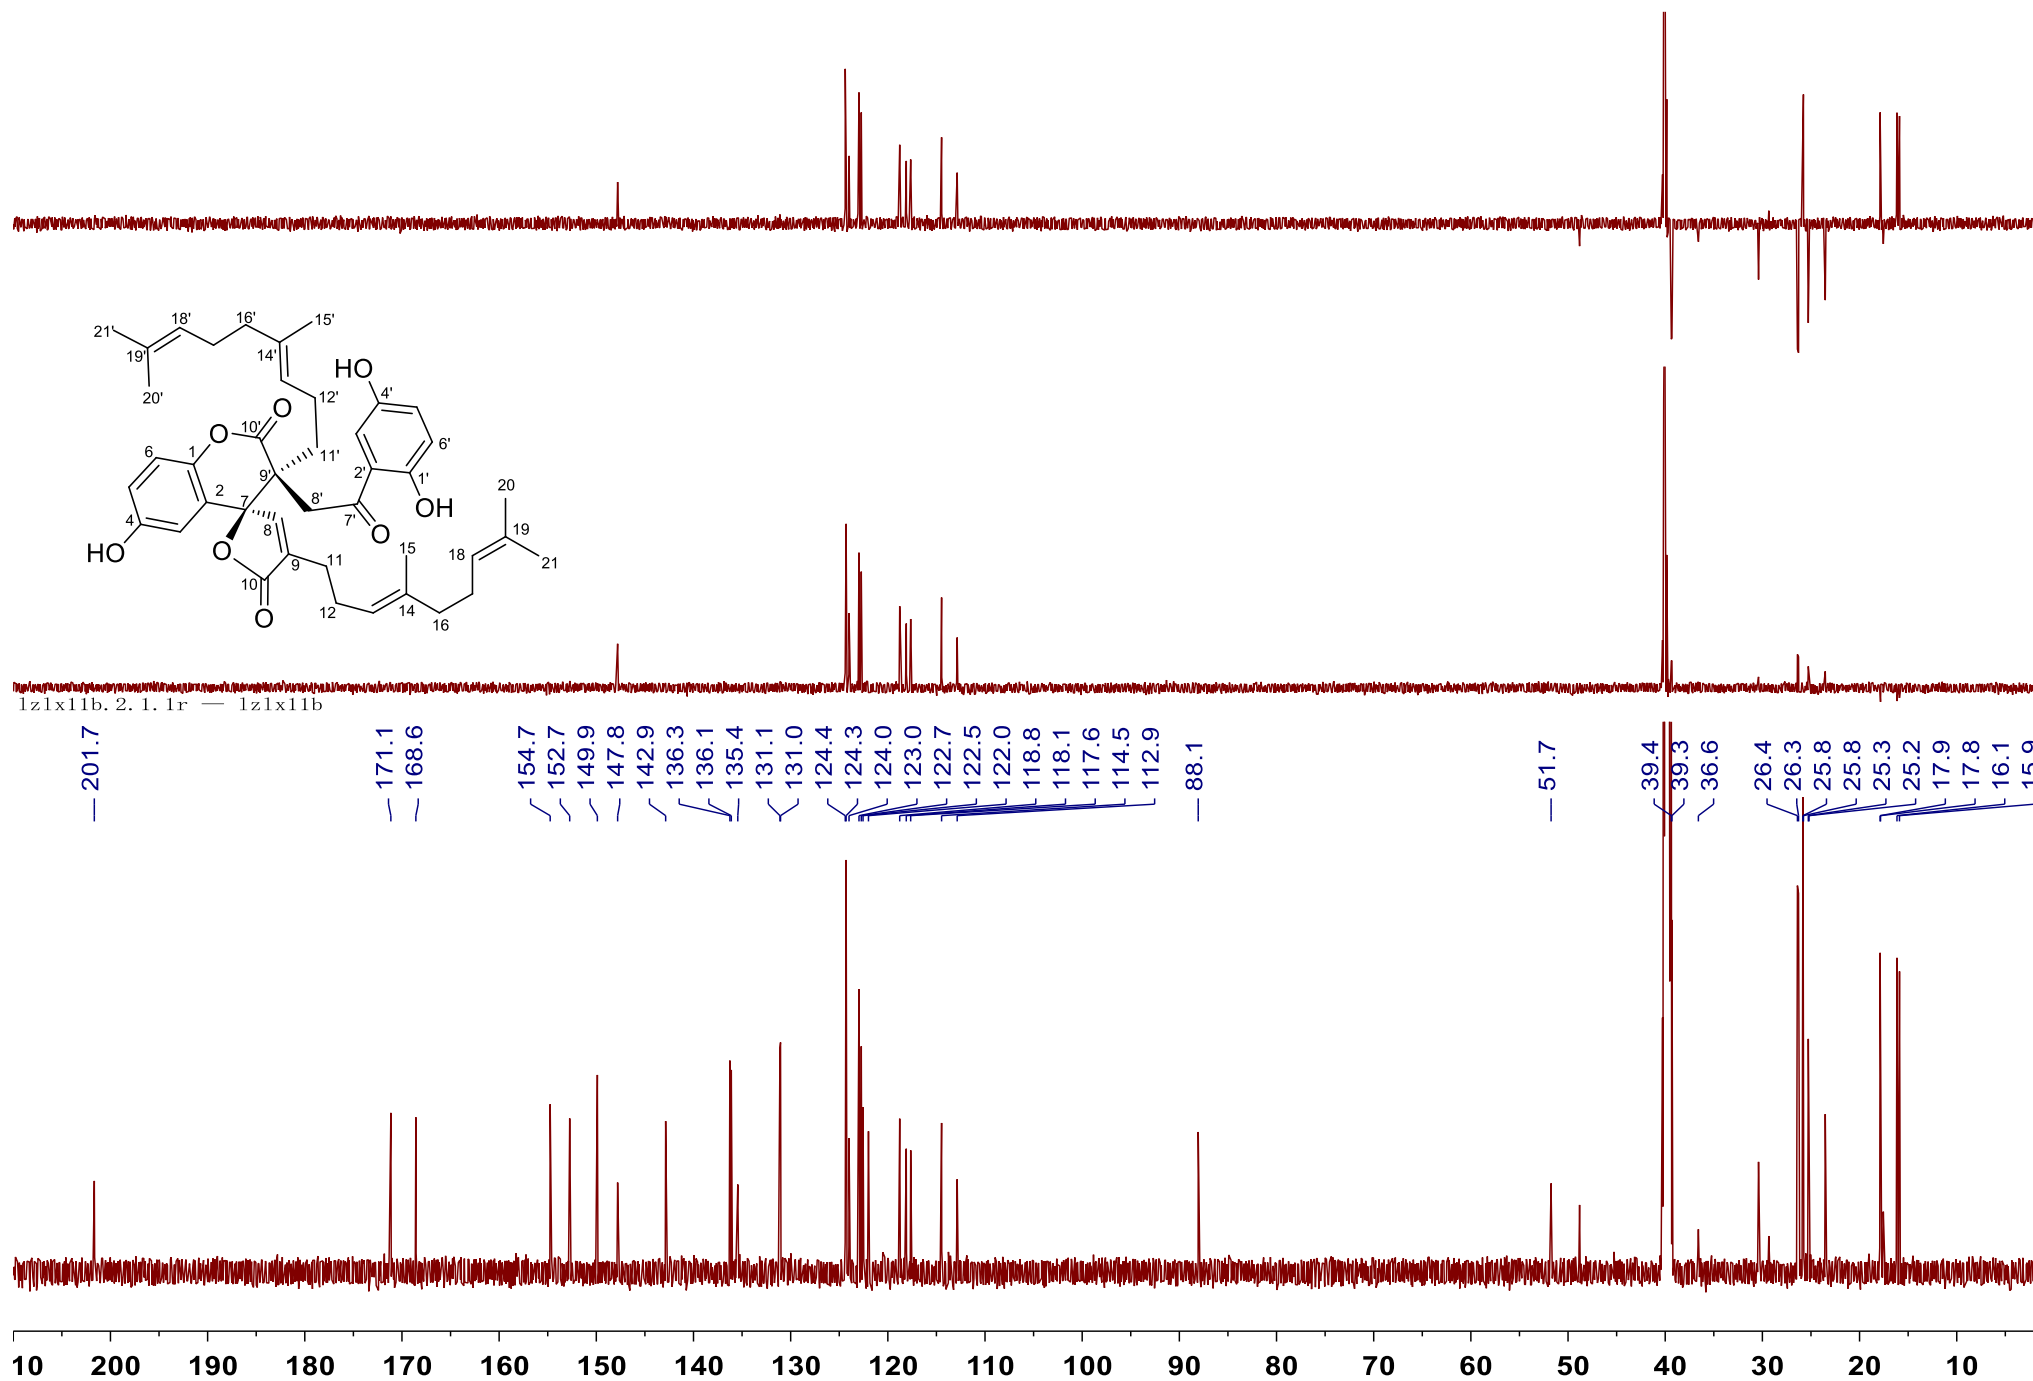

**Fig. 4S** Enlarged  $^{13}\text{C}$  NMR spectra of **1** (200 MHz,  $\text{DMSO-}d_6$ )

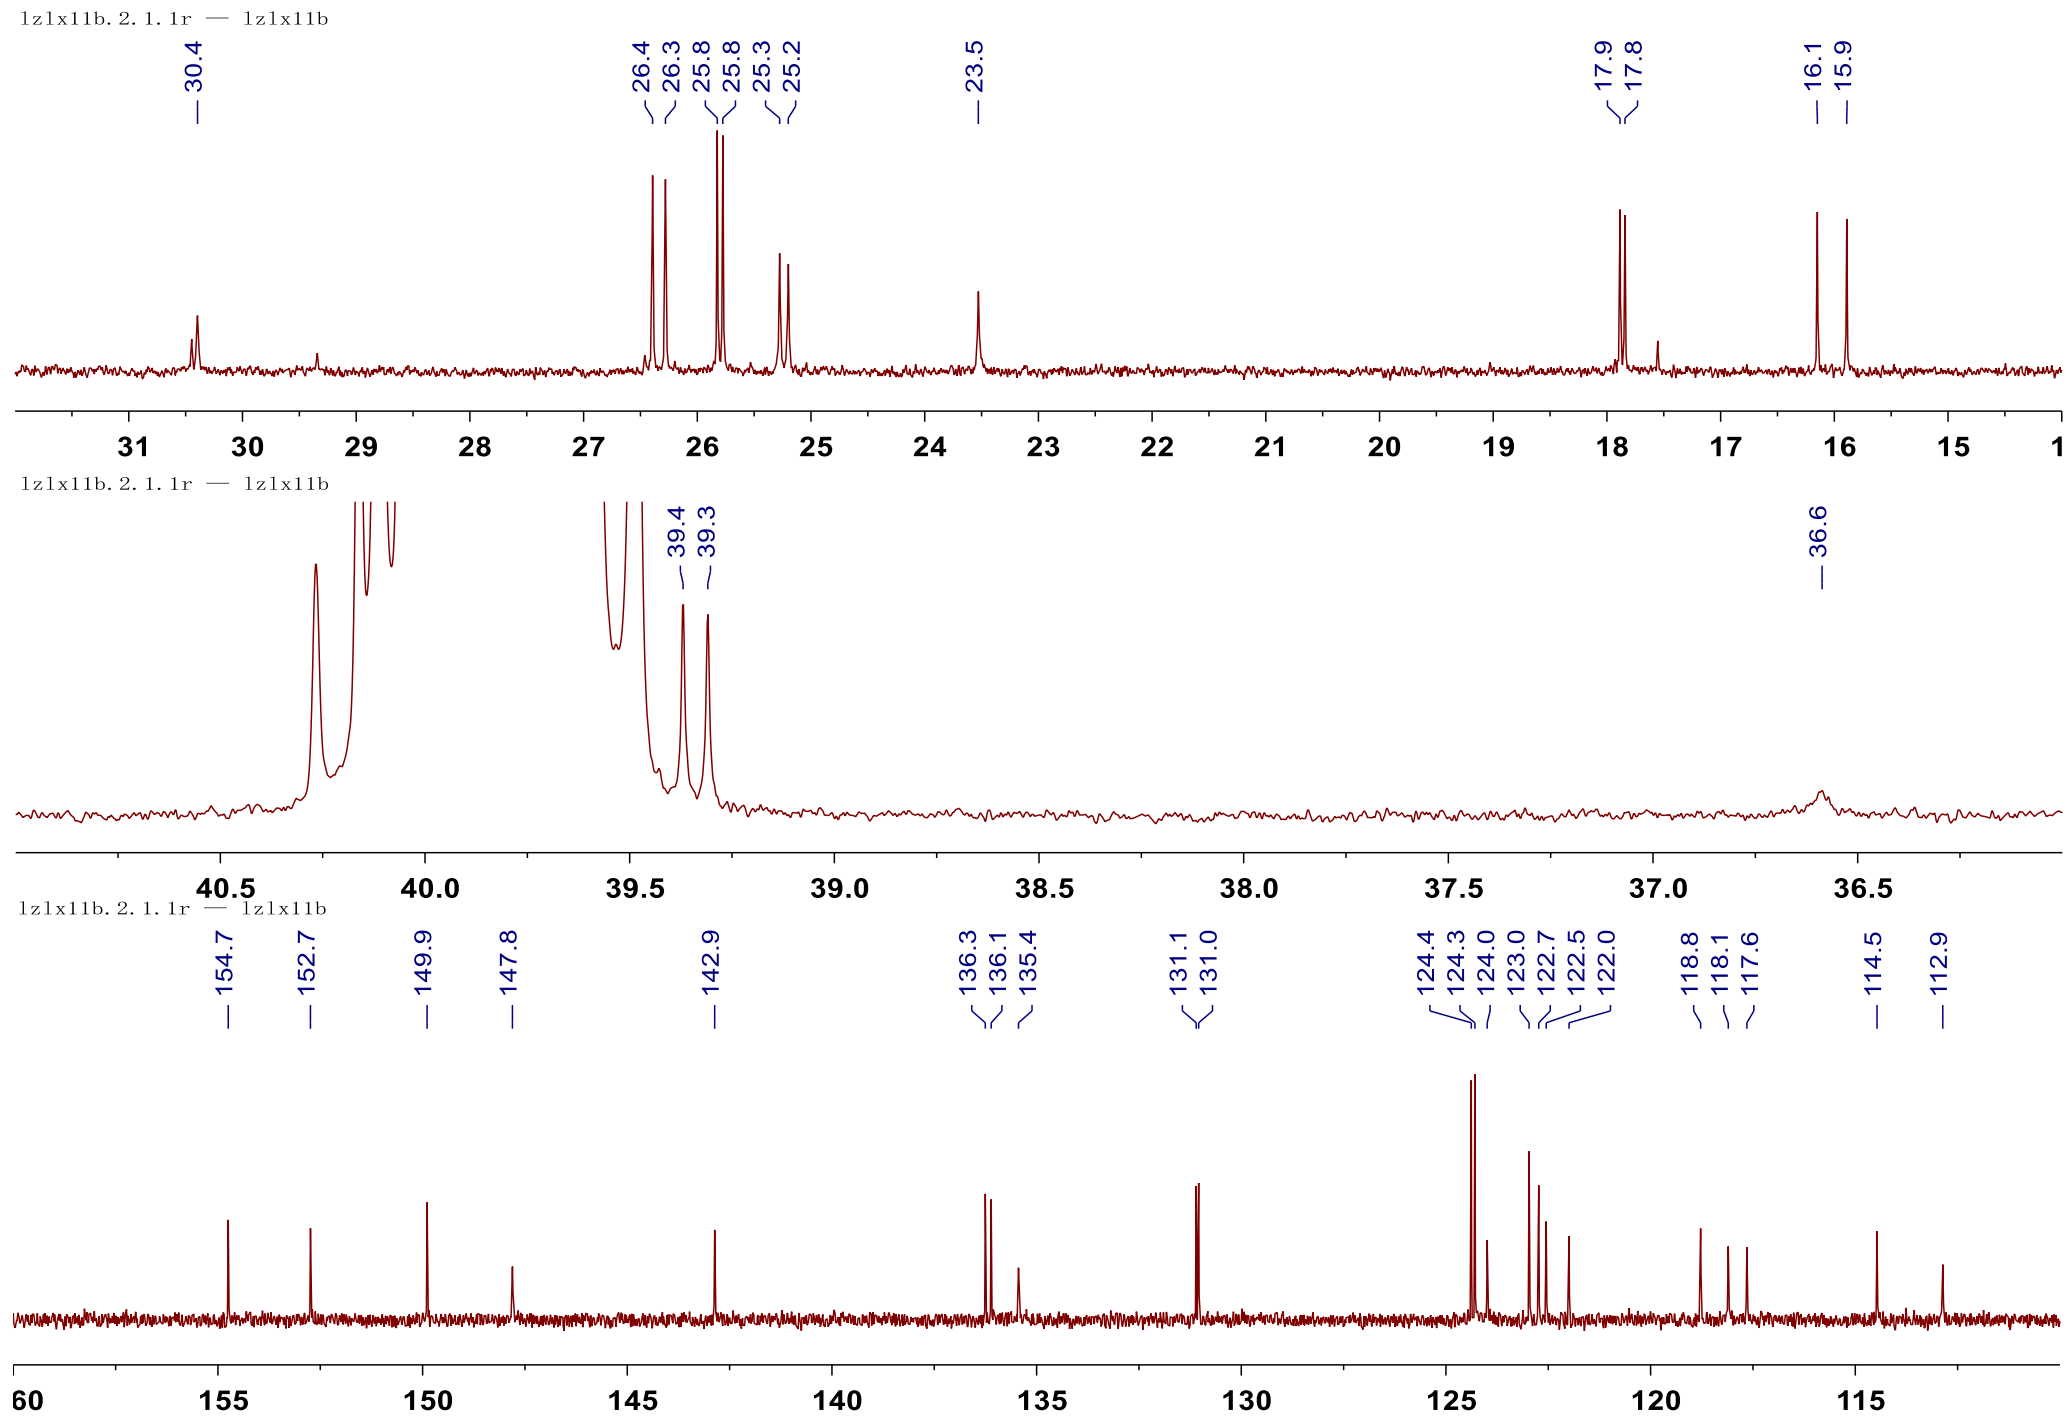



Fig. 5S HSQC spectrum of **1** (DMSO-*d*<sub>6</sub>)

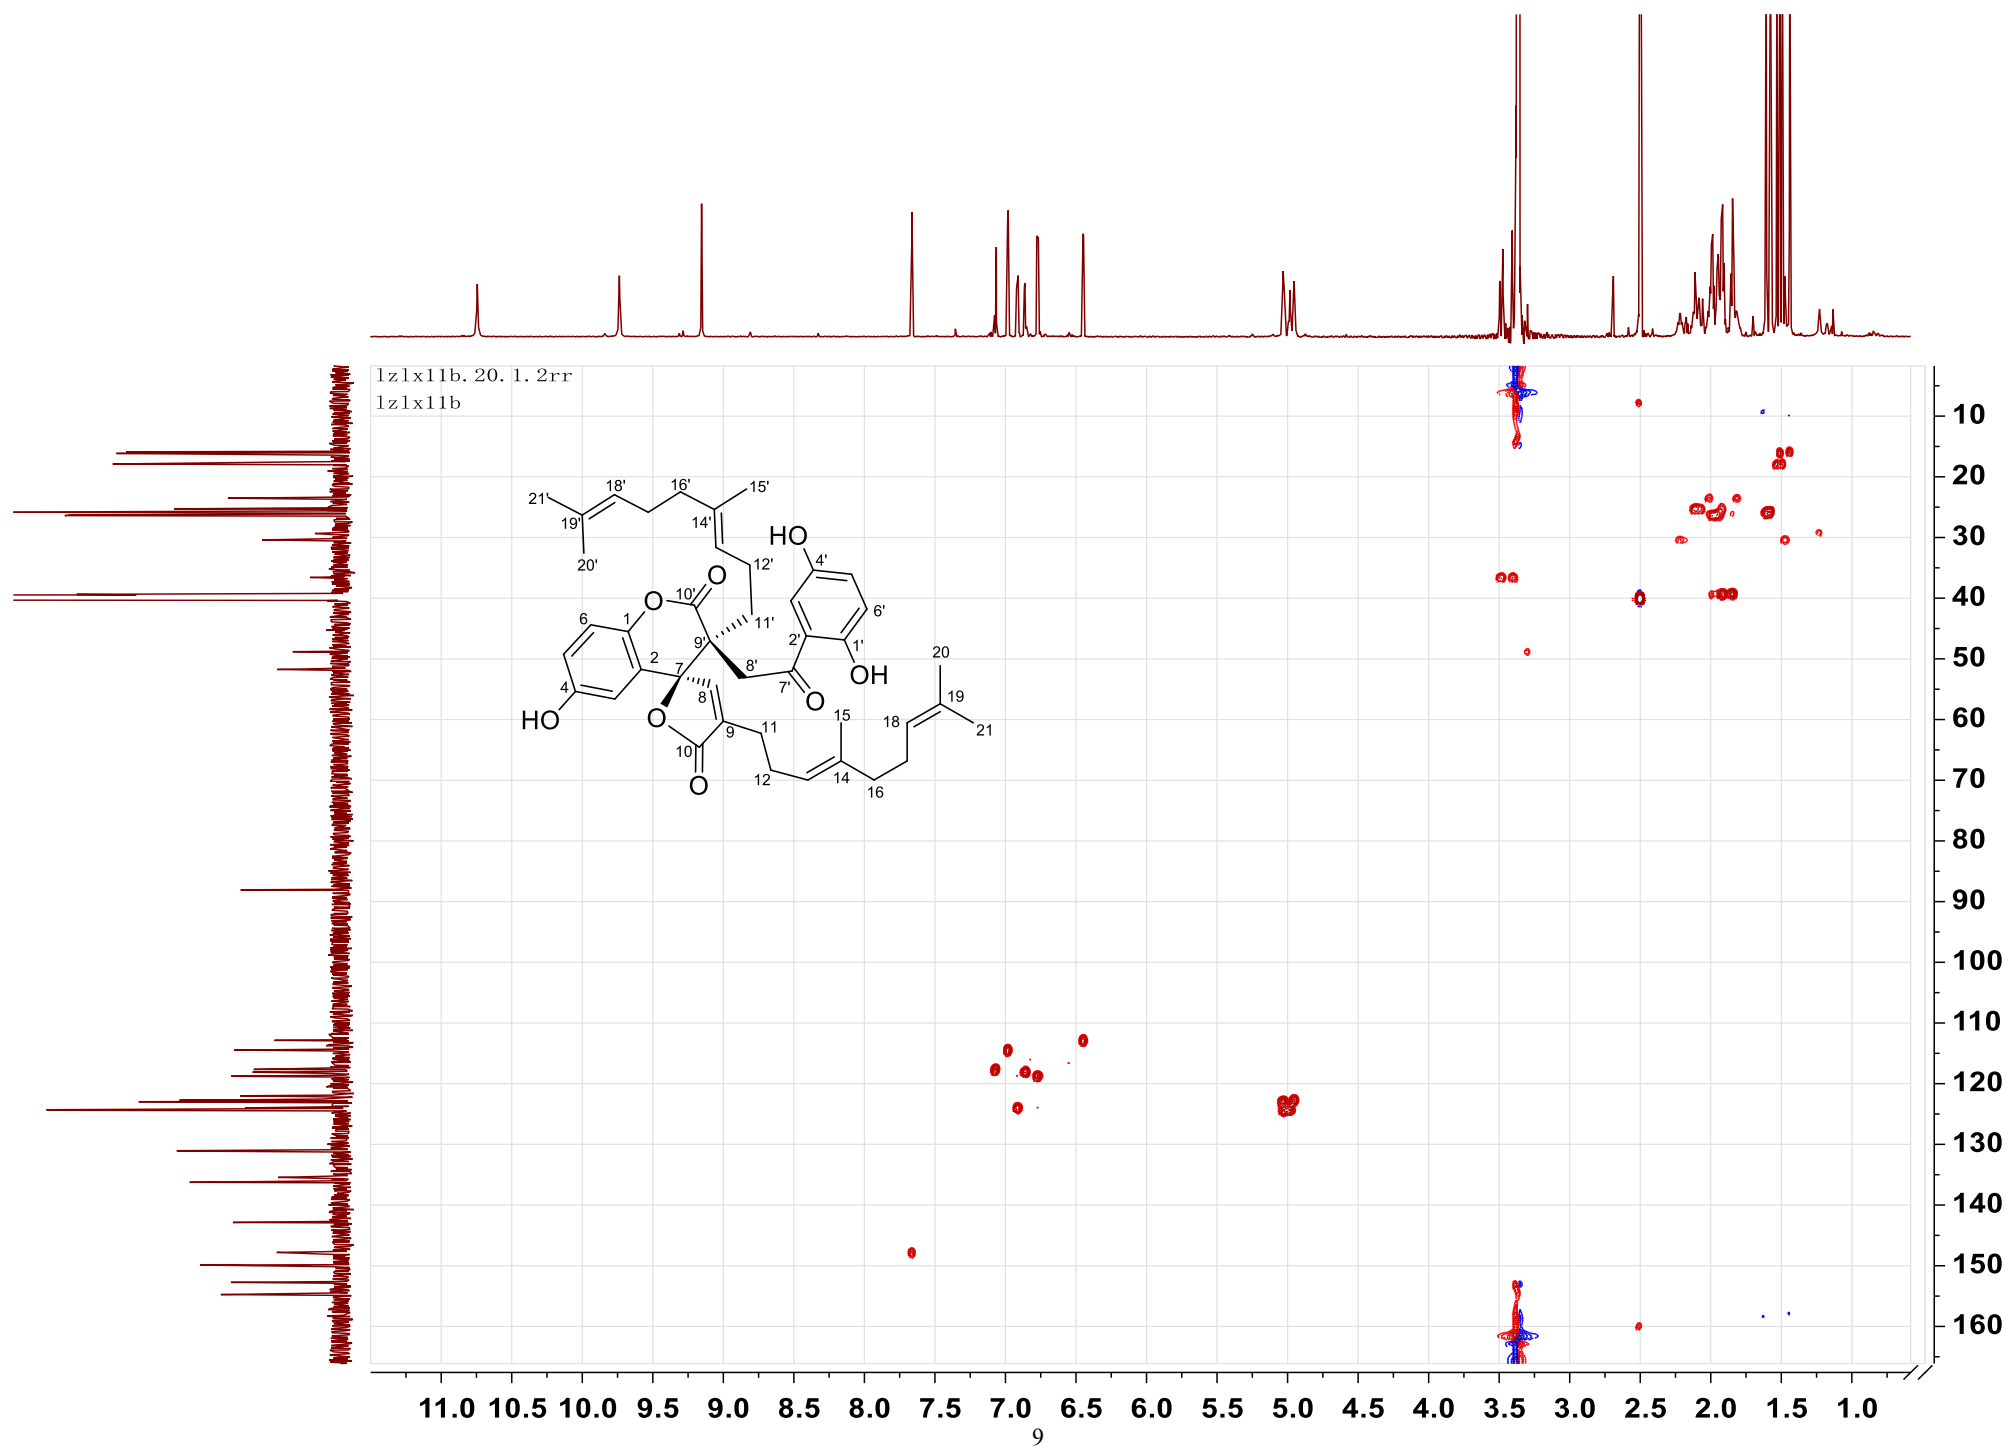

**Fig. 6S** Enlarged HSQC spectra of **1** (DMSO-*d*<sub>6</sub>)

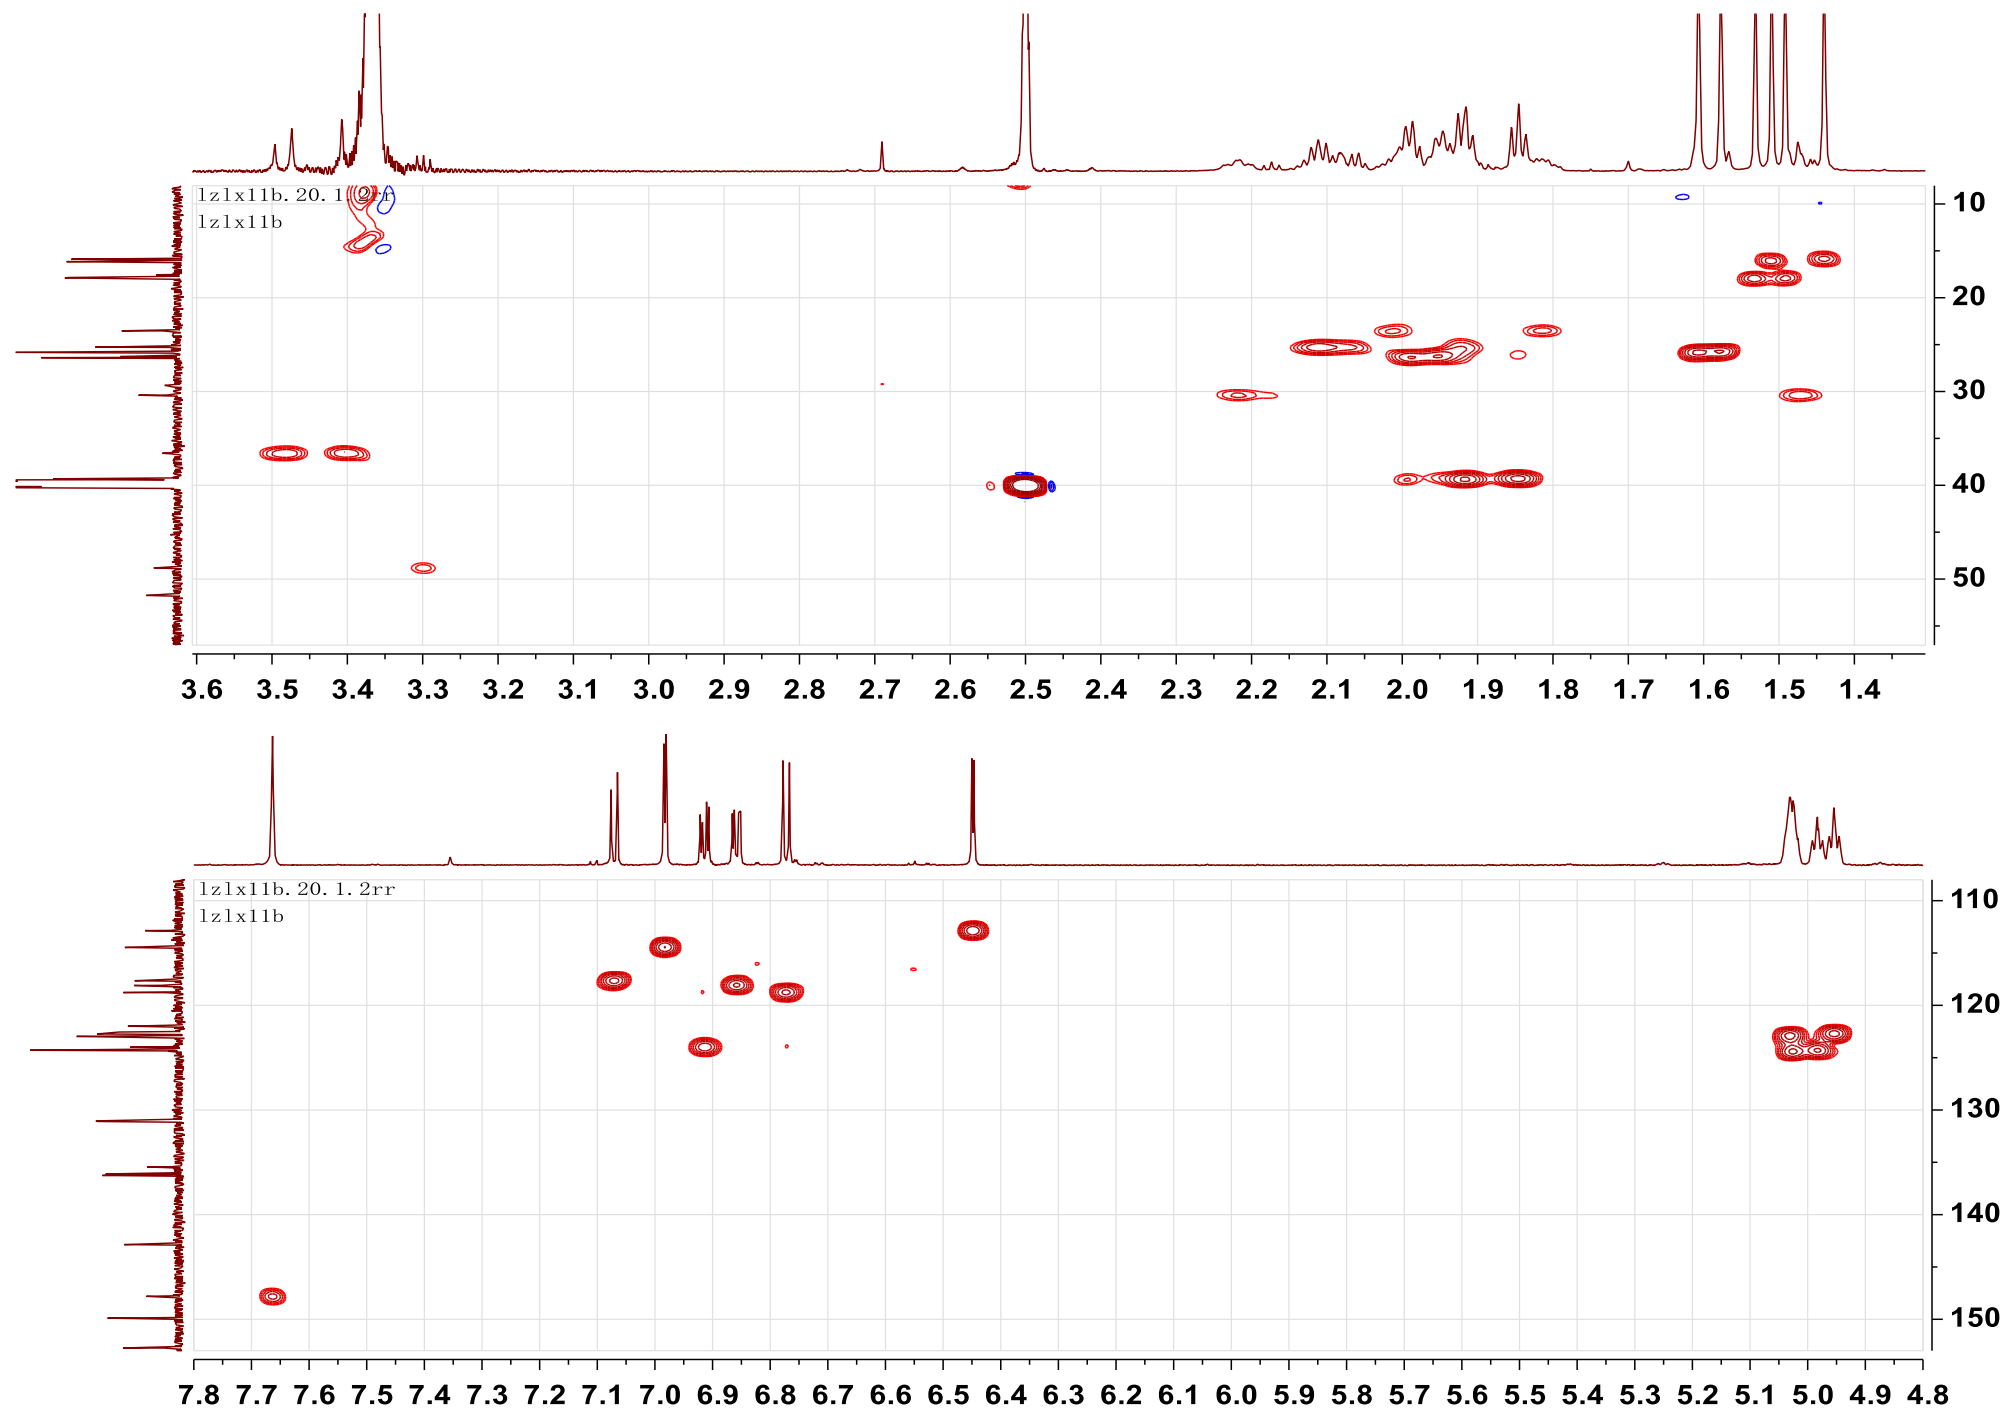

Fig. 7S  $^1\text{H}$ - $^1\text{H}$  COSY spectrum of **1** (DMSO- $d_6$ )

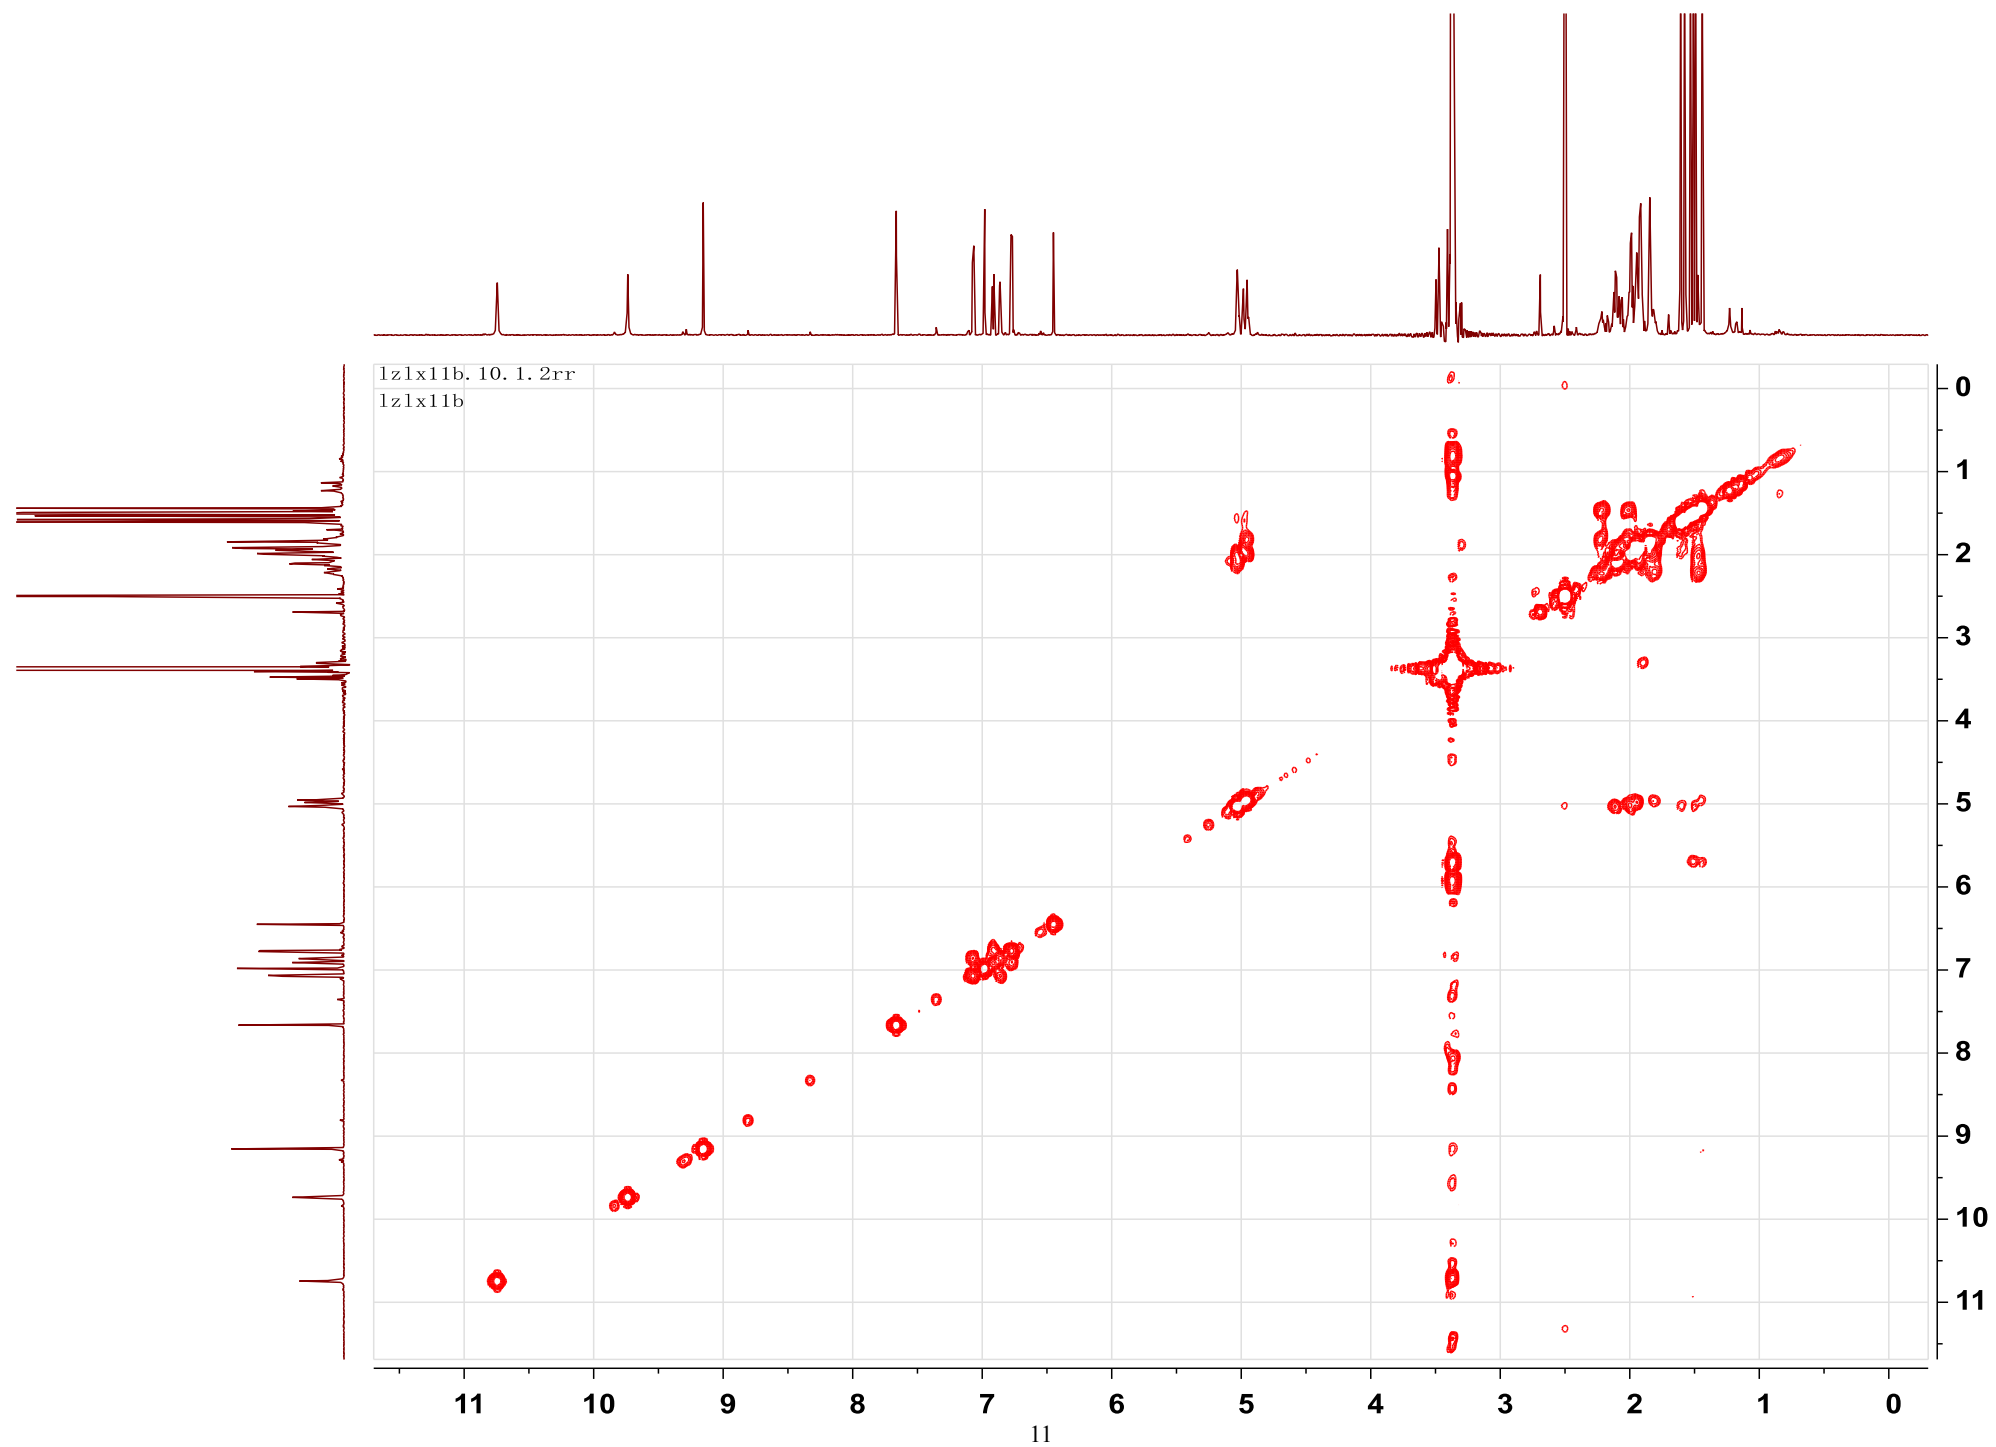

**Fig. 8S** Enlarged  $^1\text{H}$ - $^1\text{H}$  COSY spectra of **1** (DMSO- $d_6$ )

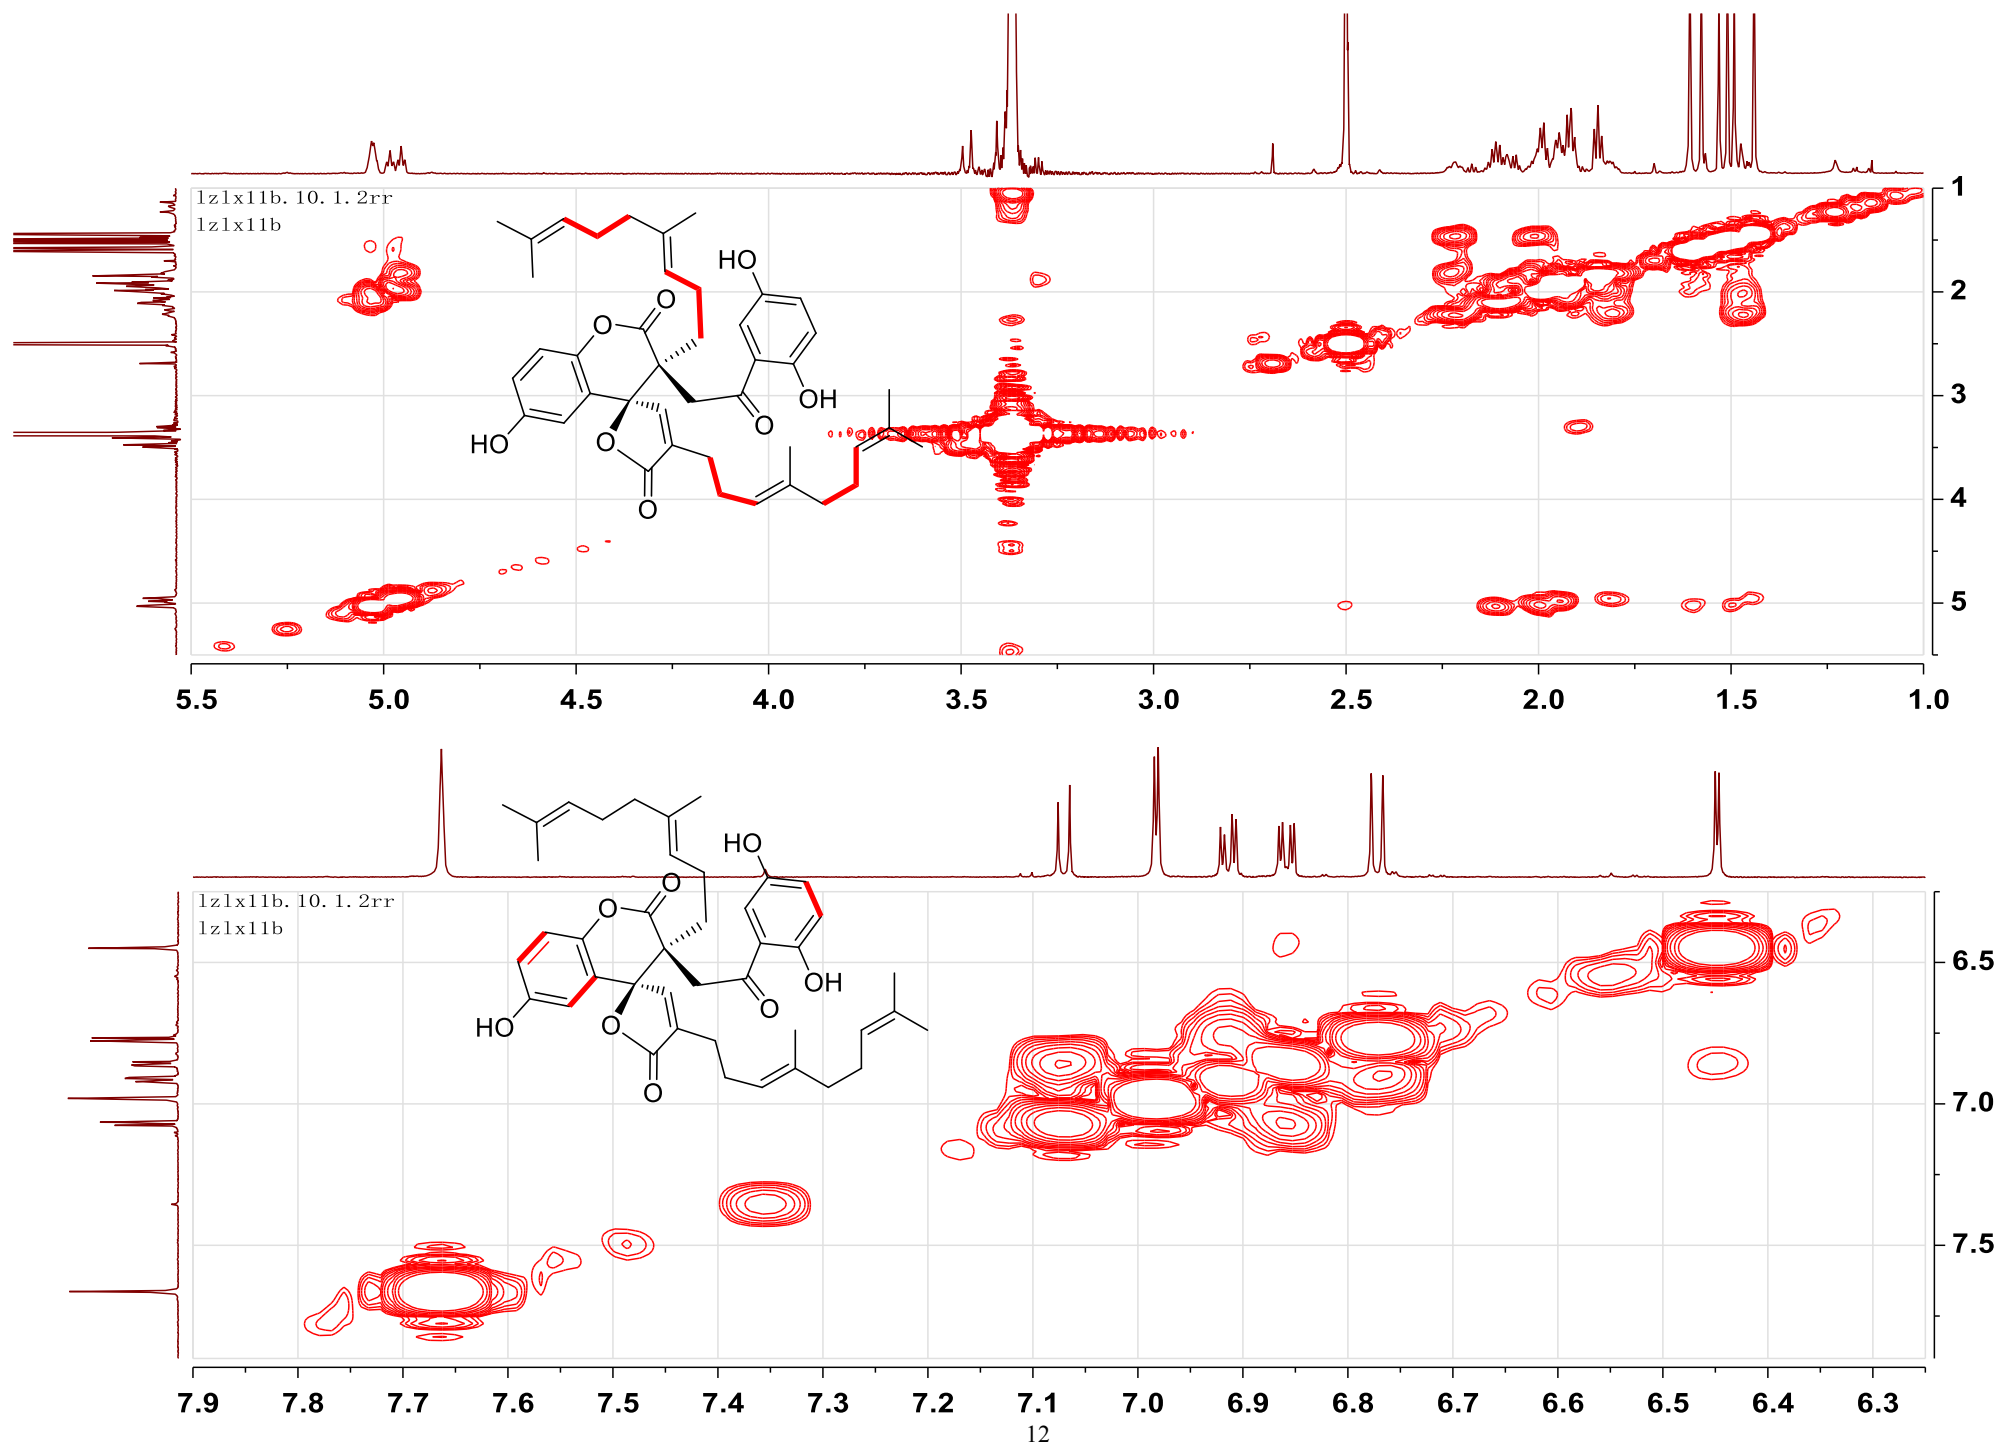

Fig. 9S HMBC spectrum of **1** (DMSO-*d*<sub>6</sub>)

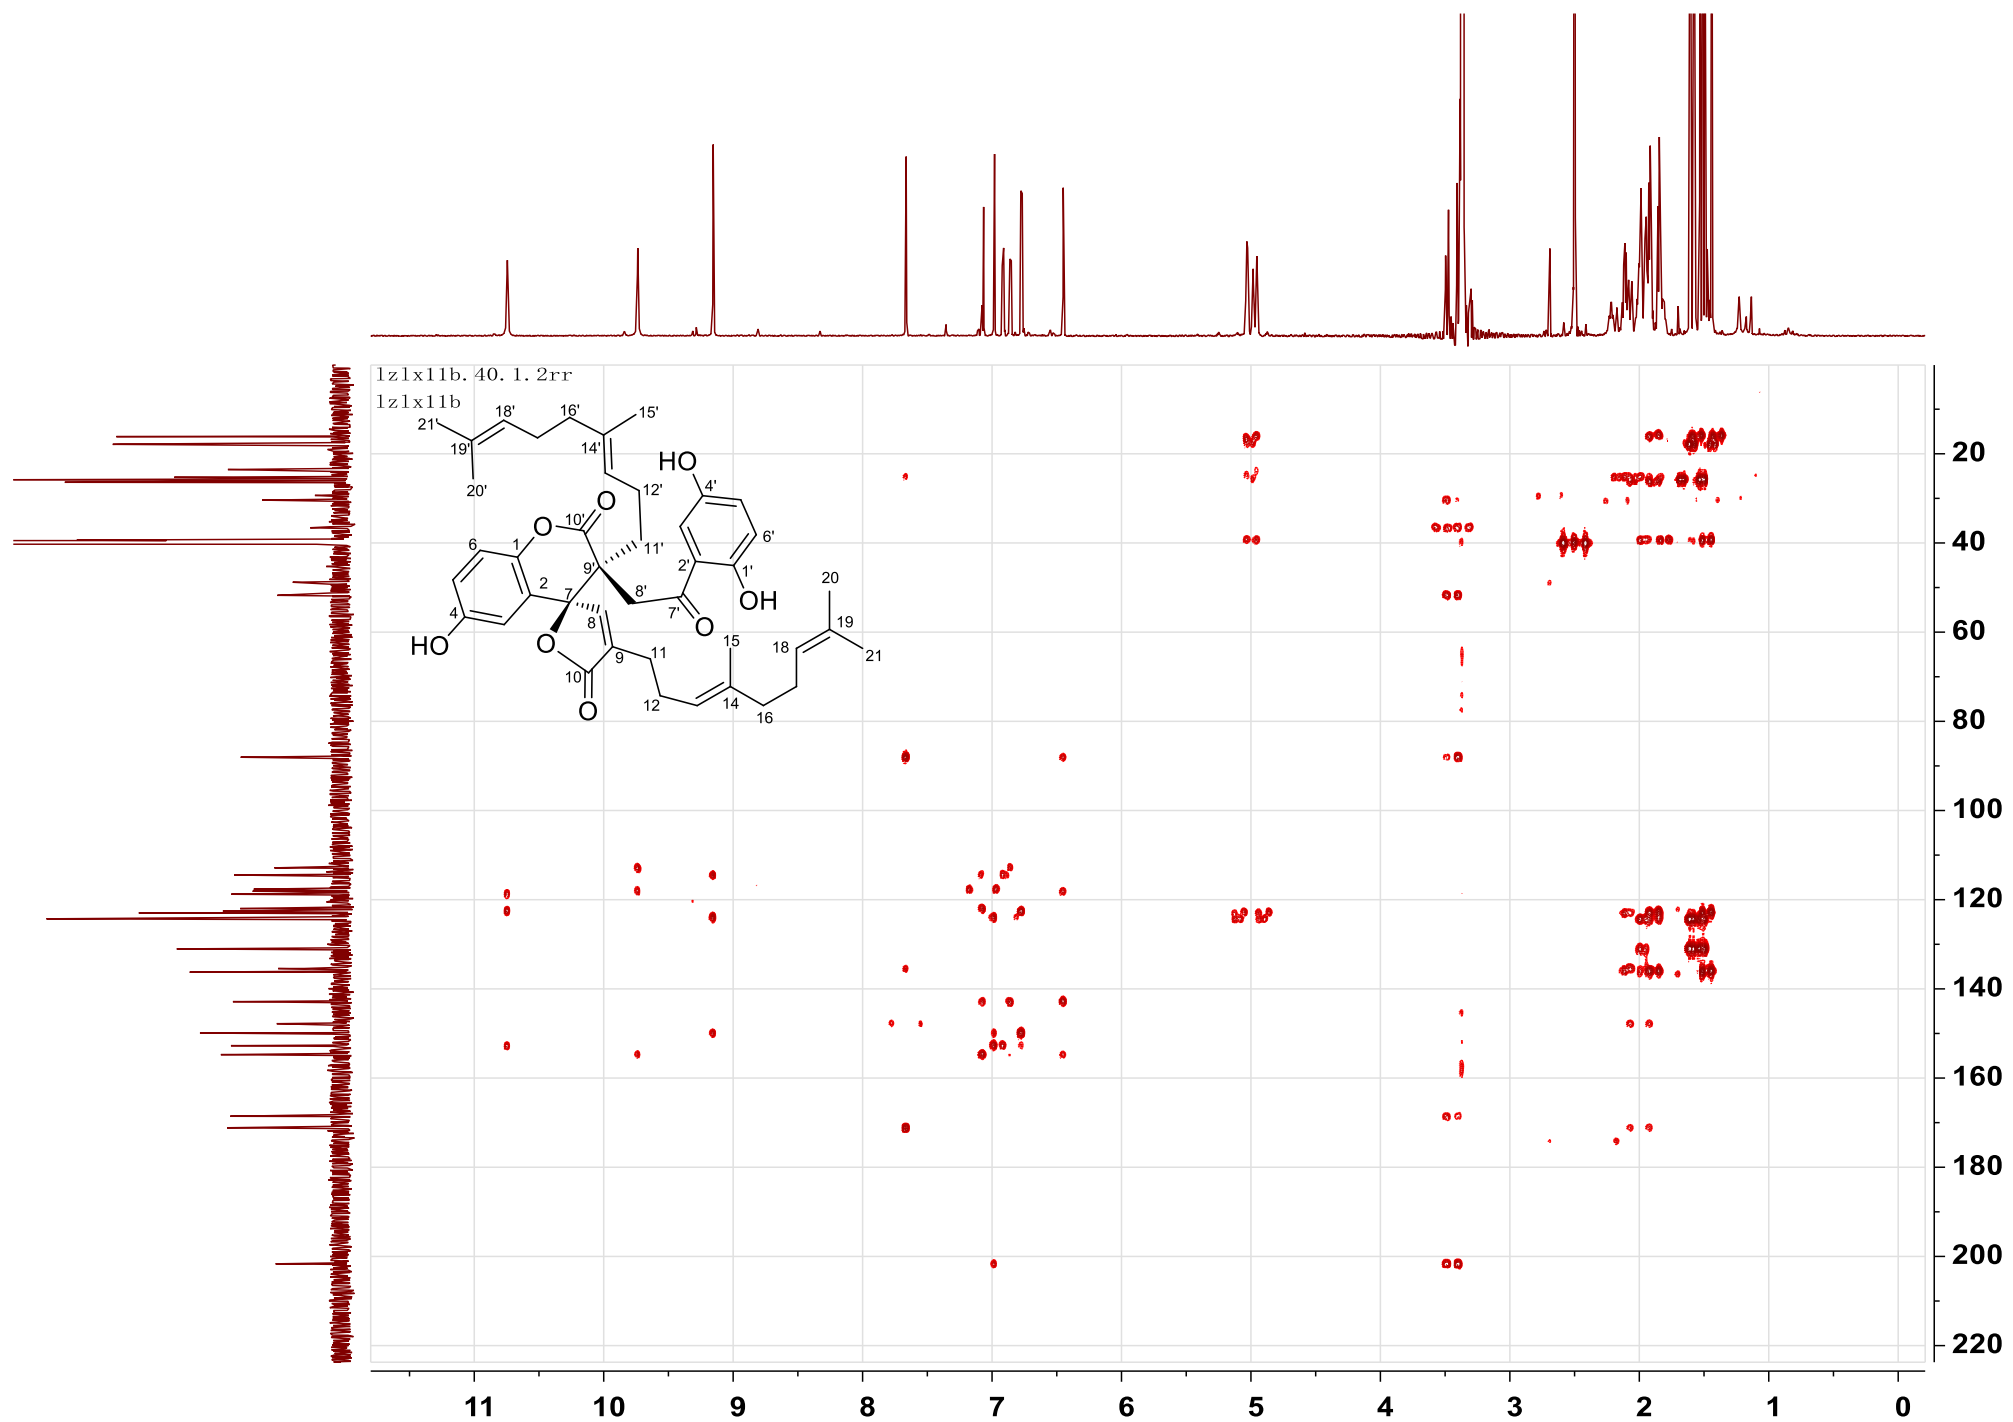

**Fig. 10S** Enlarged HMBC spectra of **1** (DMSO-*d*<sub>6</sub>) (a)

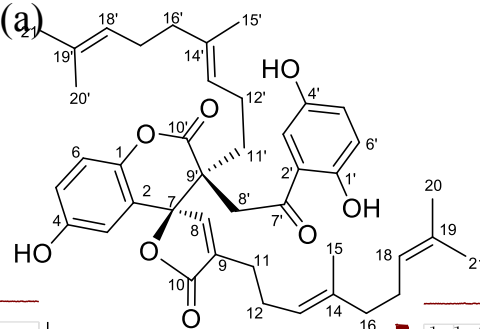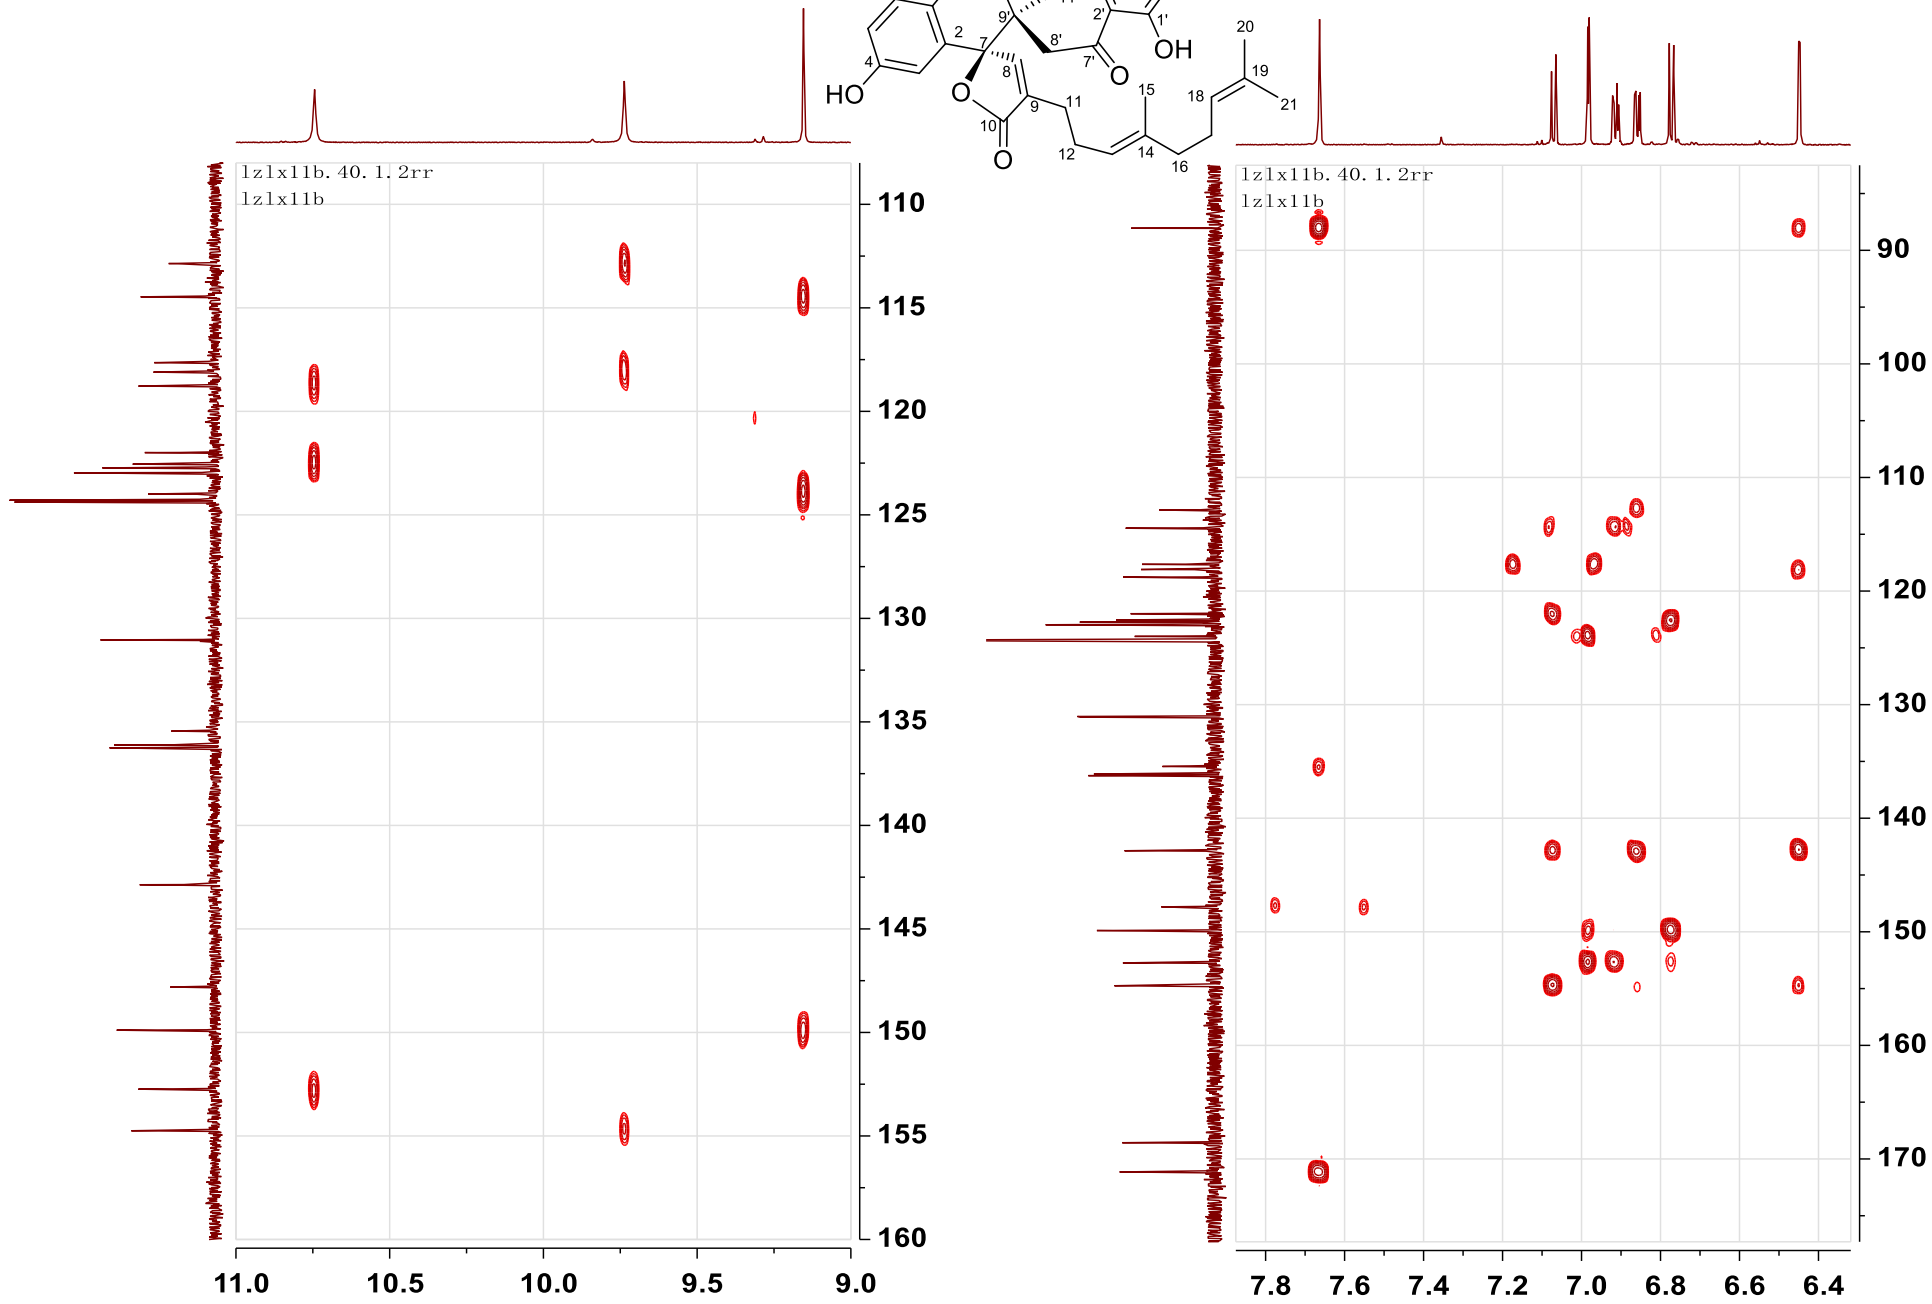

Fig. 11S Enlarged HMBC spectrum of **1** (DMSO-*d*<sub>6</sub>) (b)

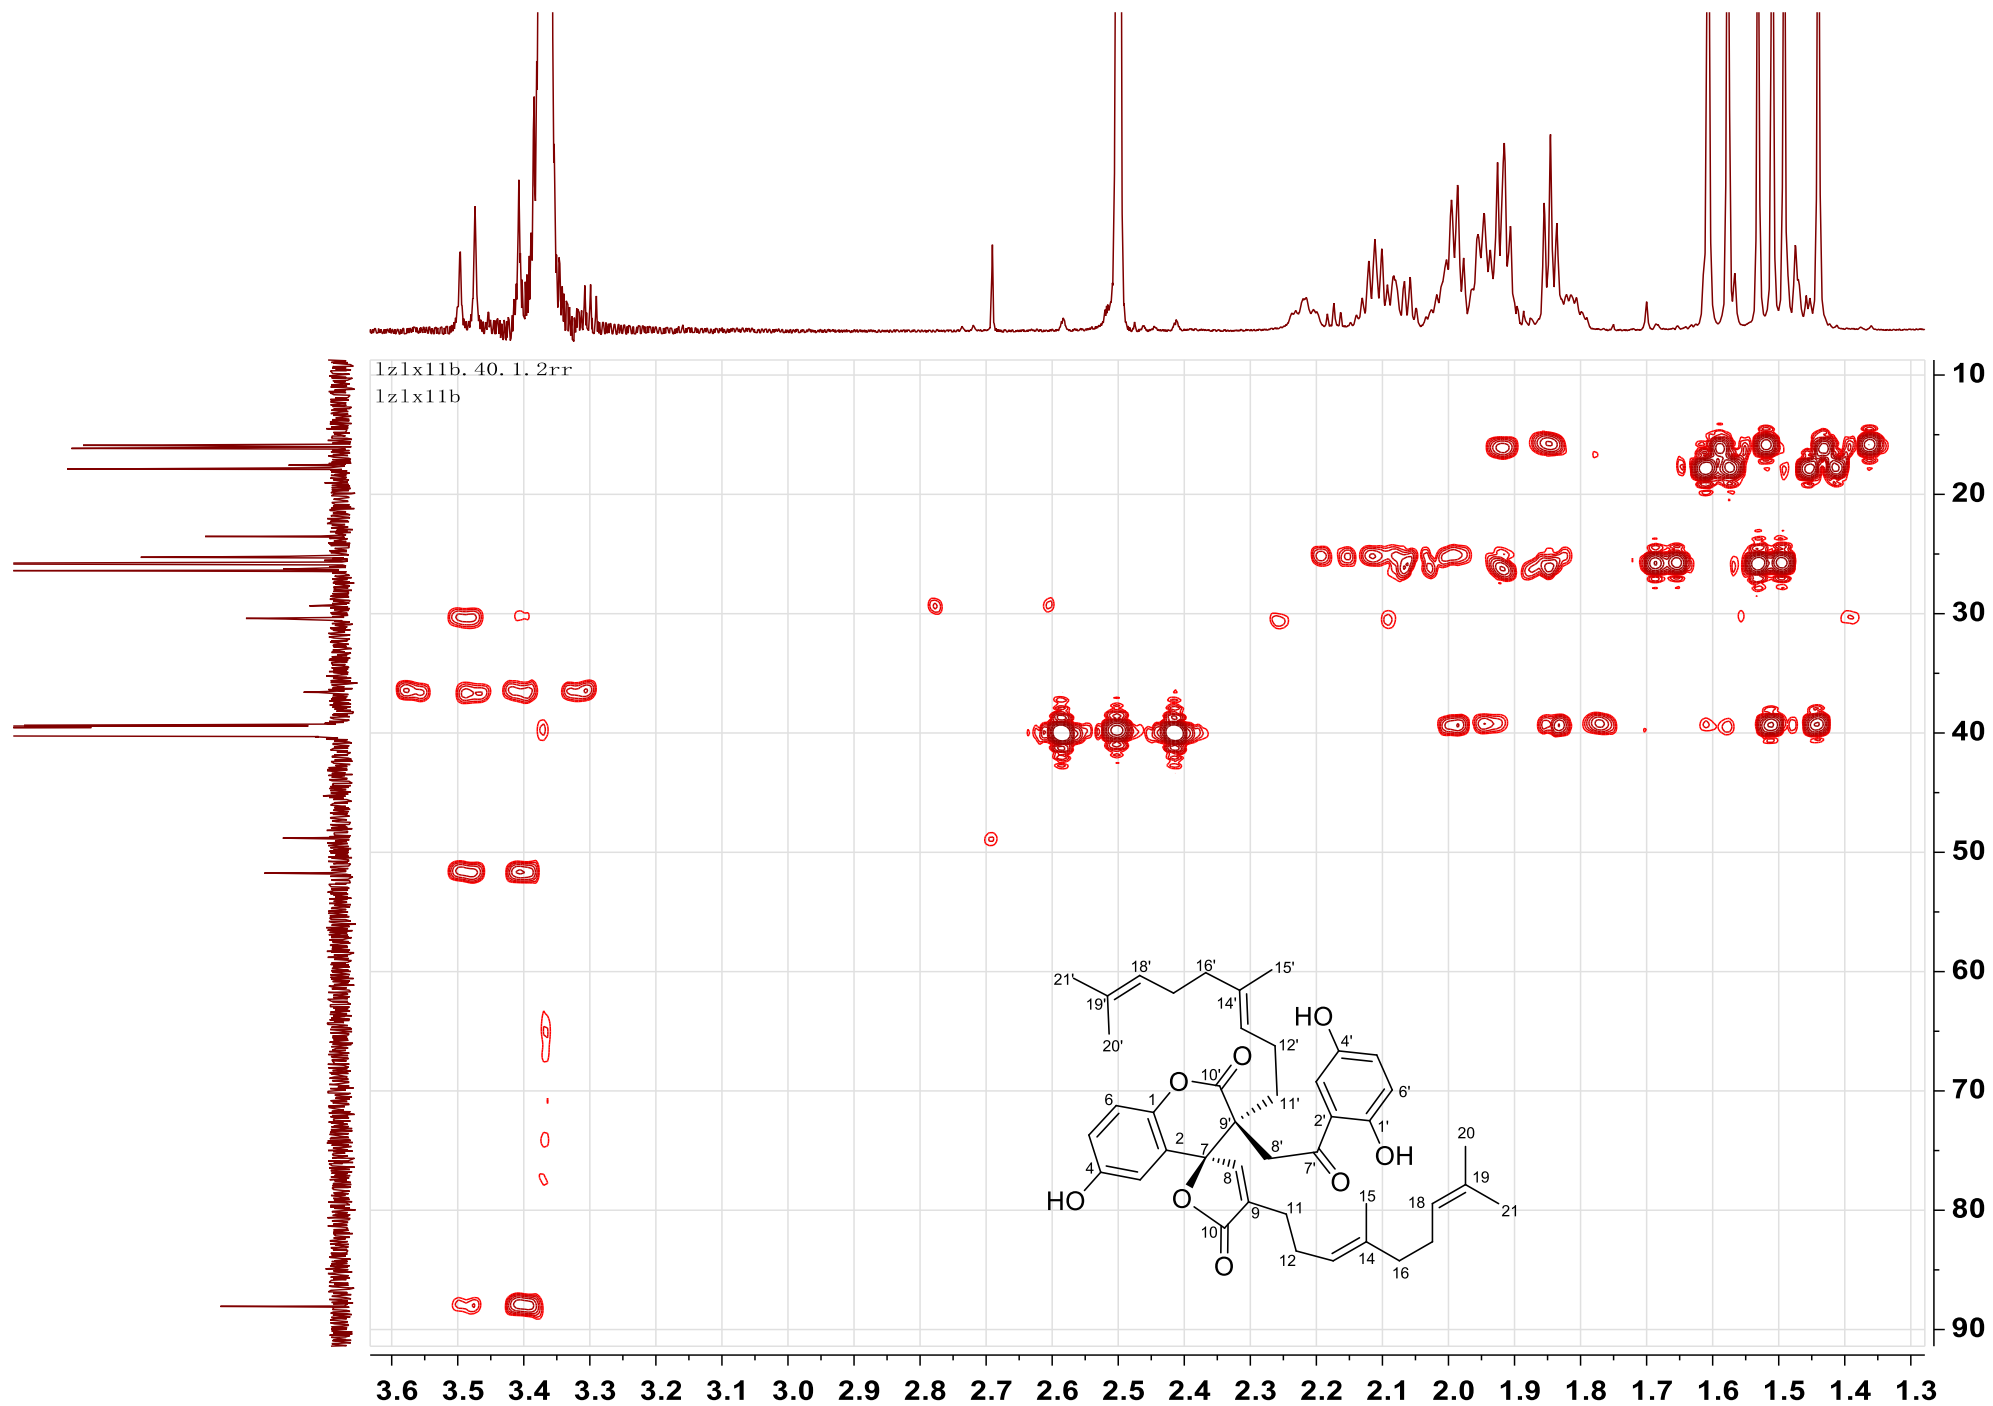

**Fig. 12S** Enlarged HMBC spectrum of **1** (DMSO-*d*<sub>6</sub>) (c)

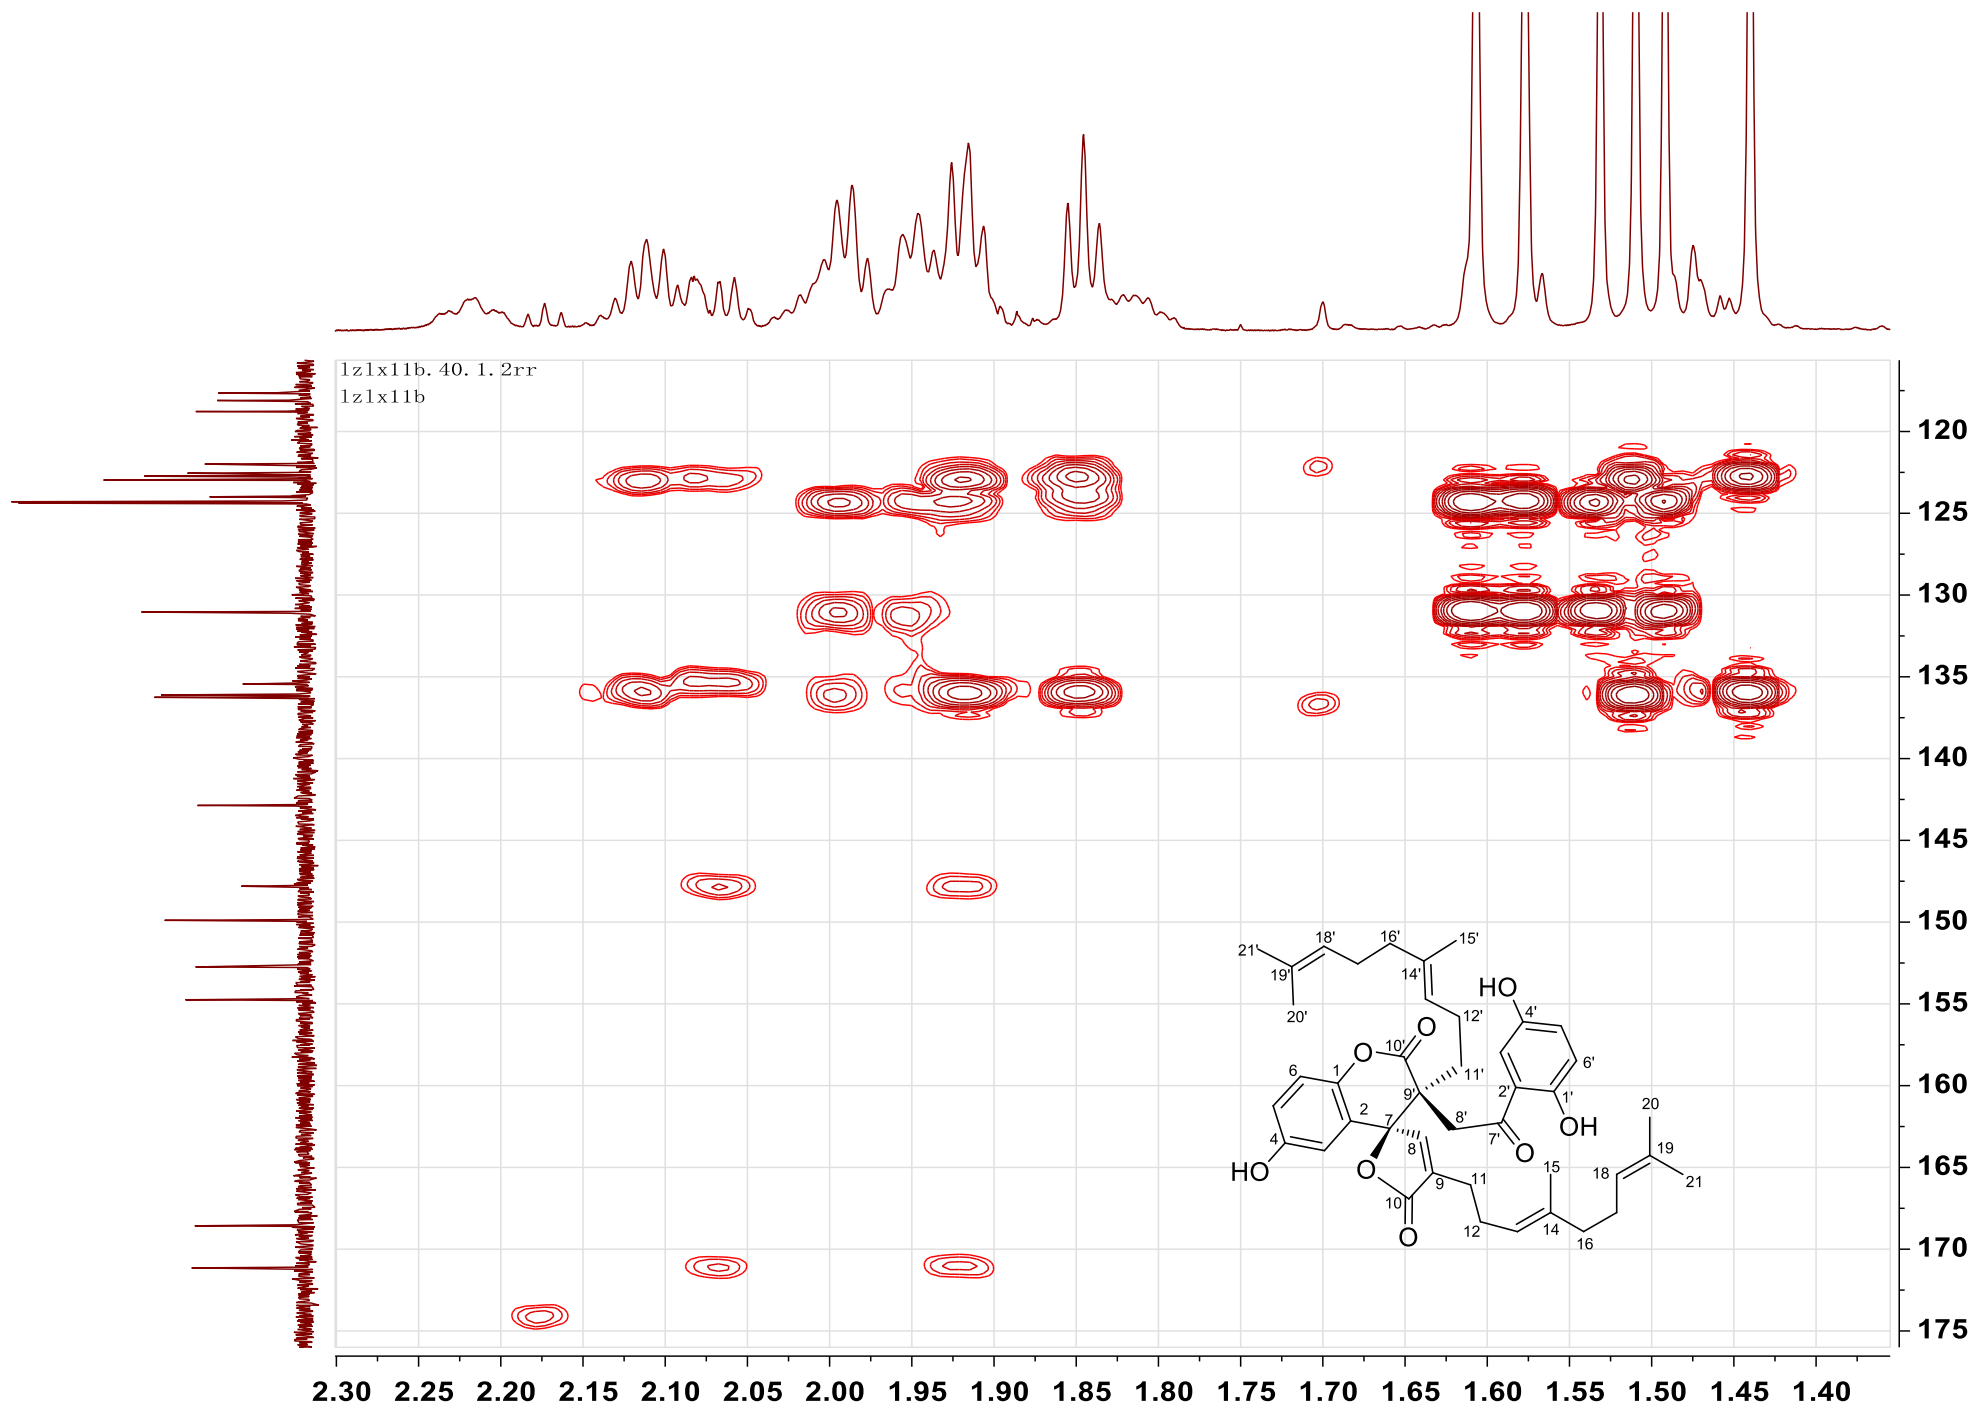



Fig. 13S ROESY spectrum of **1** (DMSO-*d*<sub>6</sub>)

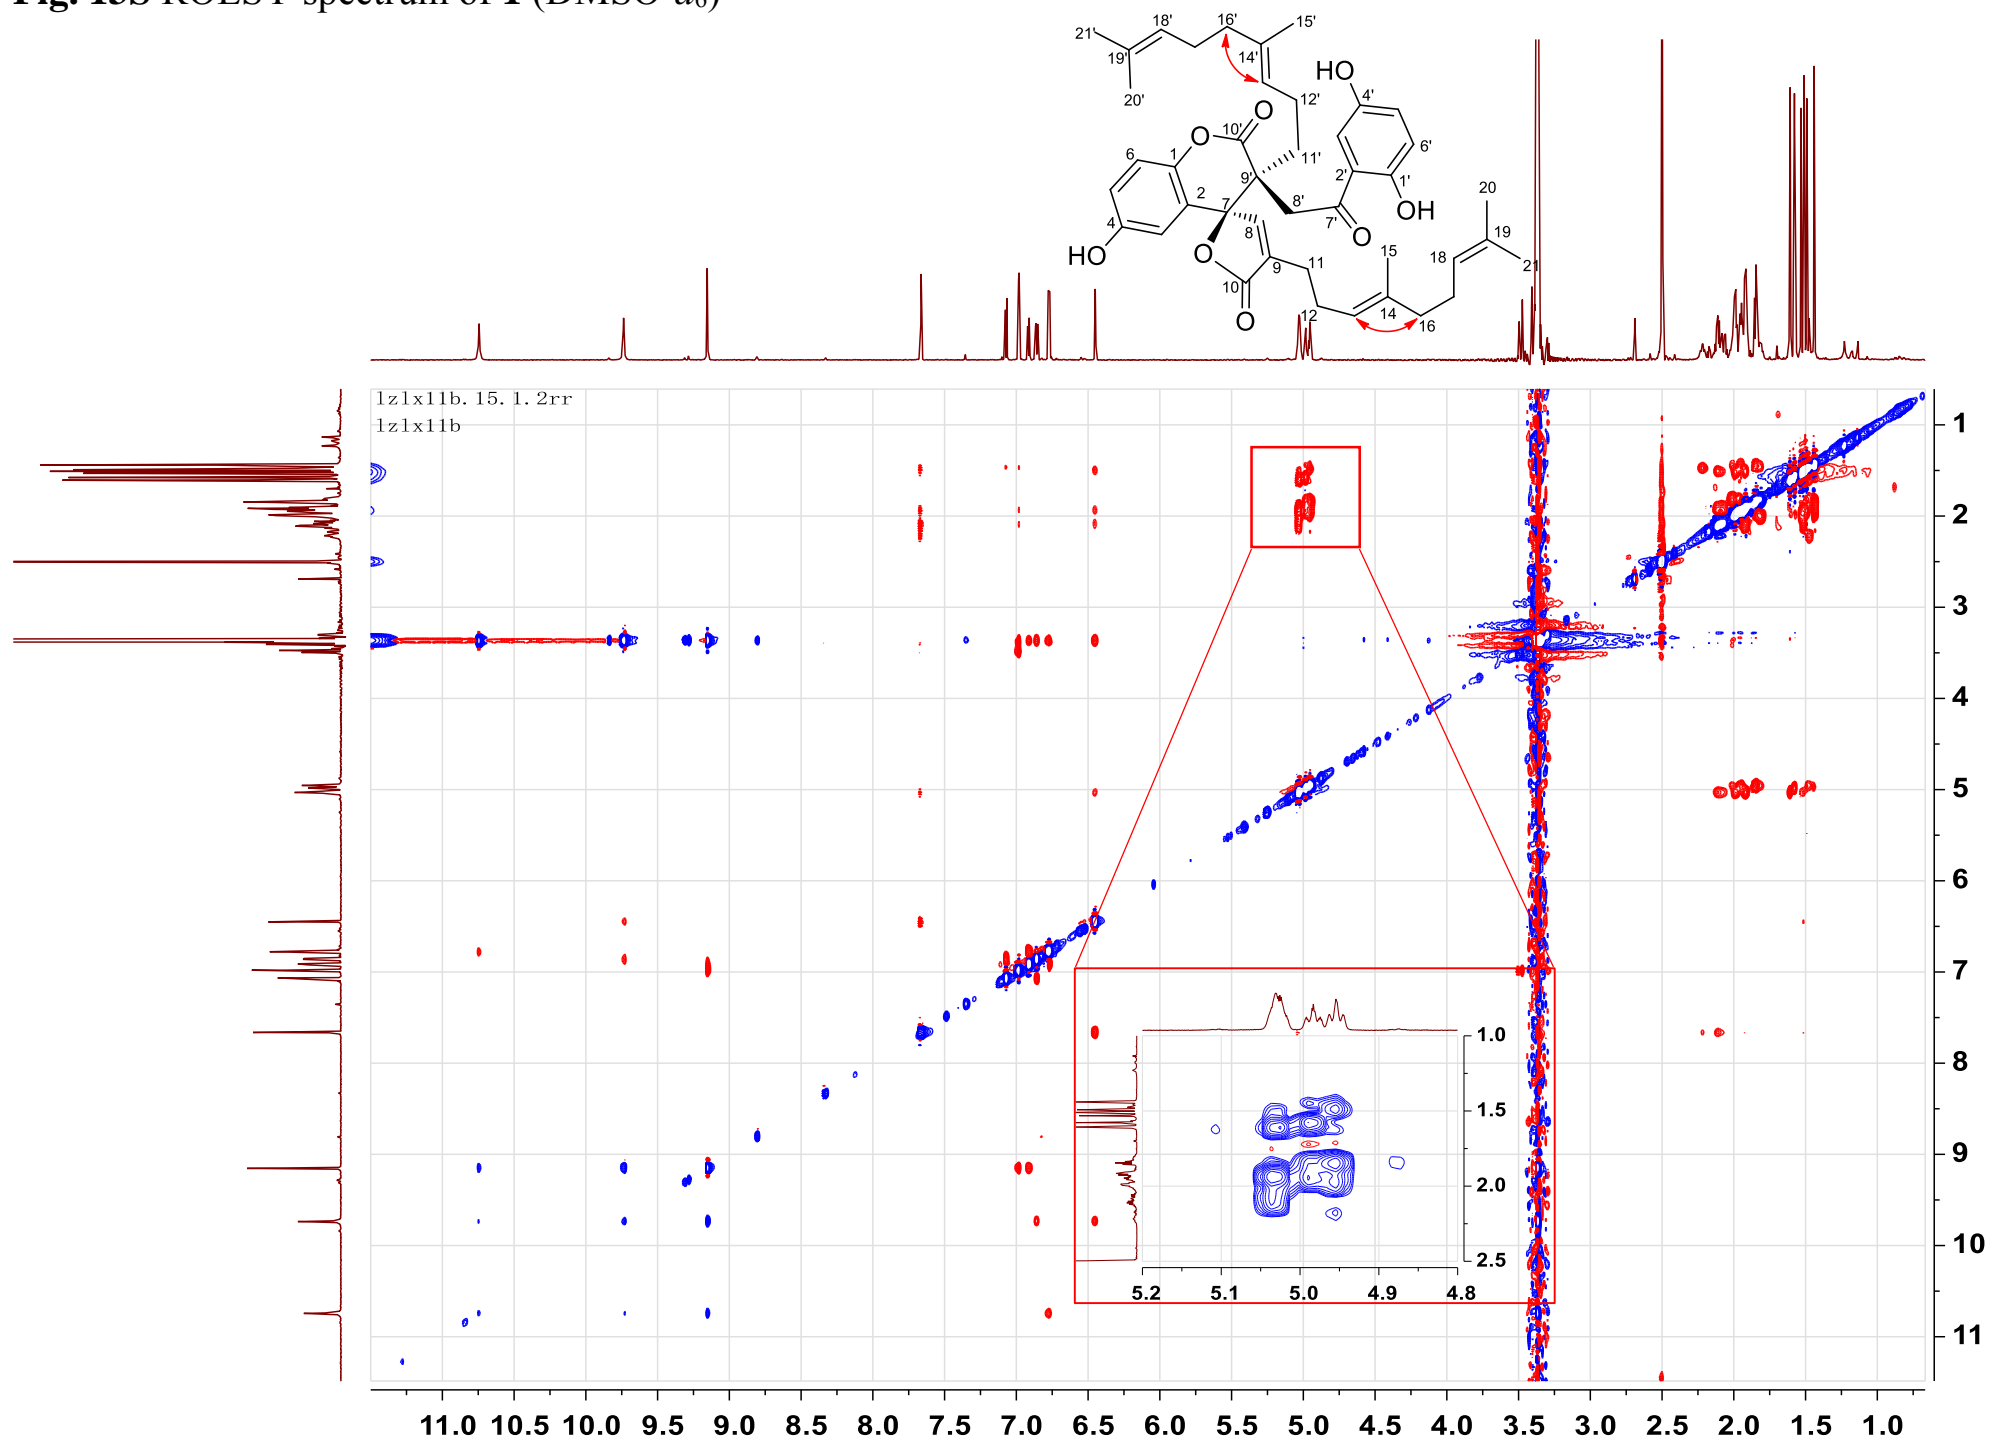

**Fig. 14S** Enlarged ROESY spectra of **1** (DMSO-*d*<sub>6</sub>)

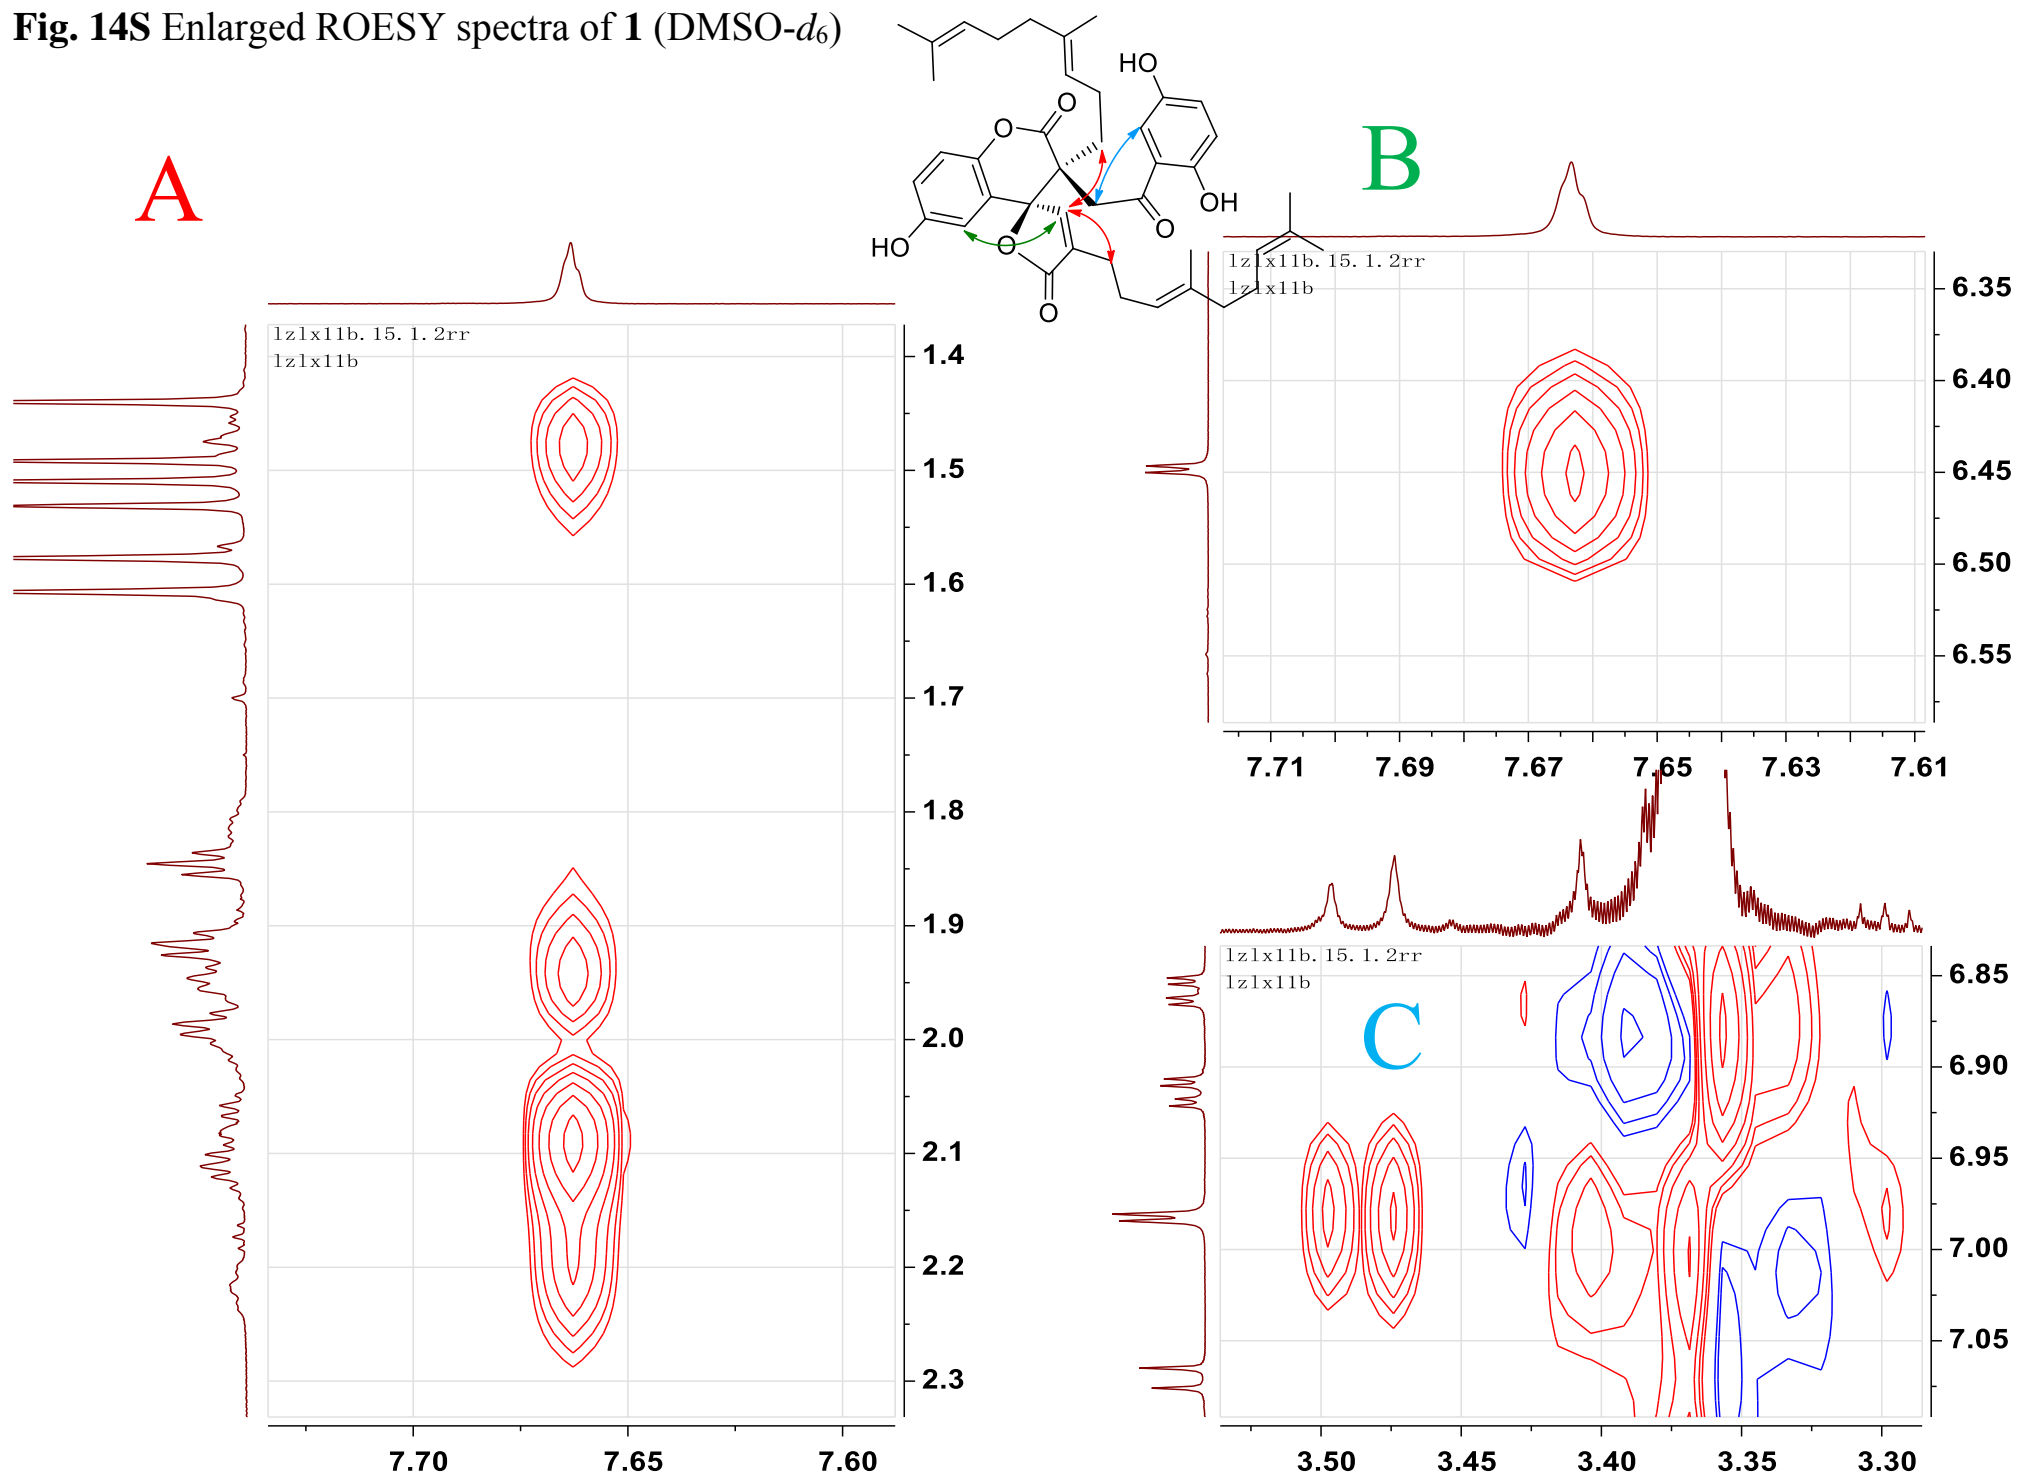

Fig. 15S <sup>1</sup>H NMR spectrum of **1** (CDCl<sub>3</sub>)

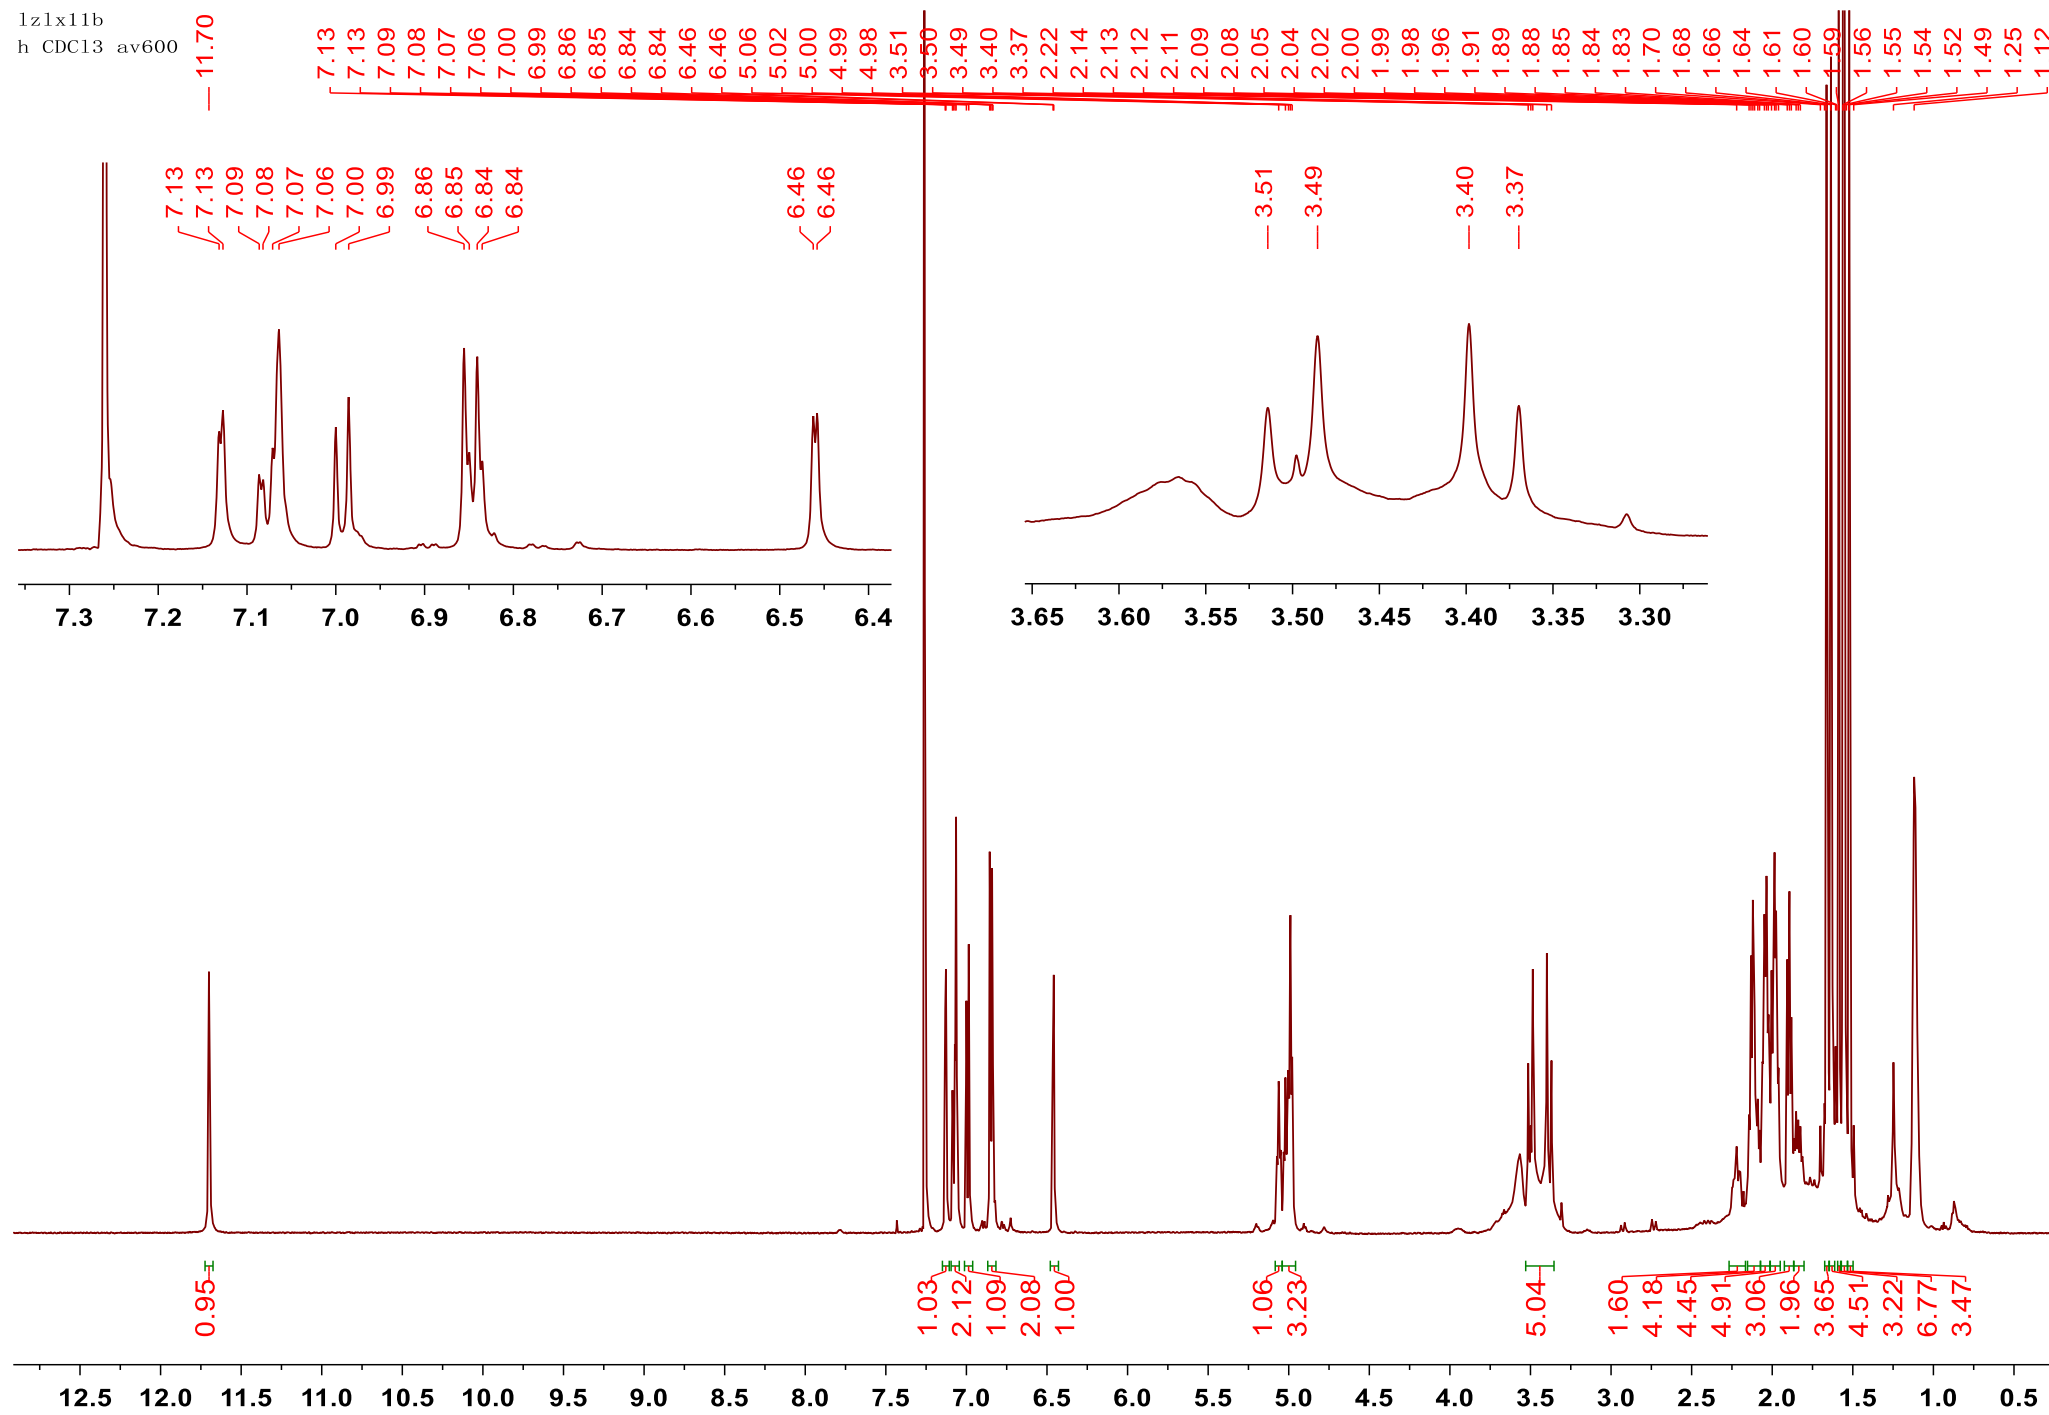

**Fig. 16S**  $^{13}\text{C}$  NMR and DEPT spectra of **1** ( $\text{CDCl}_3$ )

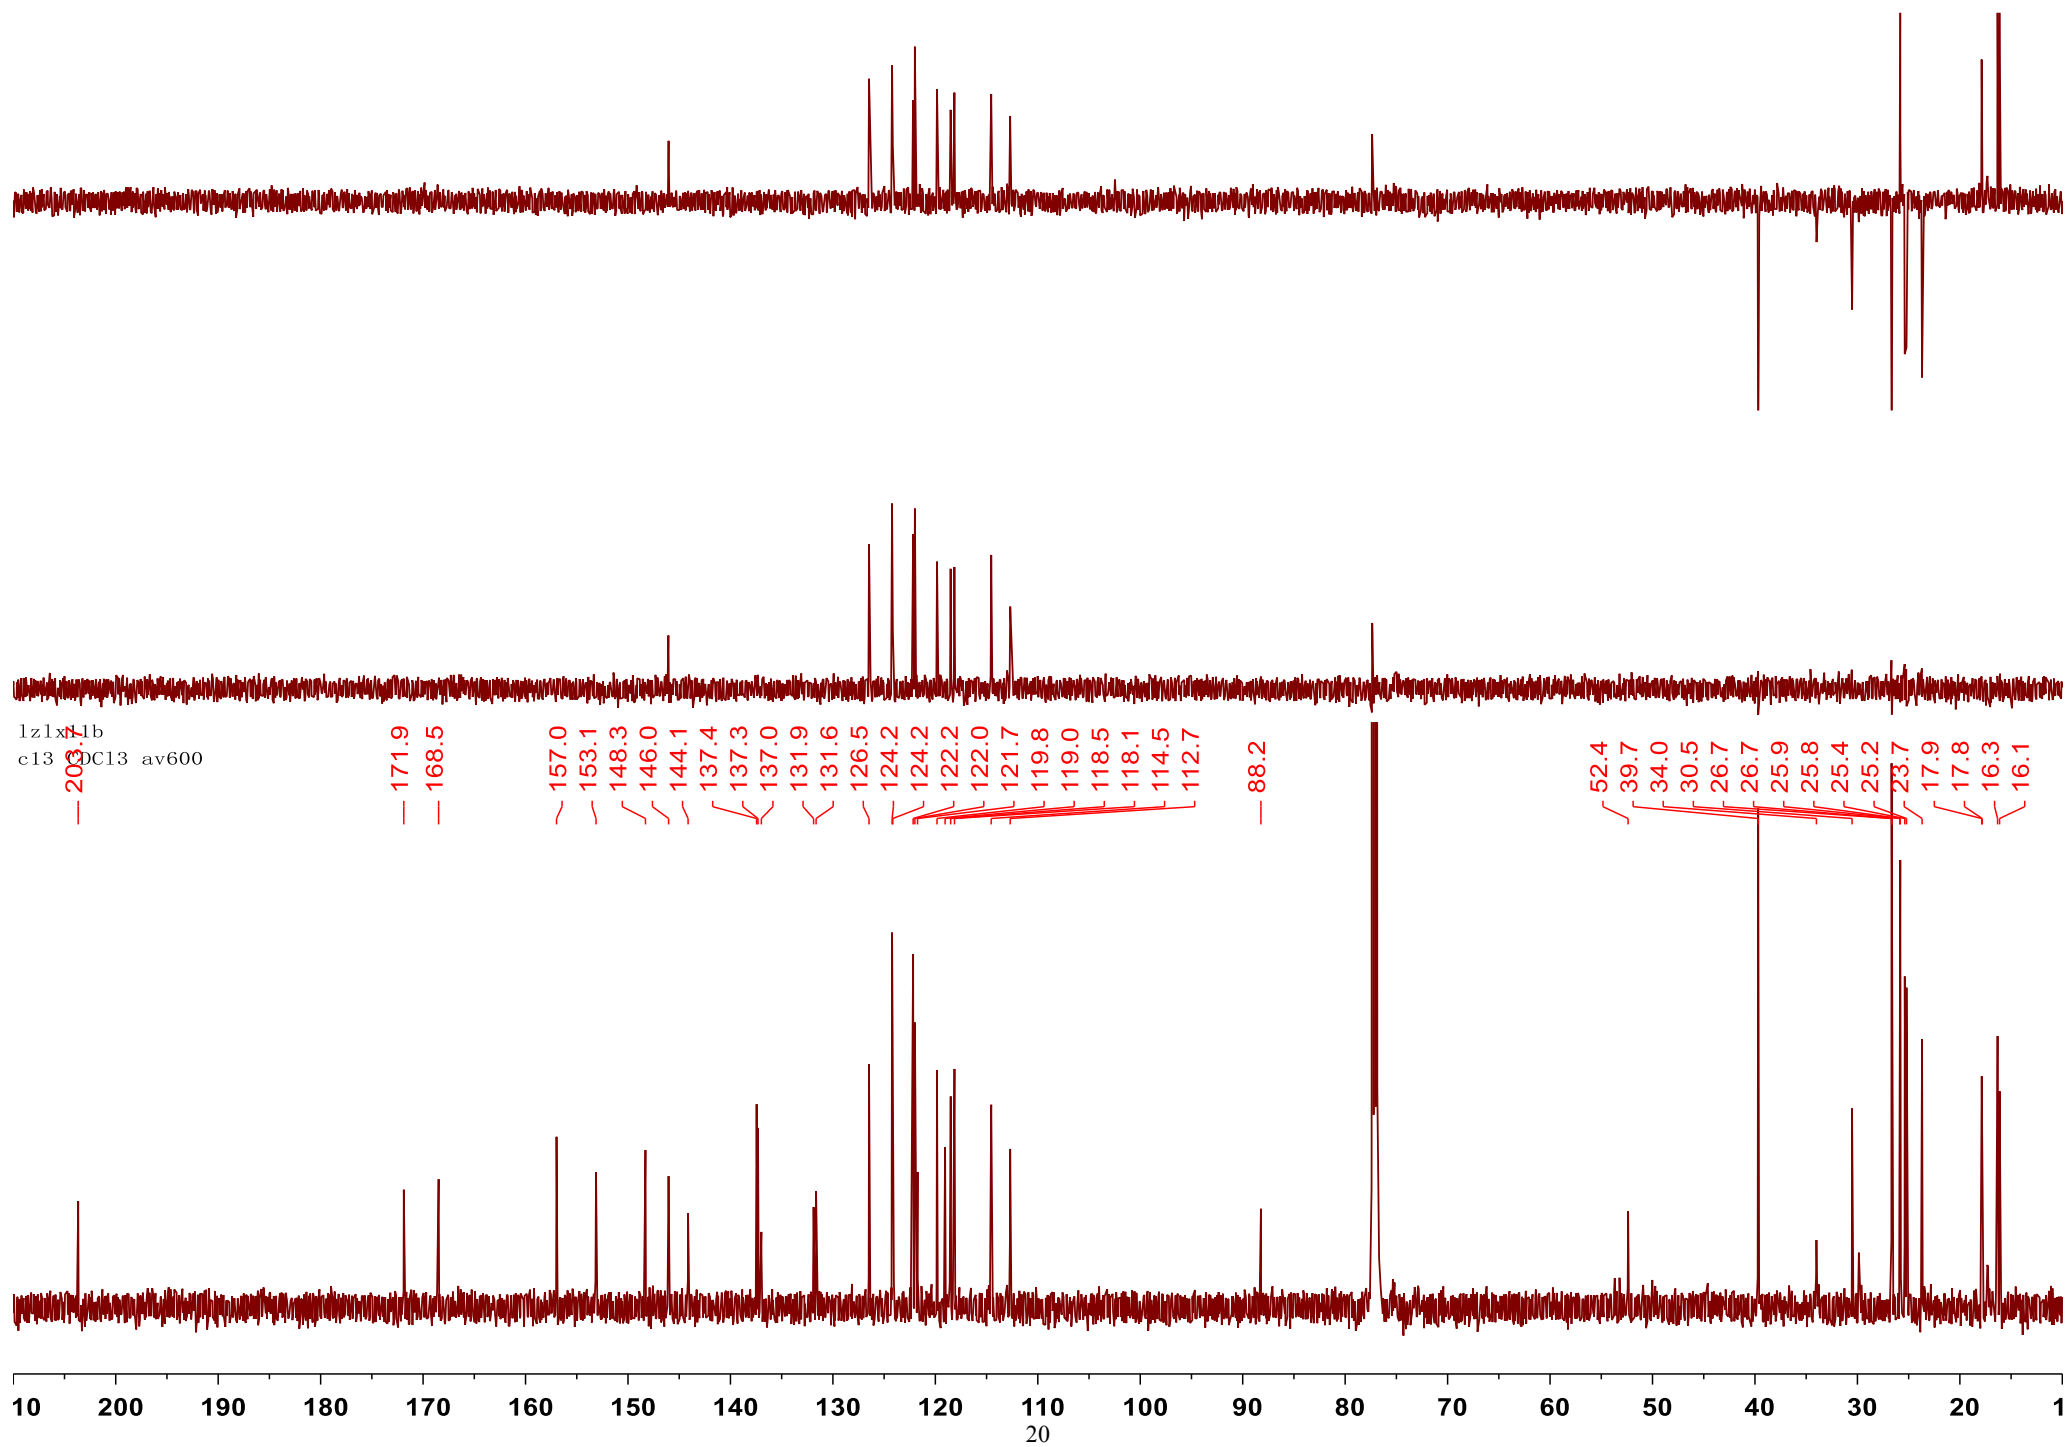

Fig. 17S HSQC spectrum of **1** (CDCl<sub>3</sub>)

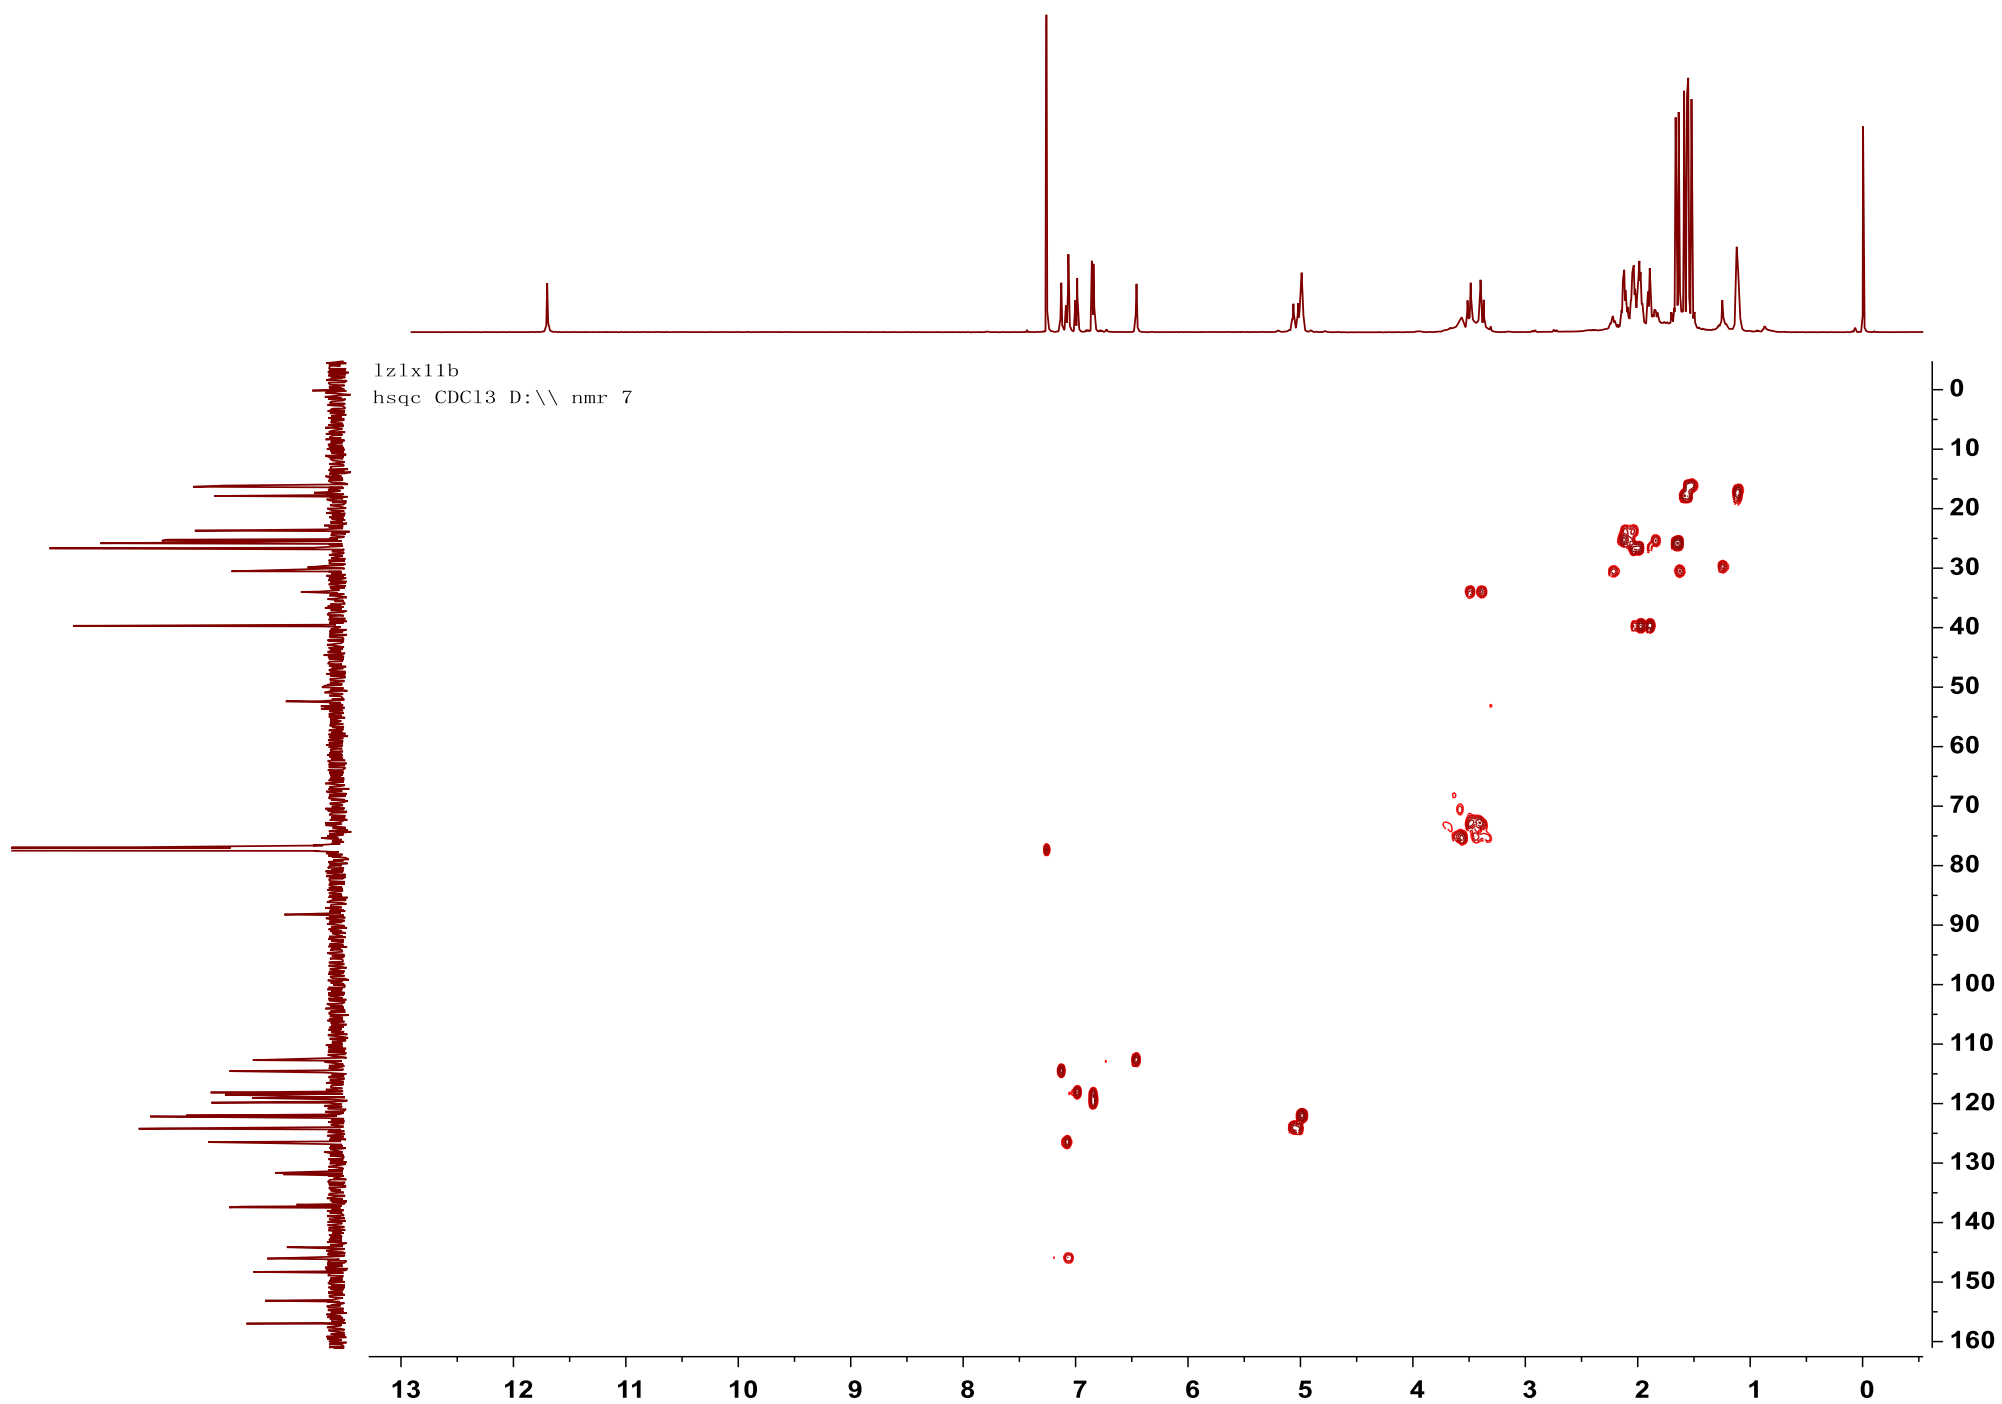

Fig. 18S  $^1\text{H}$ - $^1\text{H}$  COSY spectrum of **1** ( $\text{CDCl}_3$ )

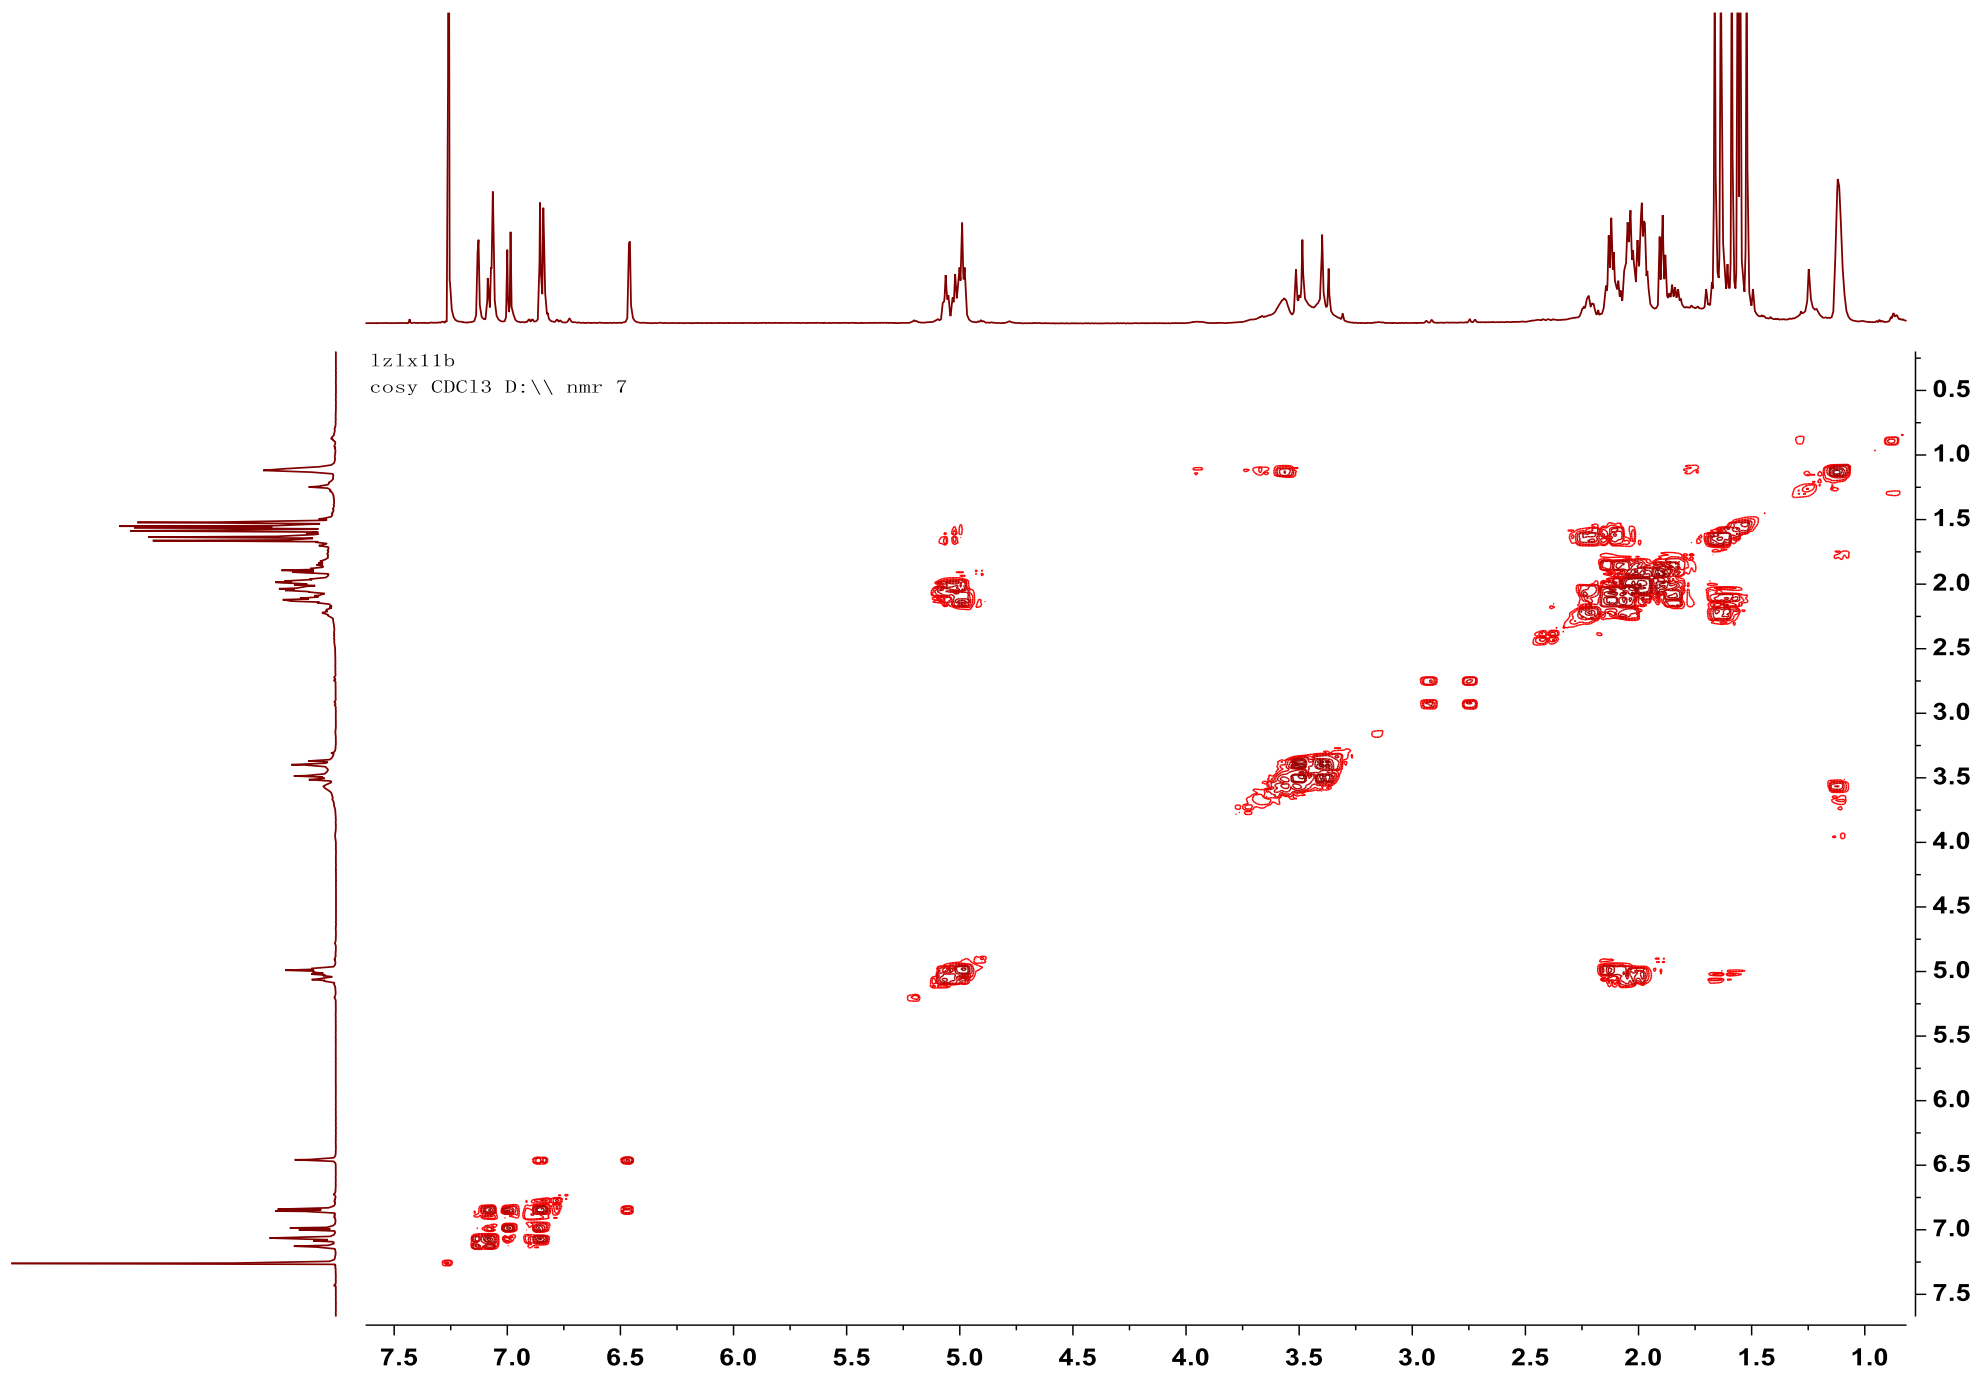

Fig. 19S HMBC spectrum of **1** (CDCl<sub>3</sub>)

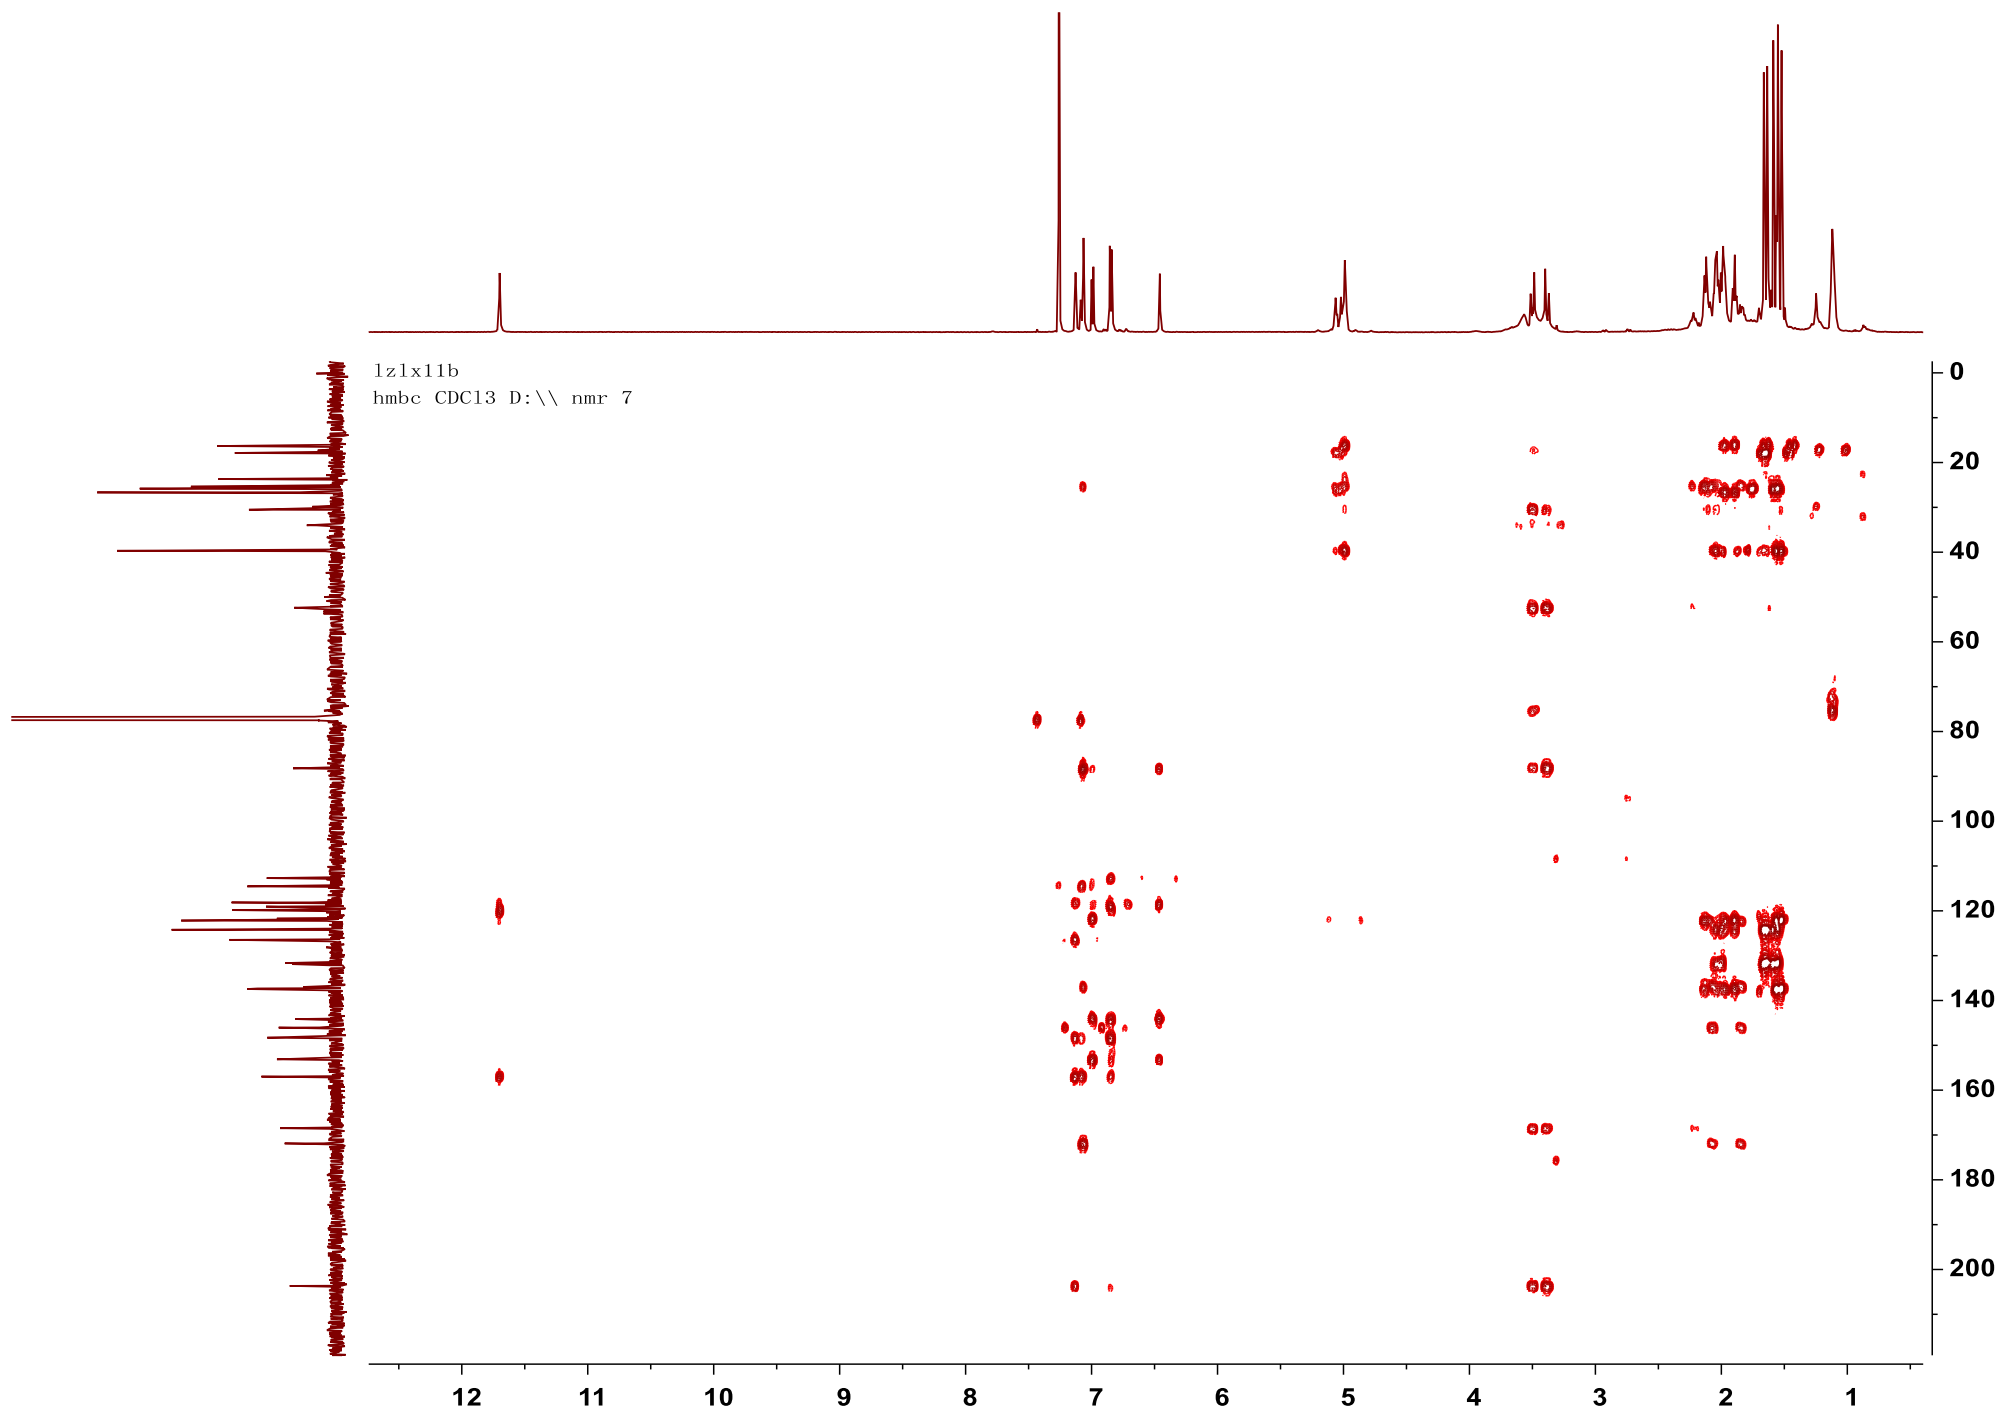

Fig. 20S ROESY spectrum of **1** (CDCl<sub>3</sub>)

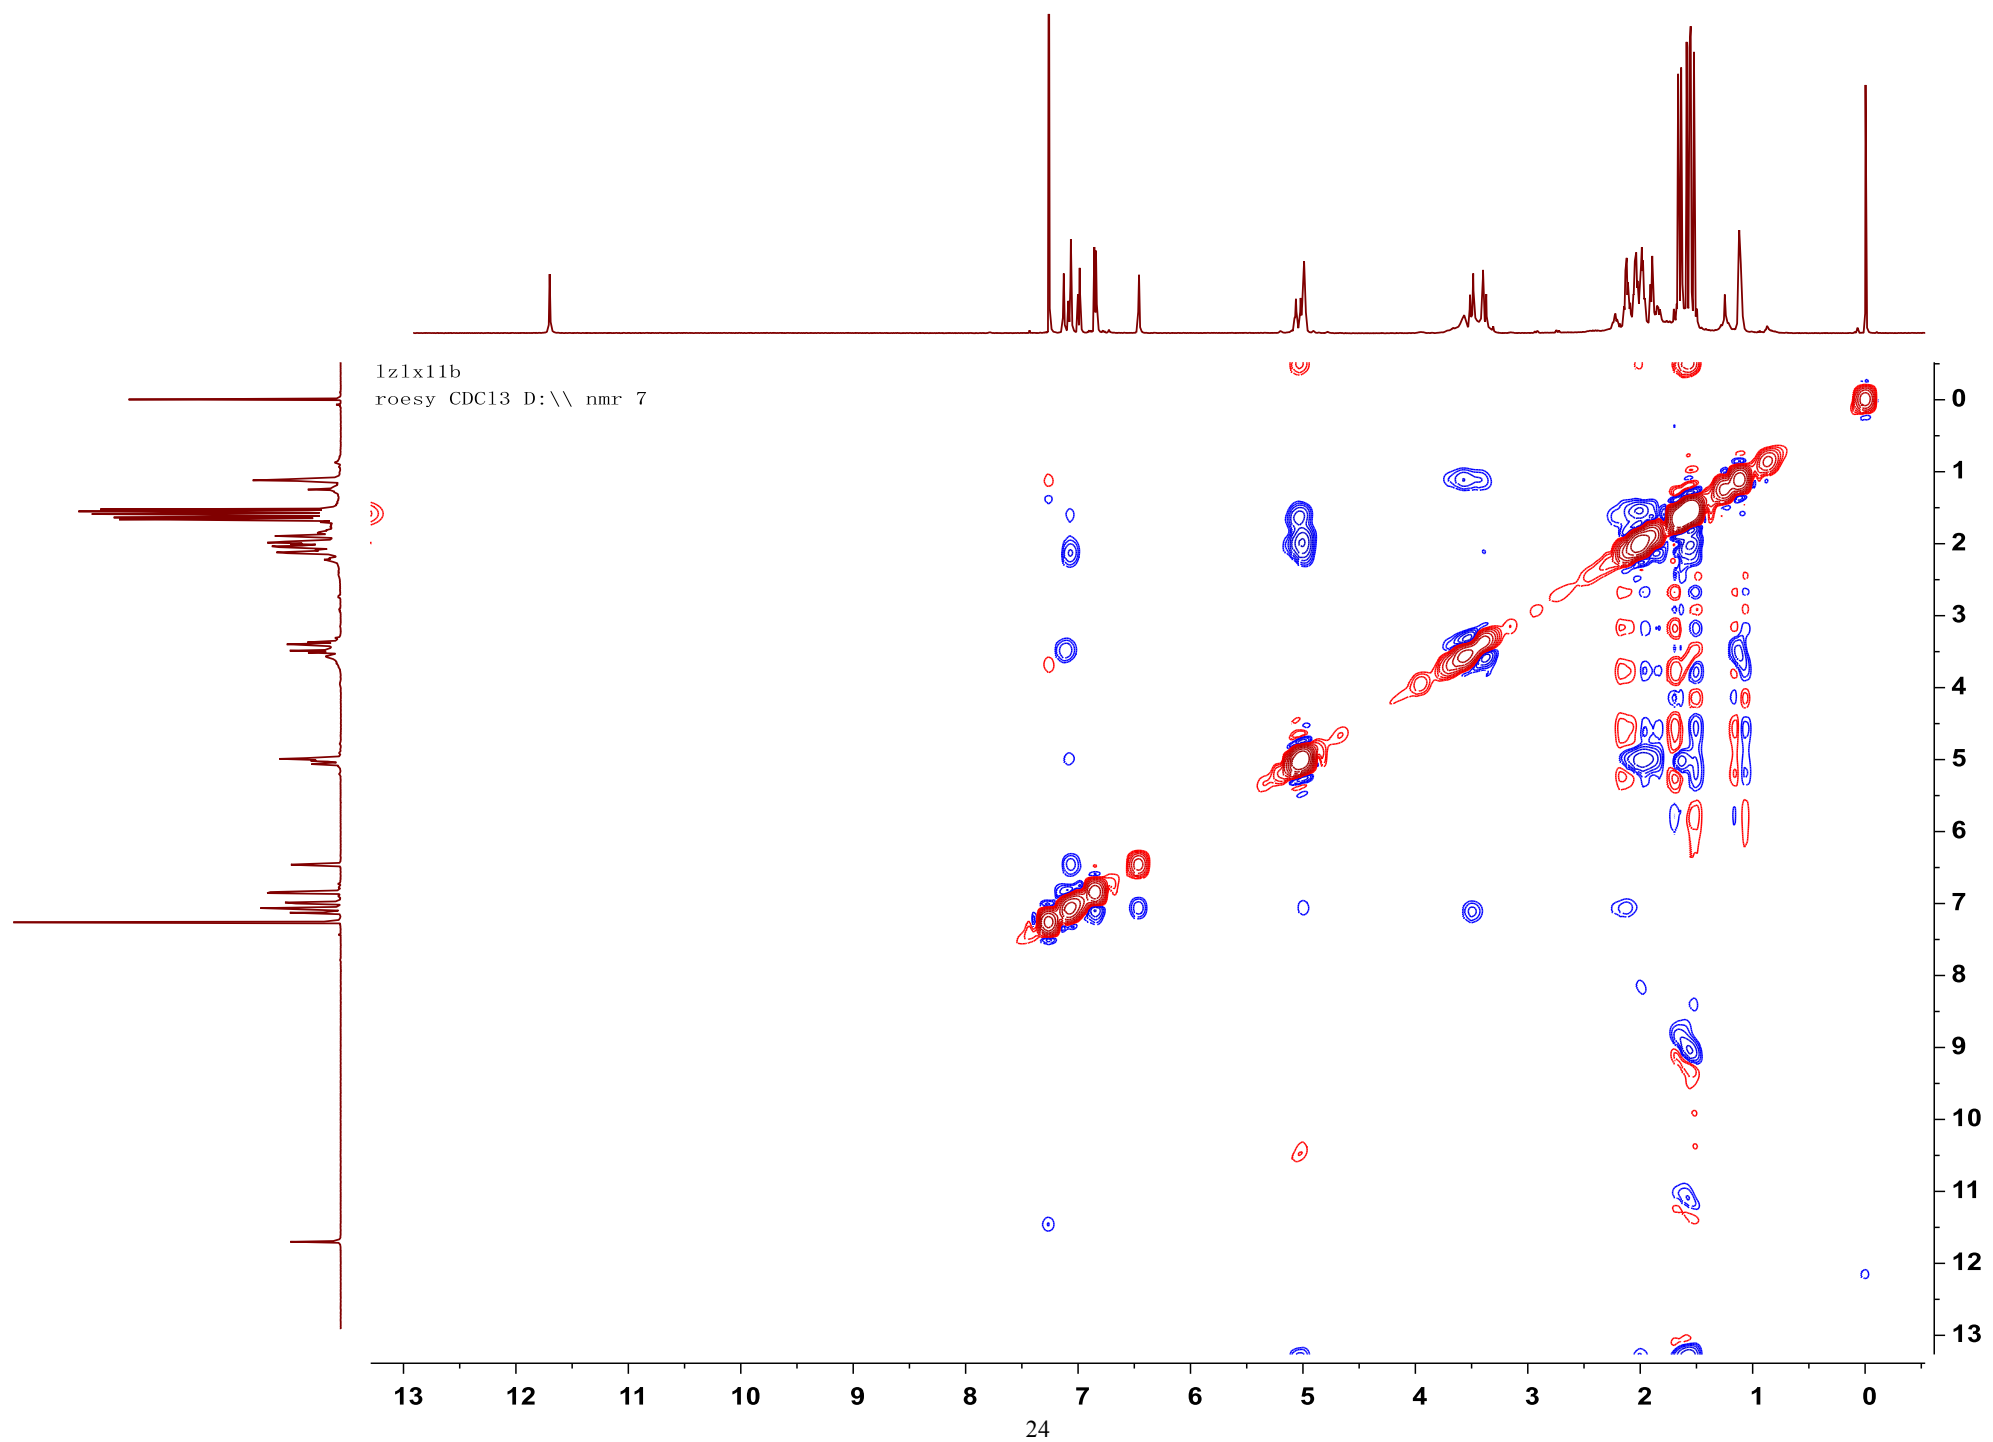



**Fig. 21S** Chiral phase HPLC chromatograph of **1**.

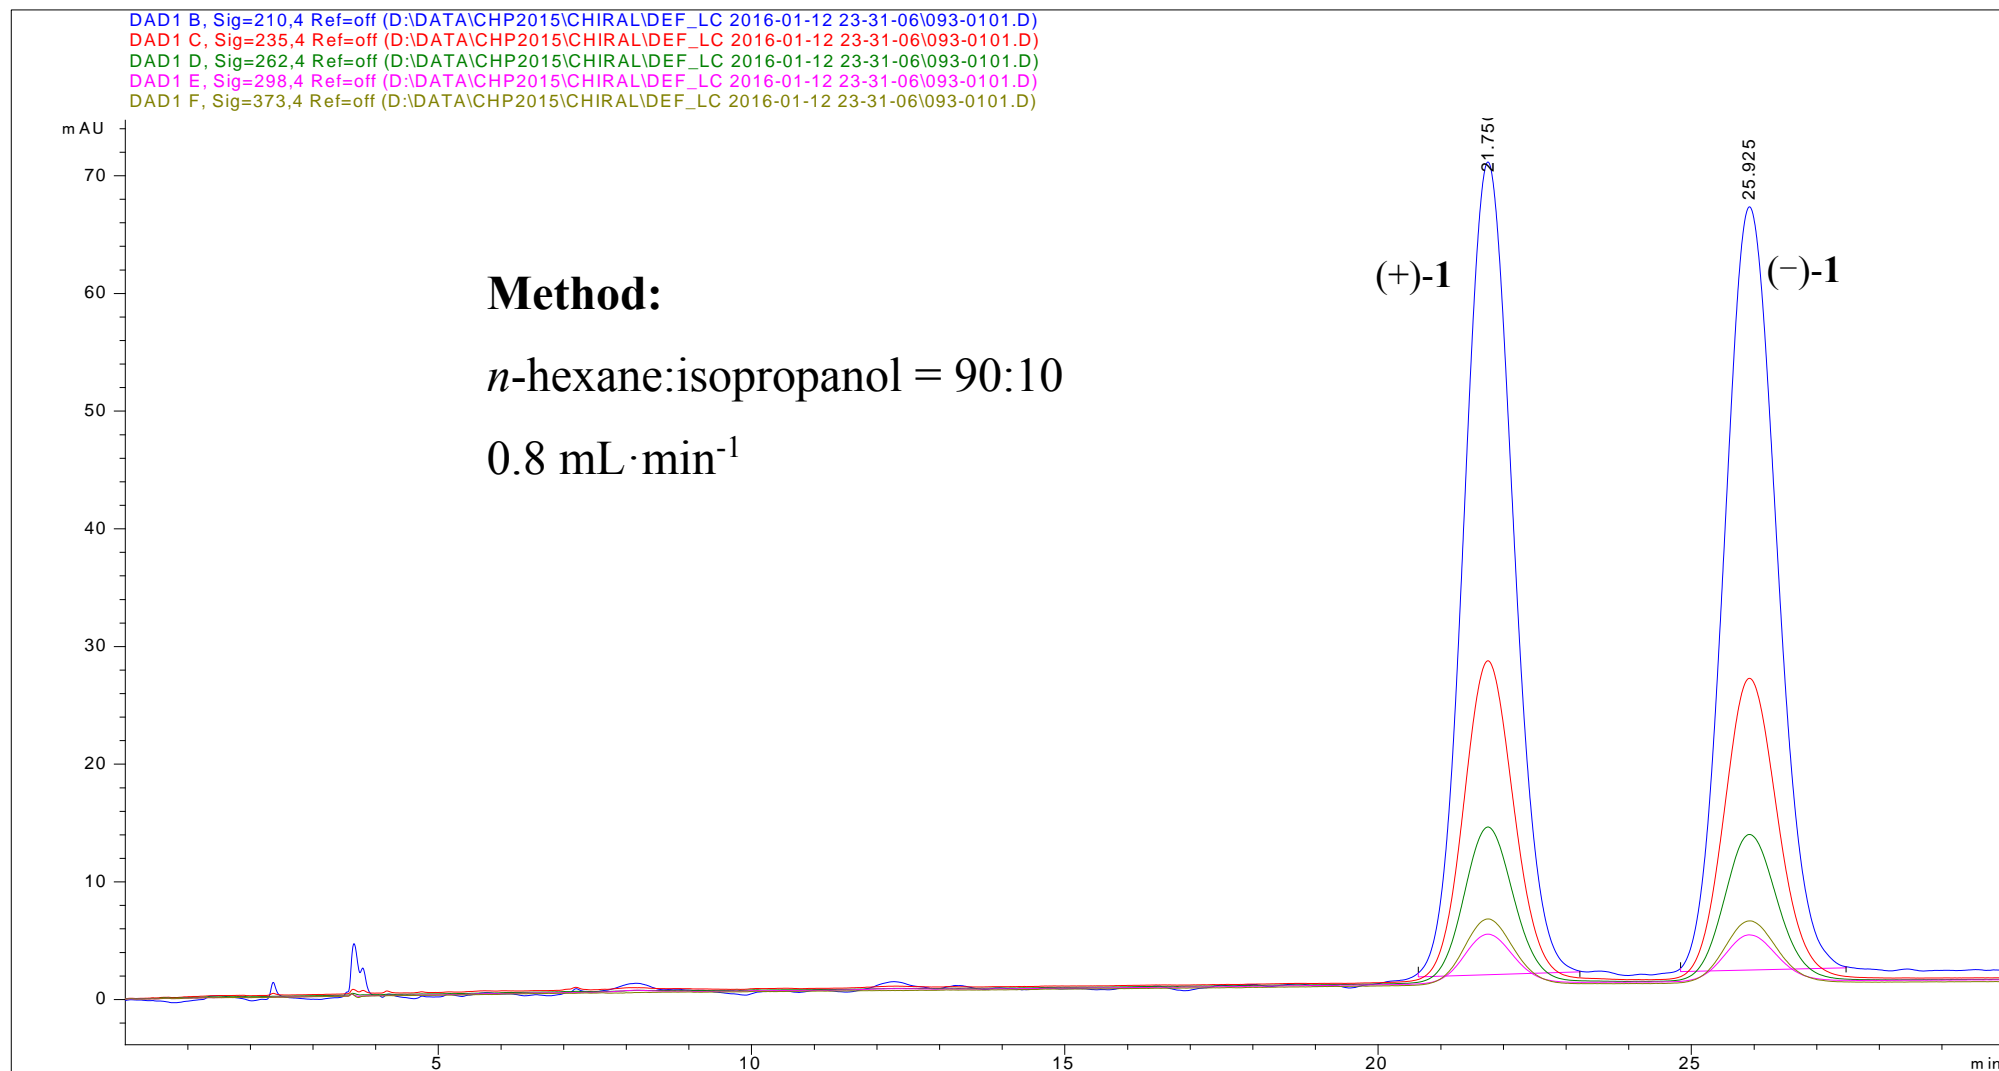

**Fig. 22S** The CD spectrum of ( $\pm$ )-1.

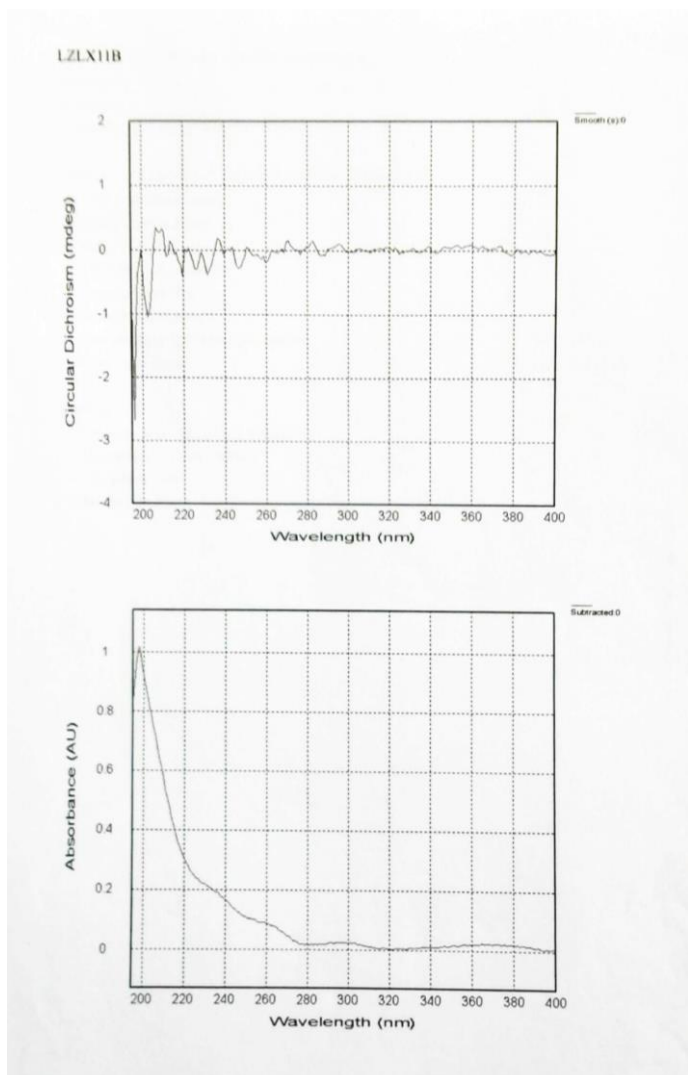

File: CD LZLX11B-1mm(195-400)16010802.dsx

ProBinaryX

Attributes :

- Time Stamp :Fri Jan 08 10:27:33 2016

- File ID : {D1D036F2-FCDD-4fbd-A8FC-8C2FF69929C2}

- Is CFR Compliant : false

- Original unaltered data

Remarks:

- HV (CDDC channel): 0 v

- Time per point: 1 s

- Description: Sample 1

- Concentration: 0.0735mg/mL MeOH

- Pathlength: 1 mm

Settings:

- Time-per-point: 1s (25us x 40000)

- Wavelength: 195nm - 400nm

- Step Size: 1nm

- Bandwidth: 2nm

**Fig. 23S** The CD spectrum of (+)-1.

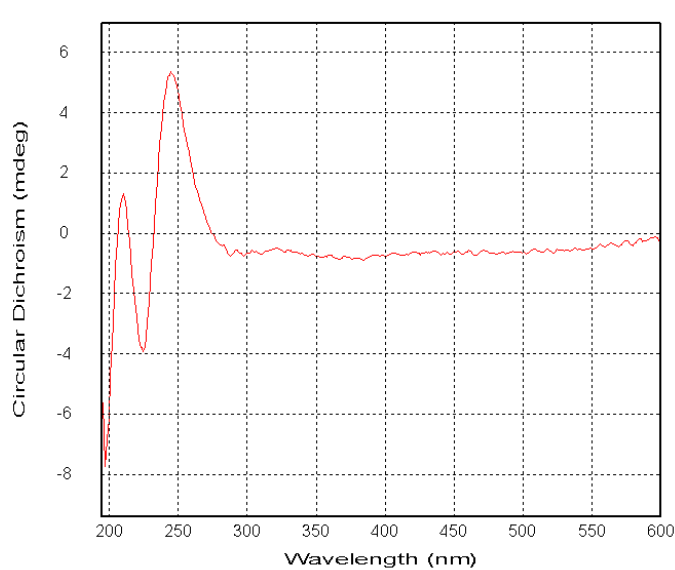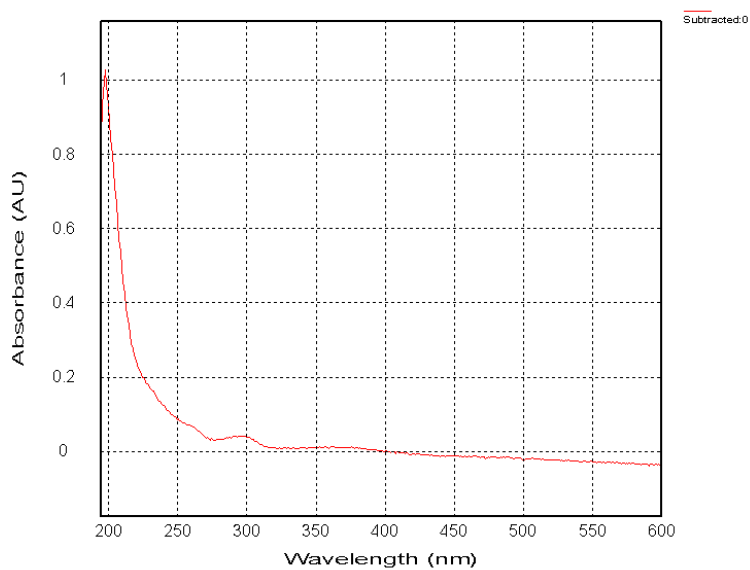

File: CD LZX11BA-1mm(195-600)16012106.dsx

ProBinaryX

Attributes :

- Time Stamp :Thu Jan 21 13:49:31 2016

- File ID : {0DDF03BC-F7A3-494c-9D71-45862DCDA25A}

- Is CFR Compliant : false

- Original unaltered data

Remarks:

- HV (CDDC channel): 0 v

- Time per point: 1 s

- Description: Sample 1

- Concentration: 0.0690mg/mL MeOH

- Pathlength: 1 mm

Settings:

- Time-per-point: 1s (25us x 40000)

- Wavelength: 195nm - 600nm

- Step Size: 1nm

- Bandwidth: 2nm

**Fig. 24S** The CD spectrum of (-)-1.

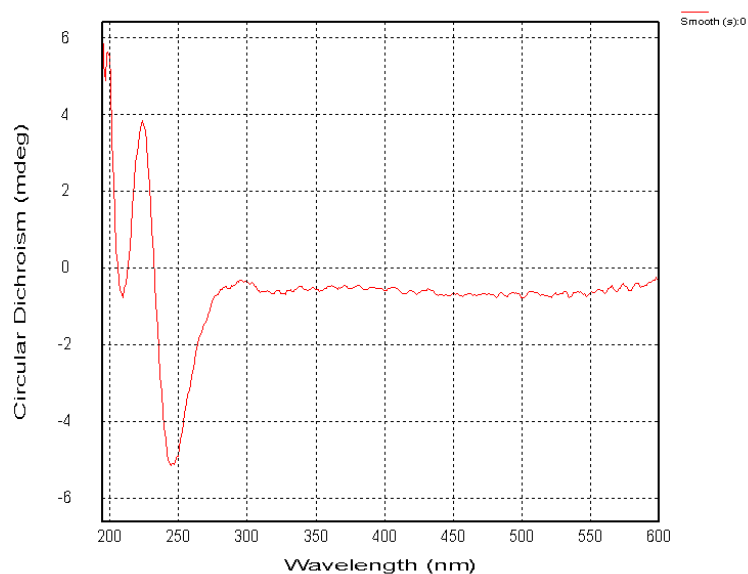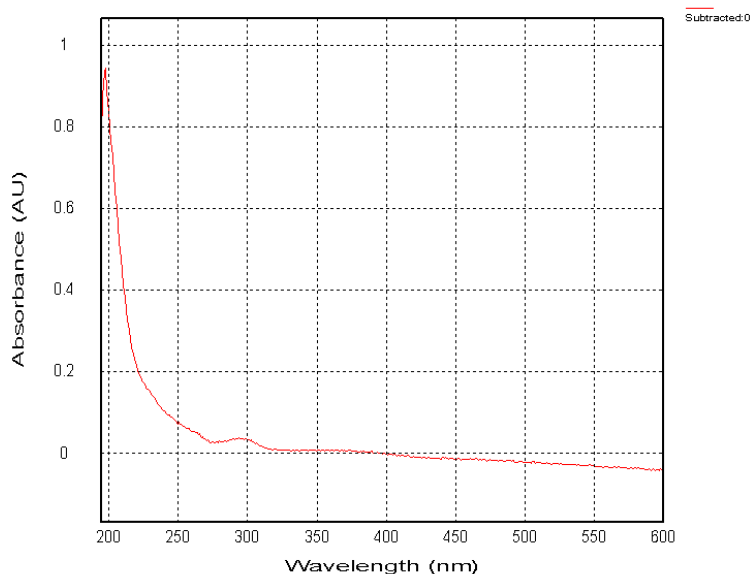

File: CD LZX11BB-1mm(195-600)16012107.dsx

ProBinaryX

Attributes :

- Time Stamp :Thu Jan 21 14:06:29 2016

- File ID : {E45E3C86-AD45-4b47-A08E-23C6DC4E696C}

- Is CFR Compliant : false

- Original unaltered data

Remarks:

- HV (CDDC channel): 0 v

- Time per point: 1 s

- Description: Sample 1

- Concentration: 0.0720mg/mL MeOH

- Pathlength: 1 mm

Settings:

- Time-per-point: 1s (25us x 40000)

- Wavelength: 195nm - 600nm

- Step Size: 1nm

- Bandwidth: 2nm

## Computational details of the simplified model compound **1a**.

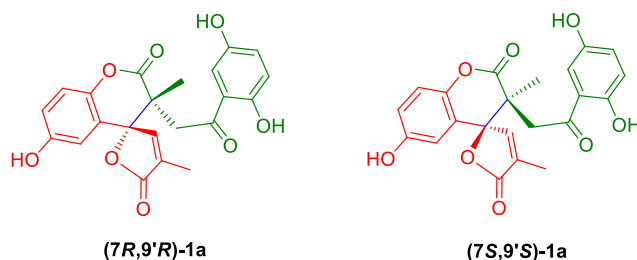

The CONFLEX searches based on molecular mechanics with MMFF94S force fields were performed for **(7R,9'R)-1a** and **(7S,9'S)-1a**, which gave 54 and 54 stable conformers, respectively.<sup>1,2</sup> Selected conformers (10 and 10) with distributions higher than 1% were further optimized by the density functional theory method at the B3LYP/6-31G\* level in Gaussian 09 program package,<sup>3</sup> leading to three minimum geometries, respectively, which were further checked by frequency calculation and resulted in no imaginary frequencies. The ECD were calculated using TD-DFT-B3LYP/6-31G (d,p) of theory on B3LYP/6-31G(d) optimized geometry through the IEFPCM model (in MeOH). The calculated ECD curves for **(7R,9'R)-1a** and **(7S,9'S)-1a**, and weighted ECD were all generated using SpecDis 1.60 with  $\sigma = 0.16$  eV, and UV shift 0 nm, respectively.<sup>4</sup>

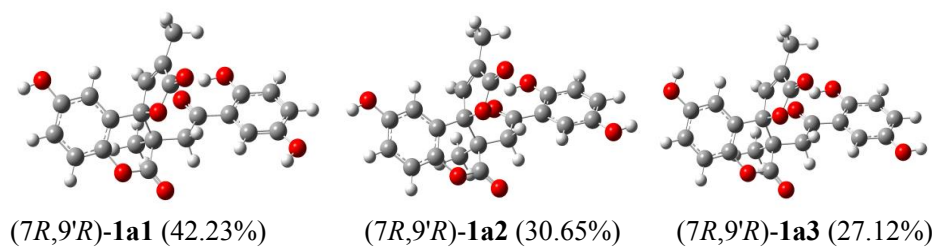

Three optimized conformers of **(7R,9'R)-1a** at B3LYP/6-31G(d) level.

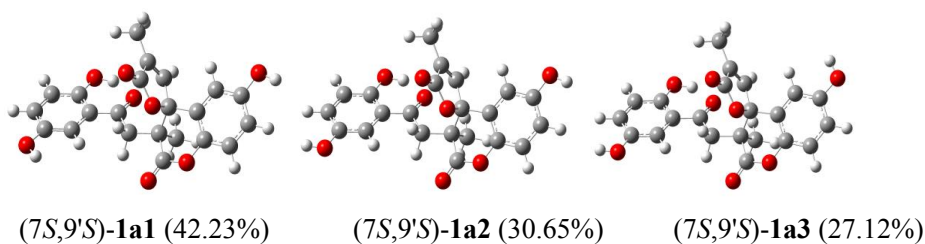

Three optimized conformers of **(7S,9'S)-1a** at B3LYP/6-31G(d) level.

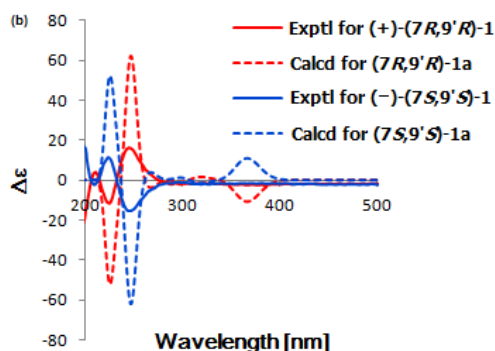

Experimental CD spectra of **1** and calculated ECD spectra of the model compounds **1a**.

**Table 3S** Standard orientation of (7*R*,9'*R*)-1a at B3LYP/6-31G(d,p) level.

| Standard orientation of (7 <i>R</i> ,9' <i>R</i> )-1a1 |                  |                |                         |           |           |
|--------------------------------------------------------|------------------|----------------|-------------------------|-----------|-----------|
| Center<br>Number                                       | Atomic<br>Number | Atomic<br>Type | Coordinates (Angstroms) |           |           |
|                                                        |                  |                | X                       | Y         | Z         |
| 1                                                      | 6                | 0              | -4.673471               | -1.616910 | -0.063233 |
| 2                                                      | 6                | 0              | -5.572608               | -0.587726 | -0.292351 |
| 3                                                      | 6                | 0              | -5.118233               | 0.714024  | -0.406079 |
| 4                                                      | 6                | 0              | -3.762627               | 0.987171  | -0.286346 |
| 5                                                      | 6                | 0              | -2.861112               | -0.035336 | -0.056092 |
| 6                                                      | 6                | 0              | -3.332273               | -1.332467 | 0.051269  |
| 7                                                      | 8                | 0              | -2.485973               | -2.383031 | 0.291694  |
| 8                                                      | 6                | 0              | -1.369105               | 0.169054  | 0.140713  |
| 9                                                      | 6                | 0              | -0.885210               | 1.546560  | -0.232897 |
| 10                                                     | 6                | 0              | -0.468267               | 2.192082  | 0.838622  |
| 11                                                     | 6                | 0              | -0.618601               | 1.274950  | 1.998306  |
| 12                                                     | 8                | 0              | -0.351087               | 1.466220  | 3.131896  |
| 13                                                     | 6                | 0              | 3.766358                | -0.907900 | 0.428709  |
| 14                                                     | 6                | 0              | 3.257431                | -0.046659 | -0.569214 |
| 15                                                     | 6                | 0              | 4.139527                | 0.823541  | -1.212528 |
| 16                                                     | 6                | 0              | 5.491922                | 0.823670  | -0.847927 |
| 17                                                     | 6                | 0              | 5.958873                | -0.017315 | 0.123174  |
| 18                                                     | 6                | 0              | 5.088537                | -0.898874 | 0.773170  |
| 19                                                     | 8                | 0              | 5.626250                | -1.705476 | 1.721432  |
| 20                                                     | 8                | 0              | 3.790311                | 1.682327  | -2.172487 |
| 21                                                     | 6                | 0              | 1.817839                | -0.055992 | -0.939751 |
| 22                                                     | 8                | 0              | 1.403747                | 0.665673  | -1.816352 |
| 23                                                     | 6                | 0              | 0.905715                | -1.016617 | -0.198864 |
| 24                                                     | 6                | 0              | -0.605473               | -1.019803 | -0.514131 |
| 25                                                     | 6                | 0              | -1.162455               | -2.309409 | 0.113593  |
| 26                                                     | 6                | 0              | -0.889115               | -1.141757 | -2.032585 |
| 27                                                     | 8                | 0              | -0.502011               | -3.251286 | 0.383680  |
| 28                                                     | 8                | 0              | -1.116426               | 0.110985  | 1.544804  |
| 29                                                     | 8                | 0              | -5.939854               | 1.762992  | -0.635073 |
| 30                                                     | 6                | 0              | 0.088256                | 3.570615  | 1.000896  |
| 31                                                     | 1                | 0              | -5.005845               | -2.633530 | 0.029115  |
| 32                                                     | 1                | 0              | -6.622432               | -0.807044 | -0.382893 |
| 33                                                     | 1                | 0              | -3.439997               | 2.006813  | -0.368630 |
| 34                                                     | 1                | 0              | -0.903141               | 1.909258  | -1.240027 |
| 35                                                     | 1                | 0              | 3.108144                | -1.591017 | 0.931540  |
| 36                                                     | 1                | 0              | 6.148819                | 1.504045  | -1.356009 |
| 37                                                     | 1                | 0              | 6.996351                | -0.016449 | 0.401699  |
| 38                                                     | 1                | 0              | 4.960576                | -2.244160 | 2.126037  |
| 39                                                     | 1                | 0              | 2.859400                | 1.589337  | -2.359928 |
| 40                                                     | 1                | 0              | 1.276537                | -2.013035 | -0.401868 |
| 41                                                     | 1                | 0              | 1.040646                | -0.874727 | 0.865338  |
| 42                                                     | 1                | 0              | -0.257752               | -1.917732 | -2.449885 |
| 43                                                     | 1                | 0              | -1.918070               | -1.413283 | -2.227718 |
| 44                                                     | 1                | 0              | -0.669617               | -0.221966 | -2.549218 |

|    |   |   |           |          |           |
|----|---|---|-----------|----------|-----------|
| 45 | 1 | 0 | -6.844409 | 1.484549 | -0.668305 |
| 46 | 1 | 0 | 0.134210  | 4.085330 | 0.049455  |
| 47 | 1 | 0 | -0.524975 | 4.148746 | 1.683375  |
| 48 | 1 | 0 | 1.086450  | 3.528216 | 1.422468  |

Standard orientation of (7*R*,9*R*)-**1a2**:

| Center<br>Number | Atomic<br>Number | Atomic<br>Type | Coordinates (Angstroms) |           |           |
|------------------|------------------|----------------|-------------------------|-----------|-----------|
|                  |                  |                | X                       | Y         | Z         |
| 1                | 6                | 0              | -4.675381               | -1.617626 | -0.054603 |
| 2                | 6                | 0              | -5.573300               | -0.588953 | -0.290470 |
| 3                | 6                | 0              | -5.117433               | 0.711542  | -0.411994 |
| 4                | 6                | 0              | -3.761704               | 0.983924  | -0.293054 |
| 5                | 6                | 0              | -2.861322               | -0.038135 | -0.055942 |
| 6                | 6                | 0              | -3.333782               | -1.334106 | 0.058930  |
| 7                | 8                | 0              | -2.489139               | -2.383930 | 0.305179  |
| 8                | 6                | 0              | -1.369311               | 0.165936  | 0.142309  |
| 9                | 6                | 0              | -0.885089               | 1.541384  | -0.238769 |
| 10               | 6                | 0              | -0.473448               | 2.194498  | 0.830085  |
| 11               | 6                | 0              | -0.629377               | 1.285612  | 1.995675  |
| 12               | 8                | 0              | -0.372586               | 1.488091  | 3.129685  |
| 13               | 6                | 0              | 3.768237                | -0.913085 | 0.417581  |
| 14               | 6                | 0              | 3.259689                | -0.051337 | -0.566539 |
| 15               | 6                | 0              | 4.138442                | 0.834223  | -1.207055 |
| 16               | 6                | 0              | 5.483092                | 0.838979  | -0.843773 |
| 17               | 6                | 0              | 5.956152                | -0.014351 | 0.124115  |
| 18               | 6                | 0              | 5.096282                | -0.902675 | 0.763262  |
| 19               | 8                | 0              | 5.512729                | -1.770270 | 1.720222  |
| 20               | 8                | 0              | 3.777703                | 1.698469  | -2.160380 |
| 21               | 6                | 0              | 1.815966                | -0.066475 | -0.934411 |
| 22               | 8                | 0              | 1.401810                | 0.651622  | -1.812938 |
| 23               | 6                | 0              | 0.906017                | -1.023916 | -0.187570 |
| 24               | 6                | 0              | -0.605273               | -1.026735 | -0.505079 |
| 25               | 6                | 0              | -1.165108               | -2.314692 | 0.123453  |
| 26               | 6                | 0              | -0.887282               | -1.154721 | -2.023643 |
| 27               | 8                | 0              | -0.507984               | -3.259614 | 0.388645  |
| 28               | 8                | 0              | -1.120227               | 0.116857  | 1.547223  |
| 29               | 8                | 0              | -5.938127               | 1.760001  | -0.648127 |
| 30               | 6                | 0              | 0.079868                | 3.575044  | 0.985809  |
| 31               | 1                | 0              | -5.008789               | -2.633345 | 0.043748  |
| 32               | 1                | 0              | -6.623344               | -0.807682 | -0.380228 |
| 33               | 1                | 0              | -3.437993               | 2.002735  | -0.381111 |
| 34               | 1                | 0              | -0.900169               | 1.897591  | -1.248248 |
| 35               | 1                | 0              | 3.132538                | -1.608829 | 0.927743  |
| 36               | 1                | 0              | 6.139356                | 1.526106  | -1.343450 |
| 37               | 1                | 0              | 7.000866                | 0.006840  | 0.385274  |
| 38               | 1                | 0              | 6.434628                | -1.656669 | 1.901985  |
| 39               | 1                | 0              | 2.848863                | 1.593699  | -2.350108 |
| 40               | 1                | 0              | 1.276850                | -2.021562 | -0.384316 |
| 41               | 1                | 0              | 1.042680                | -0.876986 | 0.875809  |

|    |   |   |           |           |           |
|----|---|---|-----------|-----------|-----------|
| 42 | 1 | 0 | -0.253240 | -1.930307 | -2.437504 |
| 43 | 1 | 0 | -1.915237 | -1.430510 | -2.218356 |
| 44 | 1 | 0 | -0.671133 | -0.236236 | -2.543993 |
| 45 | 1 | 0 | -6.842889 | 1.481980  | -0.678589 |
| 46 | 1 | 0 | 0.128220  | 4.084171  | 0.031434  |
| 47 | 1 | 0 | -0.536858 | 4.156048  | 1.662681  |
| 48 | 1 | 0 | 1.076621  | 3.537140  | 1.411262  |

Standard orientation of (7R,9R)-**1a3**:

| Center<br>Number | Atomic<br>Number | Atomic<br>Type | Coordinates (Angstroms) |           |           |
|------------------|------------------|----------------|-------------------------|-----------|-----------|
|                  |                  |                | X                       | Y         | Z         |
| 1                | 6                | 0              | -4.680774               | -1.628474 | -0.060967 |
| 2                | 6                | 0              | -5.580651               | -0.607543 | -0.279125 |
| 3                | 6                | 0              | -5.128616               | 0.701025  | -0.387350 |
| 4                | 6                | 0              | -3.777977               | 0.976208  | -0.275553 |
| 5                | 6                | 0              | -2.865412               | -0.049455 | -0.054761 |
| 6                | 6                | 0              | -3.332592               | -1.340411 | 0.050243  |
| 7                | 8                | 0              | -2.489569               | -2.393939 | 0.286114  |
| 8                | 6                | 0              | -1.373291               | 0.162583  | 0.135702  |
| 9                | 6                | 0              | -0.894515               | 1.535868  | -0.261123 |
| 10               | 6                | 0              | -0.479790               | 2.201179  | 0.799026  |
| 11               | 6                | 0              | -0.628440               | 1.303464  | 1.974608  |
| 12               | 8                | 0              | -0.368413               | 1.520231  | 3.105245  |
| 13               | 6                | 0              | 3.766285                | -0.915802 | 0.426221  |
| 14               | 6                | 0              | 3.260200                | -0.053027 | -0.558388 |
| 15               | 6                | 0              | 4.140708                | 0.832763  | -1.196155 |
| 16               | 6                | 0              | 5.484518                | 0.836905  | -0.829819 |
| 17               | 6                | 0              | 5.955068                | -0.017242 | 0.138538  |
| 18               | 6                | 0              | 5.093492                | -0.905943 | 0.775008  |
| 19               | 8                | 0              | 5.507301                | -1.774056 | 1.732433  |
| 20               | 8                | 0              | 3.782214                | 1.698066  | -2.149502 |
| 21               | 6                | 0              | 1.817397                | -0.067309 | -0.929338 |
| 22               | 8                | 0              | 1.405230                | 0.652068  | -1.807977 |
| 23               | 6                | 0              | 0.905574                | -1.024936 | -0.184932 |
| 24               | 6                | 0              | -0.604904               | -1.030290 | -0.506849 |
| 25               | 6                | 0              | -1.164388               | -2.319681 | 0.118549  |
| 26               | 6                | 0              | -0.881383               | -1.160739 | -2.026387 |
| 27               | 8                | 0              | -0.505561               | -3.261661 | 0.389659  |
| 28               | 8                | 0              | -1.117369               | 0.129405  | 1.540231  |
| 29               | 8                | 0              | -6.053669               | 1.662733  | -0.605280 |
| 30               | 6                | 0              | 0.076554                | 3.582404  | 0.937845  |
| 31               | 1                | 0              | -5.006774               | -2.647355 | 0.029757  |
| 32               | 1                | 0              | -6.632095               | -0.805647 | -0.367033 |
| 33               | 1                | 0              | -3.434925               | 1.992231  | -0.352327 |
| 34               | 1                | 0              | -0.911275               | 1.880309  | -1.274745 |
| 35               | 1                | 0              | 3.129341                | -1.611950 | 0.934266  |
| 36               | 1                | 0              | 6.142161                | 1.524125  | -1.327546 |
| 37               | 1                | 0              | 6.999157                | 0.003500  | 0.402160  |
| 38               | 1                | 0              | 6.429771                | -1.664041 | 1.913556  |



|    |   |   |           |           |           |
|----|---|---|-----------|-----------|-----------|
| 39 | 1 | 0 | 2.854203  | 1.592226  | -2.342437 |
| 40 | 1 | 0 | 1.277790  | -2.022313 | -0.380178 |
| 41 | 1 | 0 | 1.039220  | -0.877777 | 0.878786  |
| 42 | 1 | 0 | -0.249116 | -1.940473 | -2.435167 |
| 43 | 1 | 0 | -1.909688 | -1.432253 | -2.224633 |
| 44 | 1 | 0 | -0.658000 | -0.245066 | -2.548592 |
| 45 | 1 | 0 | -5.656451 | 2.522276  | -0.612410 |
| 46 | 1 | 0 | 0.115899  | 4.084211  | -0.020906 |
| 47 | 1 | 0 | -0.530827 | 4.169786  | 1.617752  |
| 48 | 1 | 0 | 1.077927  | 3.546169  | 1.352365  |

**Table 4S** Standard orientation of (7*S*,9'*S*)-1a at B3LYP/6-31G(d,p) level.

| Standard orientation of (7 <i>S</i> ,9' <i>S</i> )-1a1 |                  |                |                         |           |           |
|--------------------------------------------------------|------------------|----------------|-------------------------|-----------|-----------|
| Center<br>Number                                       | Atomic<br>Number | Atomic<br>Type | Coordinates (Angstroms) |           |           |
|                                                        |                  |                | X                       | Y         | Z         |
| 1                                                      | 6                | 0              | 4.673471                | -1.616910 | -0.063233 |
| 2                                                      | 6                | 0              | 5.572608                | -0.587726 | -0.292351 |
| 3                                                      | 6                | 0              | 5.118233                | 0.714024  | -0.406079 |
| 4                                                      | 6                | 0              | 3.762627                | 0.987171  | -0.286346 |
| 5                                                      | 6                | 0              | 2.861112                | -0.035336 | -0.056092 |
| 6                                                      | 6                | 0              | 3.332273                | -1.332467 | 0.051269  |
| 7                                                      | 8                | 0              | 2.485973                | -2.383031 | 0.291694  |
| 8                                                      | 6                | 0              | 1.369105                | 0.169054  | 0.140713  |
| 9                                                      | 6                | 0              | 0.885210                | 1.546560  | -0.232897 |
| 10                                                     | 6                | 0              | 0.468267                | 2.192082  | 0.838622  |
| 11                                                     | 6                | 0              | 0.618601                | 1.274950  | 1.998306  |
| 12                                                     | 8                | 0              | 0.351087                | 1.466220  | 3.131896  |
| 13                                                     | 6                | 0              | -3.766358               | -0.907900 | 0.428709  |
| 14                                                     | 6                | 0              | -3.257431               | -0.046659 | -0.569214 |
| 15                                                     | 6                | 0              | -4.139527               | 0.823541  | -1.212528 |
| 16                                                     | 6                | 0              | -5.491922               | 0.823670  | -0.847927 |
| 17                                                     | 6                | 0              | -5.958873               | -0.017315 | 0.123174  |
| 18                                                     | 6                | 0              | -5.088537               | -0.898874 | 0.773170  |
| 19                                                     | 8                | 0              | -5.626250               | -1.705476 | 1.721432  |
| 20                                                     | 8                | 0              | -3.790311               | 1.682327  | -2.172487 |
| 21                                                     | 6                | 0              | -1.817839               | -0.055992 | -0.939751 |
| 22                                                     | 8                | 0              | -1.403747               | 0.665673  | -1.816352 |
| 23                                                     | 6                | 0              | -0.905715               | -1.016617 | -0.198864 |
| 24                                                     | 6                | 0              | 0.605473                | -1.019803 | -0.514131 |
| 25                                                     | 6                | 0              | 1.162455                | -2.309409 | 0.113593  |
| 26                                                     | 6                | 0              | 0.889115                | -1.141757 | -2.032585 |
| 27                                                     | 8                | 0              | 0.502011                | -3.251286 | 0.383680  |
| 28                                                     | 8                | 0              | 1.116426                | 0.110985  | 1.544804  |
| 29                                                     | 8                | 0              | 5.939854                | 1.762992  | -0.635073 |
| 30                                                     | 6                | 0              | -0.088256               | 3.570615  | 1.000896  |
| 31                                                     | 1                | 0              | 5.005845                | -2.633530 | 0.029115  |
| 32                                                     | 1                | 0              | 6.622432                | -0.807044 | -0.382893 |
| 33                                                     | 1                | 0              | 3.439997                | 2.006813  | -0.368630 |

|    |   |   |           |           |           |
|----|---|---|-----------|-----------|-----------|
| 34 | 1 | 0 | 0.903141  | 1.909258  | -1.240027 |
| 35 | 1 | 0 | -3.108144 | -1.591017 | 0.931540  |
| 36 | 1 | 0 | -6.148819 | 1.504045  | -1.356009 |
| 37 | 1 | 0 | -6.996351 | -0.016449 | 0.401699  |
| 38 | 1 | 0 | -4.960576 | -2.244160 | 2.126037  |
| 39 | 1 | 0 | -2.859400 | 1.589337  | -2.359928 |
| 40 | 1 | 0 | -1.040646 | -0.874727 | 0.865338  |
| 41 | 1 | 0 | -1.276537 | -2.013035 | -0.401868 |
| 42 | 1 | 0 | 0.257752  | -1.917732 | -2.449885 |
| 43 | 1 | 0 | 0.669617  | -0.221966 | -2.549218 |
| 44 | 1 | 0 | 1.918070  | -1.413283 | -2.227718 |
| 45 | 1 | 0 | 6.844409  | 1.484549  | -0.668305 |
| 46 | 1 | 0 | -0.134210 | 4.085330  | 0.049455  |
| 47 | 1 | 0 | -1.086450 | 3.528216  | 1.422468  |
| 48 | 1 | 0 | 0.524975  | 4.148746  | 1.683375  |

Standard orientation of (7*S*,9'*S*)-**1a2**

| Center<br>Number | Atomic<br>Number | Atomic<br>Type | Coordinates (Angstroms) |           |           |
|------------------|------------------|----------------|-------------------------|-----------|-----------|
|                  |                  |                | X                       | Y         | Z         |
| 1                | 6                | 0              | 4.675381                | -1.617626 | -0.054603 |
| 2                | 6                | 0              | 5.573300                | -0.588953 | -0.290470 |
| 3                | 6                | 0              | 5.117433                | 0.711542  | -0.411994 |
| 4                | 6                | 0              | 3.761704                | 0.983924  | -0.293054 |
| 5                | 6                | 0              | 2.861322                | -0.038135 | -0.055942 |
| 6                | 6                | 0              | 3.333782                | -1.334106 | 0.058930  |
| 7                | 8                | 0              | 2.489139                | -2.383930 | 0.305179  |
| 8                | 6                | 0              | 1.369311                | 0.165936  | 0.142309  |
| 9                | 6                | 0              | 0.885089                | 1.541384  | -0.238769 |
| 10               | 6                | 0              | 0.473448                | 2.194498  | 0.830085  |
| 11               | 6                | 0              | 0.629377                | 1.285612  | 1.995675  |
| 12               | 8                | 0              | 0.372586                | 1.488091  | 3.129685  |
| 13               | 6                | 0              | -3.768237               | -0.913085 | 0.417581  |
| 14               | 6                | 0              | -3.259689               | -0.051337 | -0.566539 |
| 15               | 6                | 0              | -4.138442               | 0.834223  | -1.207055 |
| 16               | 6                | 0              | -5.483092               | 0.838979  | -0.843773 |
| 17               | 6                | 0              | -5.956152               | -0.014351 | 0.124115  |
| 18               | 6                | 0              | -5.096282               | -0.902675 | 0.763262  |
| 19               | 8                | 0              | -5.512729               | -1.770270 | 1.720222  |
| 20               | 8                | 0              | -3.777703               | 1.698469  | -2.160380 |
| 21               | 6                | 0              | -1.815966               | -0.066475 | -0.934411 |
| 22               | 8                | 0              | -1.401810               | 0.651622  | -1.812938 |
| 23               | 6                | 0              | -0.906017               | -1.023916 | -0.187570 |
| 24               | 6                | 0              | 0.605273                | -1.026735 | -0.505079 |
| 25               | 6                | 0              | 1.165108                | -2.314692 | 0.123453  |
| 26               | 6                | 0              | 0.887282                | -1.154721 | -2.023643 |
| 27               | 8                | 0              | 0.507984                | -3.259614 | 0.388645  |
| 28               | 8                | 0              | 1.120227                | 0.116857  | 1.547223  |
| 29               | 8                | 0              | 5.938127                | 1.760001  | -0.648127 |
| 30               | 6                | 0              | -0.079868               | 3.575044  | 0.985809  |

|    |   |   |           |           |           |
|----|---|---|-----------|-----------|-----------|
| 31 | 1 | 0 | 5.008789  | -2.633345 | 0.043748  |
| 32 | 1 | 0 | 6.623344  | -0.807682 | -0.380228 |
| 33 | 1 | 0 | 3.437993  | 2.002735  | -0.381111 |
| 34 | 1 | 0 | 0.900169  | 1.897591  | -1.248248 |
| 35 | 1 | 0 | -3.132538 | -1.608829 | 0.927743  |
| 36 | 1 | 0 | -6.139356 | 1.526106  | -1.343450 |
| 37 | 1 | 0 | -7.000866 | 0.006840  | 0.385274  |
| 38 | 1 | 0 | -6.434628 | -1.656669 | 1.901985  |
| 39 | 1 | 0 | -2.848863 | 1.593699  | -2.350108 |
| 40 | 1 | 0 | -1.042680 | -0.876986 | 0.875809  |
| 41 | 1 | 0 | -1.276850 | -2.021562 | -0.384316 |
| 42 | 1 | 0 | 0.253240  | -1.930307 | -2.437504 |
| 43 | 1 | 0 | 0.671133  | -0.236236 | -2.543993 |
| 44 | 1 | 0 | 1.915237  | -1.430510 | -2.218356 |
| 45 | 1 | 0 | 6.842889  | 1.481980  | -0.678589 |
| 46 | 1 | 0 | -0.128220 | 4.084171  | 0.031434  |
| 47 | 1 | 0 | -1.076621 | 3.537140  | 1.411262  |
| 48 | 1 | 0 | 0.536858  | 4.156048  | 1.662681  |

Standard orientation of (7*S*,9'*S*)-**1a3**:

| Center<br>Number | Atomic<br>Number | Atomic<br>Type | Coordinates (Angstroms) |           |           |
|------------------|------------------|----------------|-------------------------|-----------|-----------|
|                  |                  |                | X                       | Y         | Z         |
| 1                | 6                | 0              | 4.715389                | -1.643636 | -0.062703 |
| 2                | 6                | 0              | 5.619245                | -0.607517 | -0.267577 |
| 3                | 6                | 0              | 5.156354                | 0.708480  | -0.367268 |
| 4                | 6                | 0              | 3.789328                | 0.976755  | -0.263032 |
| 5                | 6                | 0              | 2.874010                | -0.059523 | -0.058387 |
| 6                | 6                | 0              | 3.355449                | -1.363682 | 0.041371  |
| 7                | 8                | 0              | 2.515185                | -2.443421 | 0.277582  |
| 8                | 6                | 0              | 1.382631                | 0.158504  | 0.127290  |
| 9                | 6                | 0              | 0.902461                | 1.519325  | -0.299992 |
| 10               | 6                | 0              | 0.477505                | 2.223463  | 0.754834  |
| 11               | 6                | 0              | 0.619701                | 1.370922  | 1.961555  |
| 12               | 8                | 0              | 0.352970                | 1.625185  | 3.109281  |
| 13               | 6                | 0              | -3.779760               | -0.906946 | 0.470912  |
| 14               | 6                | 0              | -3.261802               | -0.078385 | -0.548948 |
| 15               | 6                | 0              | -4.149144               | 0.800419  | -1.232872 |
| 16               | 6                | 0              | -5.504666               | 0.823877  | -0.874597 |
| 17               | 6                | 0              | -5.985923               | -0.000050 | 0.130330  |
| 18               | 6                | 0              | -5.123097               | -0.874599 | 0.810708  |
| 19               | 8                | 0              | -5.550328               | -1.711831 | 1.809888  |
| 20               | 8                | 0              | -3.751975               | 1.623829  | -2.221148 |
| 21               | 6                | 0              | -1.836239               | -0.096040 | -0.915289 |
| 22               | 8                | 0              | -1.406475               | 0.657360  | -1.808990 |
| 23               | 6                | 0              | -0.909628               | -1.028391 | -0.155519 |
| 24               | 6                | 0              | 0.599439                | -1.049944 | -0.494095 |
| 25               | 6                | 0              | 1.158587                | -2.347844 | 0.127144  |
| 26               | 6                | 0              | 0.856930                | -1.180394 | -2.020093 |
| 27               | 8                | 0              | 0.489906                | -3.310618 | 0.407722  |

|    |   |   |           |           |           |
|----|---|---|-----------|-----------|-----------|
| 28 | 8 | 0 | 1.128730  | 0.149047  | 1.568552  |
| 29 | 8 | 0 | 6.088584  | 1.689885  | -0.570150 |
| 30 | 6 | 0 | -0.082836 | 3.603928  | 0.849909  |
| 31 | 1 | 0 | 5.048678  | -2.672162 | 0.022714  |
| 32 | 1 | 0 | 6.683284  | -0.799947 | -0.351262 |
| 33 | 1 | 0 | 3.431641  | 2.000864  | -0.332192 |
| 34 | 1 | 0 | 0.921009  | 1.842433  | -1.332356 |
| 35 | 1 | 0 | -3.138687 | -1.589830 | 1.014964  |
| 36 | 1 | 0 | -6.162265 | 1.501865  | -1.407725 |
| 37 | 1 | 0 | -7.041843 | 0.031879  | 0.392623  |
| 38 | 1 | 0 | -6.500083 | -1.579094 | 1.954300  |
| 39 | 1 | 0 | -2.782387 | 1.458053  | -2.339488 |
| 40 | 1 | 0 | -1.025430 | -0.840848 | 0.917453  |
| 41 | 1 | 0 | -1.282142 | -2.048867 | -0.293923 |
| 42 | 1 | 0 | 0.316619  | -2.053056 | -2.400930 |
| 43 | 1 | 0 | 0.490441  | -0.301690 | -2.548798 |
| 44 | 1 | 0 | 1.918164  | -1.318733 | -2.239356 |
| 45 | 1 | 0 | 5.646258  | 2.553129  | -0.591818 |
| 46 | 1 | 0 | -0.119360 | 4.092135  | -0.127164 |
| 47 | 1 | 0 | -1.096371 | 3.578012  | 1.266665  |
| 48 | 1 | 0 | 0.516095  | 4.218021  | 1.532331  |

## References:

- (1) Goto, H.; Osawa, E.; *J. Am. Chem. Soc.* **1989**, *111*, 8950–8951.
- (2) Goto, H.; Osawa, E.; *J. Chem. Soc., Perkin Trans. 2*, **1993**, 187–198.
- (3) Frisch, M. J.; Trucks, G. W.; Schlegel, H. B.; Scuseria, G. E.; Robb, M. A.; Cheeseman, J. R.; Scalmani, G.; Barone, V.; Mennucci, B.; Petersson, G. A.; Nakatsuji, H.; Caricato, M.; Li, X.; Hratchian, H. P.; Izmaylov, A. F.; Bloino, J.; Zheng, G.; Sonnenberg, J. L.; Hada, M.; Ehara, M.; Toyota, K.; Fukuda, R.; Hasegawa, J.; Ishida, M.; Nakajima, T.; Honda, Y.; Kitao, O.; Nakai, H.; Vreven, T.; Montgomery, J. A.; Jr., Peralta, J. E.; Ogliaro, F.; Bearpark, M.; Heyd, J. J.; Brothers, E.; Kudin, K. N.; Staroverov, V. N.; Keith, T.; Kobayashi, R.; Normand, J.; Raghavachari, K.; Rendell, A.; Burant, J. C.; Iyengar, S. S.; Tomasi, J.; Cossi, M.; Rega, N.; Millam, J. M.; Klene, M.; Knox, J. E.; Cross, J. B.; Bakken, V.; Adamo, C.; Jaramillo, J.; Gomperts, R.; Stratmann, R. E.; Yazyev, O.; Austin, A. J.; Cammi, R.; Pomelli, C.; Ochterski, J. W.; Martin, R. L.; Morokuma, K.; Zakrzewski, V. G.; Voth, G. A.; Salvador, P.; Dannenberg, J. J.; Dapprich, S.; Daniels, A. D.; Farkas, O.; Foresman, J. B.; Ortiz, J. V.; Cioslowski, J.; and Fox, D. J.; *Gaussian 09*, Revision B.01, Gaussian, Inc., Wallingford CT, 2010.
- (4) Bruhn, T.; Schaumlöffel, A.; Hemberger, Y.; Bringmann, G. *Spec Dis*, version 1.60, University of Würzburg, Germany, 2012.

Fig. 25S ESIMS (-) report of 1.

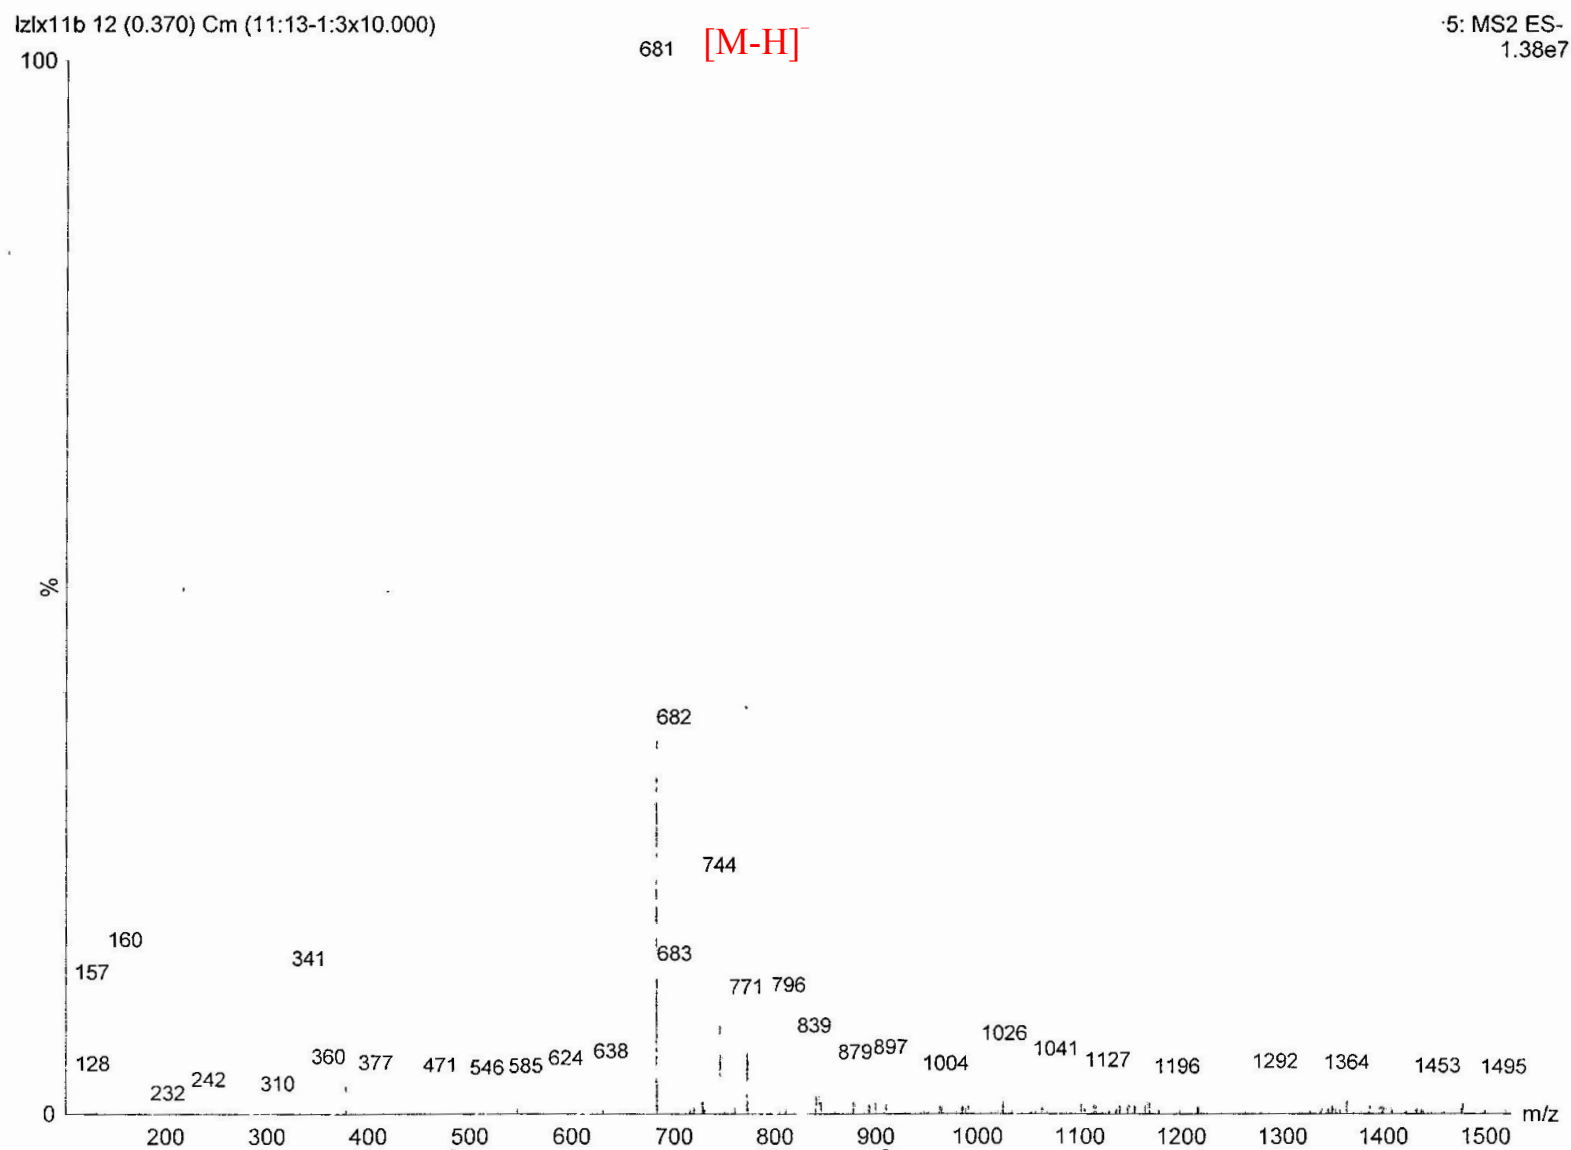

Fig. 26S HRESIMS (–) report of 1.

## Qualitative Analysis Report

|                               |                      |                      |                       |
|-------------------------------|----------------------|----------------------|-----------------------|
| <b>Data Filename</b>          | 151221ESINA1.d       | <b>Sample Name</b>   | lzlxl1b               |
| <b>Sample Type</b>            | Sample               | <b>Position</b>      |                       |
| <b>Instrument Name</b>        | Agilent G6230 TOF MS | <b>User Name</b>     | KIB                   |
| <b>Acq Method</b>             | ESIN.m               | <b>Acquired Time</b> | 12/21/2015 9:31:18 AM |
| <b>IRM Calibration Status</b> | Success              | <b>DA Method</b>     | ESI.m                 |
| <b>Comment</b>                |                      |                      |                       |

**Sample Group** Info.  
**Acquisition SW** 6200 series TOF/6500 series  
**Version** Q-TOF B.05.01 (B5125.2)

### User Spectra

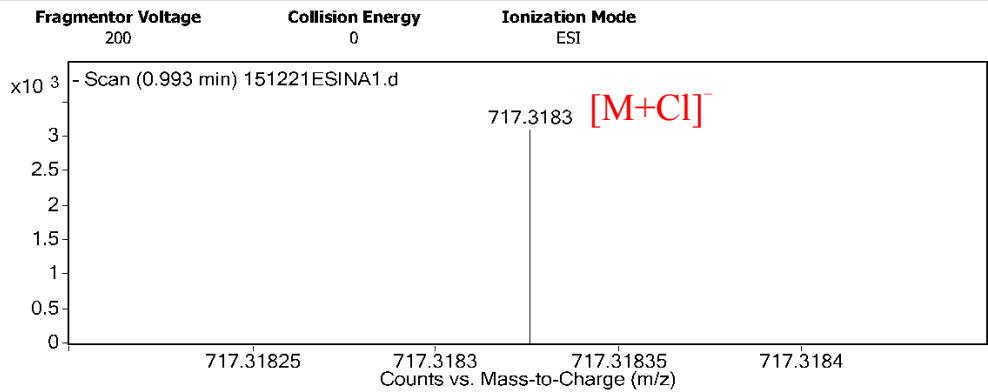

### Peak List

| m/z       | z | Abund    | Formula       | Ion |
|-----------|---|----------|---------------|-----|
| 112.9856  |   | 2562.6   |               |     |
| 717.3183  | 1 | 3088.09  | C42 H50 Cl O8 | M-  |
| 718.3214  | 1 | 983.84   | C42 H50 Cl O8 | M-  |
| 733.3116  | 1 | 1256.88  |               |     |
| 744.3381  | 1 | 2690.58  |               |     |
| 745.3394  | 1 | 862.47   |               |     |
| 1033.9881 | 1 | 95864.88 |               |     |
| 1034.9896 | 1 | 12841.06 |               |     |
| 1933.927  | 1 | 16671.82 |               |     |
| 1934.9301 | 1 | 3335.57  |               |     |

### Formula Calculator Element Limits

| Element | Min | Max |
|---------|-----|-----|
| C       | 0   | 200 |
| H       | 0   | 400 |
| O       | 0   | 13  |
| Cl      | 1   | 1   |

### Formula Calculator Results

| Formula       | CalculatedMass | CalculatedMz | Mz       | Diff. (mDa) | Diff. (ppm) | DBE     |
|---------------|----------------|--------------|----------|-------------|-------------|---------|
| C42 H50 Cl O8 | 717.3194       | 717.3200     | 717.3183 | 1.8         | 2.5         | 17.5000 |

[M+Cl]

--- End Of Report ---

Fig. 27S IR spectrum of 1.

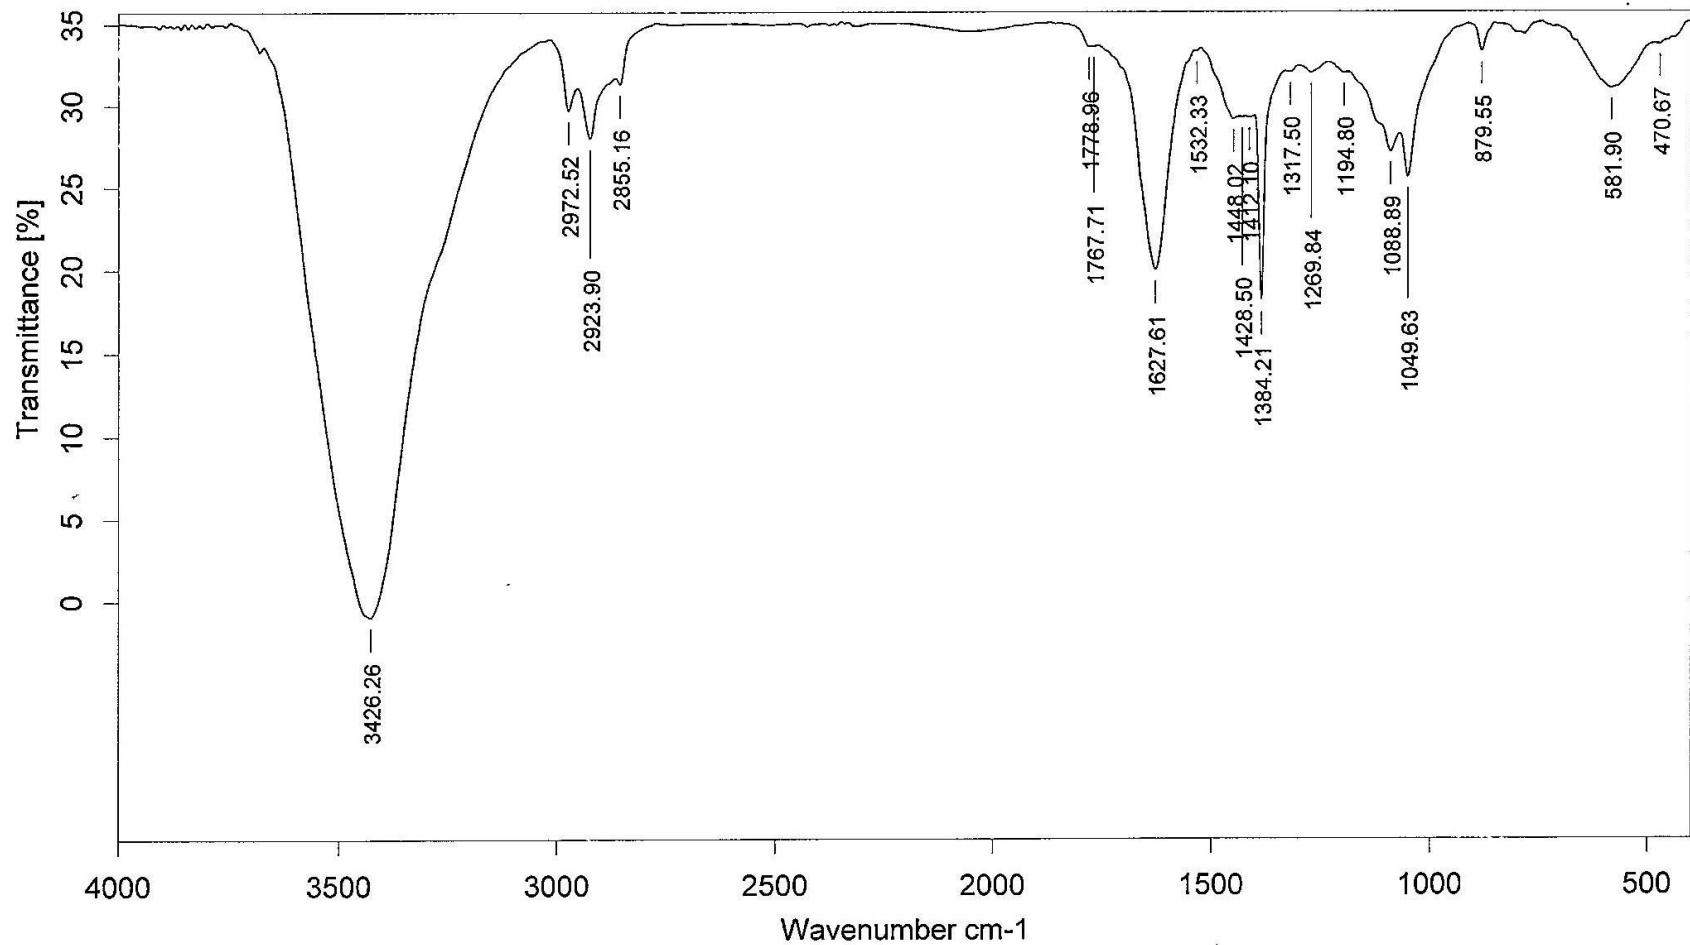

|                      |  |                                     |  |                          |  |
|----------------------|--|-------------------------------------|--|--------------------------|--|
| Sample : lzlx11b     |  | Frequency Range : 399.246 - 3996.32 |  | Measured on : 05/01/2016 |  |
| Technique : KBr压片    |  | Resolution : 4                      |  | Instrument : Tensor27    |  |
| Customer : 160105IR1 |  | Zerofilling : 2                     |  | Sample Scans : 16        |  |
|                      |  | Acquisition : Double Sided,For      |  |                          |  |

**Fig. 28S** Optical rotatory data of ( $\pm$ )-1.

Optical rotation measurement

Model : P-1020 (A060460638)

| No.  | Sample  | Mode   | Data     | Monitor Blank     | Temp. Cell<br>Temp Point | Date<br>Comment<br>Sample Name                          | Light Filter<br>Operator | Cycle Time<br>Integ Time |
|------|---------|--------|----------|-------------------|--------------------------|---------------------------------------------------------|--------------------------|--------------------------|
| No.1 | 2 (1/3) | Sp.Rot | -17.1430 | -0.0012<br>0.0000 | 19.6<br>10.00            | Thu Jan 07 16:09:30 2016<br>0.00070g/mL MeOH<br>LZLX11B | Na<br>589nm              | 2 sec<br>10 sec          |
| No.2 | 2 (2/3) | Sp.Rot | -15.7140 | -0.0011<br>0.0000 | 19.6<br>10.00            | Thu Jan 07 16:09:43 2016<br>0.00070g/mL MeOH<br>LZLX11B | Na<br>589nm              | 2 sec<br>10 sec          |
| No.3 | 2 (3/3) | Sp.Rot | -17.1430 | -0.0012<br>0.0000 | 19.6<br>10.00            | Thu Jan 07 16:09:57 2016<br>0.00070g/mL MeOH<br>LZLX11B | Na<br>589nm              | 2 sec<br>10 sec          |

*-16.6667°*



**Fig. 29S** Optical rotatory data of (+)-1.

Optical rotation measurement

Model : P-1020 (A060460638)

| No.  | Sample   | Mode   | Data    | Monitor Blank    | Temp. Cell Temp Point | Date Comment Sample Name                                 | Light Filter Operator | Cycle Time Integ Time |
|------|----------|--------|---------|------------------|-----------------------|----------------------------------------------------------|-----------------------|-----------------------|
| No.1 | 18 (1/3) | Sp.Rot | 32.0000 | 0.0048<br>0.0000 | 18.3<br>10.00         | Sun Jan 17 16:28:49 2016<br>0.00150g/mL MeOH<br>LZLX11BA | Na<br>589nm           | 2 sec<br>10 sec       |
| No.2 | 18 (2/3) | Sp.Rot | 30.6670 | 0.0046<br>0.0000 | 18.3<br>10.00         | Sun Jan 17 16:29:02 2016<br>0.00150g/mL MeOH<br>LZLX11BA | Na<br>589nm           | 2 sec<br>10 sec       |
| No.3 | 18 (3/3) | Sp.Rot | 36.6670 | 0.0055<br>0.0000 | 18.3<br>10.00         | Sun Jan 17 16:29:16 2016<br>0.00150g/mL MeOH<br>LZLX11BA | Na<br>589nm           | 2 sec<br>10 sec       |
| No.4 | 19 (1/3) | Sp.Rot | 28.0000 | 0.0042<br>0.0000 | 18.3<br>10.00         | Sun Jan 17 16:29:59 2016<br>0.00150g/mL MeOH<br>LZLX11BA | Na<br>589nm           | 2 sec<br>10 sec       |
| No.5 | 19 (2/3) | Sp.Rot | 36.6670 | 0.0055<br>0.0000 | 18.3<br>10.00         | Sun Jan 17 16:30:13 2016<br>0.00150g/mL MeOH<br>LZLX11BA | Na<br>589nm           | 2 sec<br>10 sec       |
| No.6 | 19 (3/3) | Sp.Rot | 32.0000 | 0.0048<br>0.0000 | 18.3<br>10.00         | Sun Jan 17 16:30:26 2016<br>0.00150g/mL MeOH<br>LZLX11BA | Na<br>589nm           | 2 sec<br>10 sec       |

*+32.6667°*

**Fig. 30S** Optical rotatory data of (-)-1.

Optical rotation measurement

Model : P-1020 (A060460638)

| No.  | Sample   | Mode   | Data   | Monitor Blank    | Temp. Cell<br>Temp Point | Date<br>Comment<br>Sample Name                           | Light Filter<br>Operator | Cycle Time<br>Integ Time |
|------|----------|--------|--------|------------------|--------------------------|----------------------------------------------------------|--------------------------|--------------------------|
| No.1 | 20 (1/3) | Sp.Rot | 9.3330 | 0.0014<br>0.0000 | 18.5<br>10.00<br>Cell    | Sun Jan 17 16:43:49 2016<br>0.00150g/mL MeOH<br>LZLX11BB | Na<br>589nm              | 2 sec<br>10 sec          |
| No.2 | 20 (2/3) | Sp.Rot | 4.6670 | 0.0007<br>0.0000 | 18.5<br>10.00<br>Cell    | Sun Jan 17 16:44:03 2016<br>0.00150g/mL MeOH<br>LZLX11BB | Na<br>589nm              | 2 sec<br>10 sec          |
| No.3 | 20 (3/3) | Sp.Rot | 2.6670 | 0.0004<br>0.0000 | 18.5<br>10.00<br>Cell    | Sun Jan 17 16:44:16 2016<br>0.00150g/mL MeOH<br>LZLX11BB | Na<br>589nm              | 2 sec<br>10 sec          |
| No.4 | 21 (1/3) | Sp.Rot | 9.3330 | 0.0014<br>0.0000 | 18.5<br>10.00<br>Cell    | Sun Jan 17 16:45:11 2016<br>0.00150g/mL MeOH<br>LZLX11BB | Na<br>589nm              | 2 sec<br>10 sec          |
| No.5 | 21 (2/3) | Sp.Rot | 0.6670 | 0.0001<br>0.0000 | 18.4<br>10.00<br>Cell    | Sun Jan 17 16:45:24 2016<br>0.00150g/mL MeOH<br>LZLX11BB | Na<br>589nm              | 2 sec<br>10 sec          |
| No.6 | 21 (3/3) | Sp.Rot | 4.0000 | 0.0006<br>0.0000 | 18.5<br>10.00<br>Cell    | Sun Jan 17 16:45:38 2016<br>0.00150g/mL MeOH<br>LZLX11BB | Na<br>589nm              | 2 sec<br>10 sec          |

+5.1112°

Fig. 31S UV spectrum of 1.

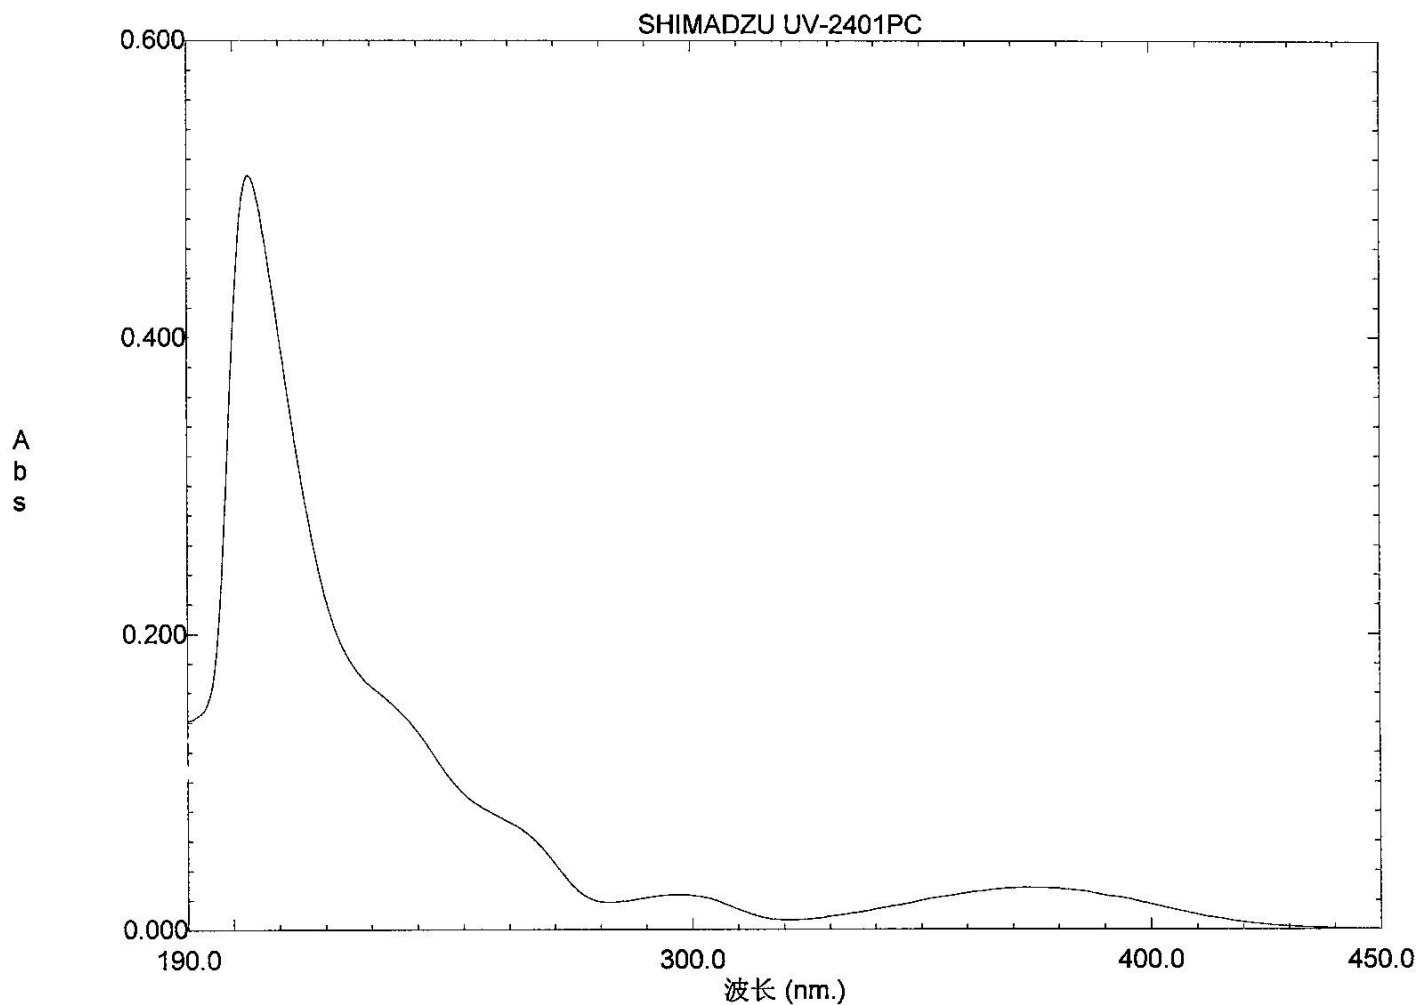

文件名: LZLX11B

LZLX11B

创建于: 14:43 16-01-08

数据: 原始

样品浓度: 0.0067毫克/毫升

溶剂: 甲醇

测量模式: Abs.

扫描速度: 中速

狭缝: 5.0

采样间隔: 0.5

| 否. | 波长 (nm.) | Abs.   |
|----|----------|--------|
| 1  | 373.50   | 0.0283 |
| 2  | 297.00   | 0.0236 |
| 3  | 203.50   | 0.5090 |
